# Supplementary material for: Towards near-real-time air pollutant and greenhouse gas emissions: lessons learned from multiple estimates during the COVID-19 pandemic
Source: Copernicus journal article supplement (doi:10.5194/acp-23-8081-2023), 2023-07-19
Supplement: Supplementary file 1 [file acp-23-8081-2023-supplement.zip]

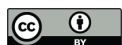

## *Supplement of*

# **Towards near-real-time air pollutant and greenhouse gas emissions: lessons learned from multiple estimates during the COVID-19 pandemic**

**Marc Guevara et al.**

*Correspondence to:* Marc Guevara ([marc.guevara@bsc.es](mailto:marc.guevara@bsc.es))

- [acp-23-8081-2023-supplement-title-page.pdf](#)
- [summary\\_intercomparison\\_emissions.xlsx](#)
- [supplementary\\_intercomparison\\_2020\\_eu\\_emissions\\_v2.docx](#)

The copyright of individual parts of the supplement might differ from the article licence.
