# Supplementary material for: Towards near-real-time air pollutant and greenhouse gas emissions: lessons learned from multiple estimates during the COVID-19 pandemic
Source: Copernicus journal article supplement (doi:10.5194/acp-23-8081-2023), 2023-07-19
Supplement: Supplementary file 2 [file acp-23-8081-2023-supplement.zip]

Archive with 3 entries (3 files):
- acp-23-8081-2023-supplement-title-page.pdf
- summary_intercomparison_emissions.xlsx
- supplementary_intercomparison_2020_eu_emissions_v2.docx
