# Supplementary material for: Towards near-real-time air pollutant and greenhouse gas emissions: lessons learned from multiple estimates during the COVID-19 pandemic
Source: Copernicus journal article supplement (doi:10.5194/acp-23-8081-2023), 2023-07-19
Supplement: Supplementary file 2 [file acp-23-8081-2023-supplement.zip › summary_intercomparison_emissions.xlsx]

## Sheet: README
column	description
ISO3	ISO 3166-1 alpha-3 official country code
GNFR	pollutant sector (Gridded Nomenclature for Reporting, A to L)
Month	Month of the year (1 to 12)
POLL	Air pollutants (NOx, SO2, CO, NH3, PM10, PM2.5, NH3) and greenhouse gases (CO2, CH4)
official_inventory_2019_Gg	Emissions reported by official emission inventories for 2019 - CEIP (2022) for air pollutants and UNFCCC (2022) for greenhouse gases - in Gg
official_inventory_2020_Gg	Emissions reported by official emission inventories for 2020 - CEIP (2022) for air pollutants and UNFCCC (2022) for greenhouse gases - in Gg
CAMS-REG_v5.1_2020_business-as-usual_Gg	Emissions reported by the CAMS-REG_v5.1-BAU inventory for 2020 in Gg (Kuenen et al., 2022)
CAMS-REG_v5.1_2020_guevaraetal_Gg	Emissions reported by the CAMS-REG_v5.1-BAU inventory for 2020 combined with the COVID-19 adjustment factors reported by Guevara et al., (2022) in Gg
CAMS-REG_v5.1_2020_doumbiaetal_Gg	Emissions reported by the CAMS-REG_v5.1-BAU inventory for 2020 combined with the COVID-19 adjustment factors reported by Doumbia et al., (2021) in Gg
CAMS-REG_v5.1_2020_forsteretal_Gg	Emissions reported by the CAMS-REG_v5.1-BAU inventory for 2020 combined with the COVID-19 adjustment factors reported by Forster et al., (2020) in Gg
liuetal_2019_Tg	Emissions reported by Liu et al. (2020) for 2019 (only for CO2)
liuetal_2020_Tg	Emissions reported by Liu et al. (2020) for 2020 (only for CO2)
references
CEIP: EMEP Centre on Emissions Inventories and Projections. Officially reported emission data, available at: https://www.ceip.at/webdab-emission-database/reported-emissiondata (last access: October 2022), 2022.
Doumbia, T., Granier, C., Elguindi, N., Bouarar, I., Darras, S., Brasseur, G., Gaubert, B., Liu, Y., Shi, X., Stavrakou, T., Tilmes, S., Lacey, F., Deroubaix, A., and Wang, T.: Changes in global air pollutant emissions during the COVID-19 pandemic: a dataset for atmospheric modeling, Earth Syst. Sci. Data, 13, 4191–4206, https://doi.org/10.5194/essd-13-4191-2021, 2021.
Forster, P. M., Forster, H. I., Evans, M. J., Gidden, M. J., Jones, C. D., Keller, C. A., Lamboll, R. D., Le Quéré, C., Rogelj, J., Rosen, D., Schleussner, C.-F., Richardson, T. B., Smith, C. J., and Turnock, S. T.: Current and future global climate impacts resulting from COVID-19, Nat. Clim. Change, 10, 913–919, https://doi.org/10.1038/s41558-020-0883-0, 2020.
Guevara, M., Petetin, H., Jorba, O., Denier van der Gon, H., Kuenen, J., Super, I., Jalkanen, J.-P., Majamäki, E., Johansson, L., Peuch, V.-H., and Pérez García-Pando, C.: European primary emissions of criteria pollutants and greenhouse gases in 2020 modulated by the COVID-19 pandemic disruptions, Earth Syst. Sci. Data, 14, 2521–2552, https://doi.org/10.5194/essd-14-2521-2022, 2022.
Kuenen, J., Dellaert, S., Visschedijk, A., Jalkanen, J.-P., Super, I., and Denier van der Gon, H. : Copernicus Atmosphere Monitoring Service regional emissions version 5.1 business-as-usual 2020 (CAMS-REG-v5.1 BAU 2020), Copernicus Atmosphere Monitoring Service, ECCAD [data set], https://doi.org/10.24380/eptm-kn40, 2022.
Liu, Z., Ciais, P., Deng, Z., Lei, R., Davis, S. J., Feng, S., Zheng, B., Cui, D., Dou, X., Zhu, B., Guo, R., Ke, P., Sun, T., Lu, C., He, P., Wang, Y., Yue, X., Wang, Y., Lei, Y., Zhou, H., Cai, Z., Wu, Y., Guo, R., Han, T., Xue, J., Boucher, O., Boucher, E., Chevallier, F., Tanaka, K., Wei, Y., Zhong, H., Kang, C., Zhang, N., Chen, B., Xi, F., Liu, M., Bréon, F.-M., Lu, Y., Zhang, Q., Guan, D.,…
UNFCCC: National Inventory Submissions 2022, available at: https://unfccc.int/ghg-inventories-annex-i-parties/2022 (last access: October 2022), 2022.

## Sheet: comparison_annual_emissions
ISO3	GNFR	POLL	official_inventory_2019_Gg	official_inventory_2020_Gg	CAMS-REG_v5.1_2020_business-as-usual_Gg	CAMS-REG_v5.1_2020_guevaraetal_Gg	CAMS-REG_v5.1_2020_doumbiaetal_Gg	CAMS-REG_v5.1_2020_forsteretal_Gg	liuetal_2019_Tg	liuetal_2020_Tg
AUT	A	CH4	0.85828	0.872849	0.864671	0.830631	0.846394	0.78521
AUT	A	CO	3.95252	3.99547	3.89845	3.74498	3.81605	3.5402
AUT	A	CO2	6952.5	5664.78	12373.6	11886.5	12112.1	11236.5	14.0785	12.1483
AUT	A	NH3	0.334294	0.337942	0.330168	0.31717	0.323189	0.299826
AUT	A	NMVOC	0.296532	0.302246	0.304777	0.292779	0.298335	0.276769
AUT	A	NOx	8.49474	8.13629	8.23223	7.90814	8.05822	7.47571
AUT	A	PM10	0.952703	0.99118	0.949512	0.912132	0.929441	0.862255
AUT	A	PM2.5	0.794127	0.826088	0.792132	0.760948	0.775388	0.719337
AUT	A	SO2	0.828351	0.694424	0.743625	0.714351	0.727907	0.675289
AUT	B	CH4	2.83983	2.92976	2.68317	2.67553	2.07103	2.02405
AUT	B	CO	174.332	167.368	163.149	149.067	125.928	123.071
AUT	B	CO2	27827.4	26543.4	31654.4	29088.2	24432.8	23878.5	19.7487	18.449
AUT	B	NH3	0.626436	0.577686	0.554854	0.519854	0.42827	0.418555
AUT	B	NMVOC	4.27814	4.19292	4.20004	4.19039	3.24185	3.16831
AUT	B	NOx	22.1083	21.7498	20.6469	18.9864	15.9365	15.575
AUT	B	PM10	8.72729	8.41034	7.95616	7.25141	6.14105	6.00174
AUT	B	PM2.5	2.09692	2.04938	1.99951	1.84722	1.54335	1.50833
AUT	B	SO2	8.53945	8.15549	8.45915	7.7502	6.52929	6.38117
AUT	C	CH4	10.4564	10.4639	10.9913	11.1657	11.5128	11.5433
AUT	C	CO	224.594	223.775	231.679	236.325	245.279	246.089
AUT	C	CO2	8643.63	8616.92	16594.4	16702.1	17157.5	17178	8.89038	9.01969
AUT	C	NH3	0.596866	0.598187	0.600194	0.606207	0.624256	0.62535
AUT	C	NMVOC	24.8539	24.8625	25.595	26.0677	27.0164	27.0991
AUT	C	NOx	11.9052	11.8423	12.17	12.2622	12.6086	12.6259
AUT	C	PM10	6.95389	6.93024	7.23499	7.34282	7.58939	7.60846
AUT	C	PM2.5	6.55553	6.52686	6.82777	6.92984	7.16335	7.18141
AUT	C	SO2	1.41433	1.41086	0.790833	0.793275	0.812033	0.812557
AUT	D	CH4	9.14939	8.7877	9.17065	9.17065	9.17065	9.17065
AUT	D	CO	0	0	0	0	0	0
AUT	D	CO2	118.253	109.25	127.248	127.248	127.248	127.248
AUT	D	NH3	0.000419525	0.000154276	0.000502799	0.000502799	0.000502799	0.000502799
AUT	D	NMVOC	2.32533	1.86892	2.02733	1.83109	2.02733	2.02733
AUT	D	NOx	0	0	0	0	0	0
AUT	D	PM10	0.185829	0.159439	0.167772	0.154702	0.167772	0.167772
AUT	D	PM2.5	0.0586934	0.0503622	0.0529684	0.0488421	0.0529684	0.0529684
AUT	D	SO2	0.023	0.024	0.023	0.023	0.023	0.023
AUT	E	CH4	0	0	0	0	0	0
AUT	E	CO	0.725229	0.755928	0.727308	0.727308	0.727308	0.727308
AUT	E	CO2	145.733	153.915	141.503	141.503	141.503	141.503
AUT	E	NH3	0.0557611	0.0585614	0.0562078	0.0562078	0.0562078	0.0562078
AUT	E	NMVOC	32.458	36.7355	30.1683	29.6595	30.1683	30.1683
AUT	E	NOx	0.023734	0.0247129	0.0237876	0.0237876	0.0237876	0.0237876
AUT	E	PM10	0.509608	0.437265	0.458677	0.458677	0.458677	0.458677
AUT	E	PM2.5	0.432857	0.404	0.407778	0.407778	0.407778	0.407778
AUT	E	SO2	0.00483096	0.00209381	0.00320375	0.00320375	0.00320375	0.00320375
AUT	F	CH4	0.836068	0.734739	0.815168	0.61784	0.651824	0.591808
AUT	F	CO	58.2888	46.8796	51.9835	40.5216	41.567	37.7398
AUT	F	CO2	23428.6	20313.3	25051.6	20496.1	20031.7	18187.3	24.3231	24.0588
AUT	F	NH3	1.09215	0.897019	0.905299	0.71192	0.723895	0.657243
AUT	F	NMVOC	4.70738	4.06742	3.15247	2.42502	2.52077	2.28867
AUT	F	NOx	74.3979	57.7494	70.597	54.8908	56.4507	51.2531
AUT	F	PM10	3.50863	2.891	2.95057	2.39982	2.35933	2.1421
AUT	F	PM2.5	2.45946	1.98959	1.89869	1.53339	1.51823	1.37844
AUT	F	SO2	0.140348	0.122565	0.143534	0.118319	0.114772	0.104205
AUT	H	CH4	0.0191994	0.00891353	0.00134627	0.000557864	0.000841558	0.000736772
AUT	H	CO	3.93604	2.83382	3.96365	1.64244	2.47769	2.16918
AUT	H	CO2	2952.84	1067.46	337.063	139.671	210.699	184.464	3.96069	1.50874
AUT	H	NH3	0.000927558	0.000392251	0.000832491	0.000344965	0.000520392	0.000455596
AUT	H	NMVOC	0.214137	0.114646	0.206609	0.0856138	0.129151	0.11307
AUT	H	NOx	1.85334	0.70442	1.61912	0.670926	1.01212	0.886094
AUT	H	PM10	0.13728	0.0538804	0.121849	0.0504914	0.0761682	0.0666842
AUT	H	PM2.5	0.13728	0.0538804	0.121849	0.0504914	0.0761682	0.0666842
AUT	H	SO2	0.108274	0.0433543	0.0965955	0.0400269	0.060382	0.0528636
AUT	I	CH4	0.0128312	0.011221	0.154003	0.153597	0.154003	0.154003
AUT	I	CO	25.5253	24.1717	31.124	30.8272	31.124	31.124
AUT	I	CO2	683.162	592.235	2963.23	2870.4	2963.23	2963.23
AUT	I	NH3	0.0152269	0.0136327	0.0157839	0.0156253	0.0157839	0.0157839
AUT	I	NMVOC	2.54665	2.33467	2.81489	2.80013	2.81489	2.81489
AUT	I	NOx	13.2421	12.2379	14.1373	13.6927	14.1373	14.1373
AUT	I	PM10	1.17447	1.10697	1.25063	1.24091	1.25063	1.25063
AUT	I	PM2.5	0.810793	0.743379	0.886884	0.87716	0.886884	0.886884
AUT	I	SO2	0.0669302	0.0614036	0.0726451	0.0720465	0.0726451	0.0726451
AUT	J	CH4	39.543	37.4689	46.1014	46.1014	46.1014	46.1014
AUT	J	CO	2.75094	2.59387	2.9604	2.9604	2.9604	2.9604
AUT	J	CO2	2.052	2.052	2.052	2.052	2.052	2.052
AUT	J	NH3	1.44813	1.47672	1.60108	1.60108	1.60108	1.60108
AUT	J	NMVOC	0.0541732	0.0520181	0.0563196	0.0563196	0.0563196	0.0563196
AUT	J	NOx	0.0191761	0.0207201	0.0188945	0.0188945	0.0188945	0.0188945
AUT	J	PM10	0.513714	0.479259	0.43528	0.43528	0.43528	0.43528
AUT	J	PM2.5	0.322332	0.310927	0.27563	0.27563	0.27563	0.27563
AUT	J	SO2	0.0138042	0.0143858	0.0136981	0.0136981	0.0136981	0.0136981
AUT	K	CH4	172.844	171.481	186.514	186.514	186.514	186.514
AUT	K	CO	0	0	0	0	0	0
AUT	K	CO2	0	0	0	0	0	0
AUT	K	NH3	30.6938	30.6263	29.1238	29.1238	29.1238	29.1238
AUT	K	NMVOC	26.1348	25.995	26.9434	26.9434	26.9434	26.9434
AUT	K	NOx	0.579862	0.581411	0	0	0	0
AUT	K	PM10	0.511961	0.513892	0.501685	0.501685	0.501685	0.501685
AUT	K	PM2.5	0.113769	0.114198	0.111485	0.111485	0.111485	0.111485
AUT	K	SO2	0	0	0	0	0	0
AUT	L	CH4	0.0195486	0.0167917	0.00100863	0.00100863	0.00100863	0.00100863
AUT	L	CO	0.296602	0.219794	0.009	0.009	0.009	0.009
AUT	L	CO2	0	0	120.493	120.493	120.493	120.493
AUT	L	NH3	31.0921	30.8327	31.8287	31.8287	31.8287	31.8287
AUT	L	NMVOC	10.0235	9.97341	9.86057	9.86057	9.86057	9.86057
AUT	L	NOx	10.2774	10.2997	0.000310345	0.000310345	0.000310345	0.000310345
AUT	L	PM10	3.33887	3.30665	3.33367	3.33367	3.33367	3.33367
AUT	L	PM2.5	0.15793	0.150392	0.136735	0.136735	0.136735	0.136735
AUT	L	SO2	0.00108621	0.000669078	3.82896e-05	3.82896e-05	3.82896e-05	3.82896e-05
BEL	A	CH4	1.31662	1.33487	0.917323	0.883419	0.868086	0.838833
BEL	A	CO	1.98237	2.35105	2.29886	2.2139	2.17547	2.10216
BEL	A	CO2	14981.7	13866.6	19409.5	18692.1	18367.7	17748.7	18.2468	18.4829
BEL	A	NH3	0.236089	0.226396	0.224939	0.216626	0.212866	0.205693
BEL	A	NMVOC	0.453897	0.443521	0.396914	0.382245	0.37561	0.362953
BEL	A	NOx	8.461	8.97504	7.68651	7.40242	7.27394	7.02882
BEL	A	PM10	0.31291	0.41275	0.303739	0.292513	0.287436	0.27775
BEL	A	PM2.5	0.266372	0.351431	0.25842	0.248869	0.244549	0.236308
BEL	A	SO2	0.853577	0.998726	0.0888188	0.0855362	0.0840515	0.0812192
BEL	B	CH4	3.43514	3.09852	2.66863	2.57147	1.96919	1.95012
BEL	B	CO	207.326	130.219	144.17	136.206	106.383	105.353
BEL	B	CO2	34754	32442.2	36030	34770.1	26586.5	26329.1	26.7448	25.7938
BEL	B	NH3	1.76489	1.78202	1.90741	1.84441	1.40748	1.39385
BEL	B	NMVOC	14.9301	13.9422	13.517	13.1944	9.97417	9.8776
BEL	B	NOx	39.2146	36.1242	36.7677	35.2663	27.1309	26.8682
BEL	B	PM10	7.30808	7.18824	7.73081	7.3265	5.70457	5.64934
BEL	B	PM2.5	3.38122	3.3132	3.45184	3.28057	2.54712	2.52246
BEL	B	SO2	25.0054	19.0759	23.4494	22.5653	17.3033	17.1358
BEL	C	CH4	16.597	16.3318	16.1512	16.2306	16.7923	16.8009
BEL	C	CO	66.4212	61.3567	77.0227	78.5187	83.1555	83.3513
BEL	C	CO2	23354	22028.4	23969.8	23544	24139.2	24072.4	24.6761	23.5915
BEL	C	NH3	1.09933	1.01229	1.26564	1.29176	1.37074	1.37417
BEL	C	NMVOC	11.5511	10.9519	12.827	12.9561	13.5443	13.5601
BEL	C	NOx	15.5405	14.7045	14.2682	13.9601	14.1958	14.1486
BEL	C	PM10	9.13631	8.33493	11.7138	12.0011	12.7722	12.8105
BEL	C	PM2.5	8.92074	8.13925	11.4337	11.7145	12.4678	12.5053
BEL	C	SO2	1.81137	1.70768	4.8641	4.89118	5.12369	5.12637
BEL	D	CH4	21.5437	20.4882	20.4426	20.3261	20.4426	20.4426
BEL	D	CO	0.221092	0.198919	0.23068	0.228981	0.23068	0.23068
BEL	D	CO2	116.104	101.449	121.246	120.356	121.246	121.246
BEL	D	NH3	0	0	0	0	0	0
BEL	D	NMVOC	6.69116	5.46195	5.08765	4.86459	5.08765	5.08765
BEL	D	NOx	0.063292	0.062077	0.0651987	0.0647186	0.0651987	0.0651987
BEL	D	PM10	0.150423	0.140289	0.124016	0.123103	0.124016	0.124016
BEL	D	PM2.5	0.127617	0.116167	0.108754	0.107953	0.108754	0.108754
BEL	D	SO2	1.56719	2.03078	1.80546	1.79217	1.80546	1.80546
BEL	E	CH4	0	0	0	0	0	0
BEL	E	CO	0.944957	0.845982	1.04653	1.04591	1.04653	1.04653
BEL	E	CO2	124.725	105.242	124.345	124.345	124.345	124.345
BEL	E	NH3	0.18343	0.0993032	0.185487	0.185487	0.185487	0.185487
BEL	E	NMVOC	35.2474	39.7452	35.4226	35.136	35.4226	35.4226
BEL	E	NOx	0.107836	0.0557527	0.0870165	0.0860397	0.0870165	0.0870165
BEL	E	PM10	0.485029	0.435256	0.518105	0.518105	0.518105	0.518105
BEL	E	PM2.5	0.45668	0.409403	0.492199	0.492199	0.492199	0.492199
BEL	E	SO2	0.015477	0.0159444	0.01176	0.0117036	0.01176	0.01176
BEL	F	CH4	0.7337	0.599779	0.533972	0.405124	0.39058	0.372279
BEL	F	CO	47.7464	36.2063	38.8263	30.1107	28.4	27.0693
BEL	F	CO2	24752.5	20541.8	28006.3	22657.4	20485.5	19525.6	24.704	24.2782
BEL	F	NH3	1.00969	0.842514	0.923866	0.714879	0.675772	0.644108
BEL	F	NMVOC	7.91335	7.37065	5.34472	4.05273	3.90946	3.72628
BEL	F	NOx	62.1208	46.017	61.5705	47.9385	45.0365	42.9263
BEL	F	PM10	4.13754	3.39373	3.65401	2.9431	2.67277	2.54753
BEL	F	PM2.5	2.6965	2.14552	2.26358	1.81707	1.65572	1.57814
BEL	F	SO2	0.107066	0.0946423	0.112892	0.0920609	0.082576	0.0787069
BEL	H	CH4	0.0353878	0.0221517	0.00149296	0.000758293	0.000953647	0.000651027
BEL	H	CO	1.621	1.5838	2.18686	1.11074	1.39689	0.953616
BEL	H	CO2	5185.29	3615.49	435.218	221.053	278.002	189.784	5.21874	2.97512
BEL	H	NH3	0	0	0	0	0	0
BEL	H	NMVOC	0.150703	0.0936781	0.16621	0.0844205	0.106169	0.0724786
BEL	H	NOx	2.05122	1.31317	2.00535	1.01854	1.28095	0.874464
BEL	H	PM10	0.01663	0.00934865	0.0169885	0.00862871	0.0108517	0.00740812
BEL	H	PM2.5	0.0127349	0.00728669	0.0131454	0.00667674	0.00839683	0.00573227
BEL	H	SO2	0.114938	0.0674406	0.11505	0.0584355	0.0734899	0.0501694
BEL	I	CH4	0.016589	0.0160761	0.203404	0.200417	0.203404	0.203404
BEL	I	CO	31.6559	31.8911	32.7455	32.5421	32.7455	32.7455
BEL	I	CO2	648.928	589.067	1705.32	1682.59	1705.32	1705.32
BEL	I	NH3	0.00397661	0.00391796	0.00379154	0.0037355	0.00379154	0.00379154
BEL	I	NMVOC	3.61424	3.29363	3.15432	3.1146	3.15432	3.15432
BEL	I	NOx	8.517	7.95226	8.63433	8.55356	8.63433	8.63433
BEL	I	PM10	0.908284	0.882756	0.908514	0.896961	0.908514	0.908514
BEL	I	PM2.5	0.638971	0.611677	0.646847	0.64039	0.646847	0.646847
BEL	I	SO2	0.0307141	0.0294656	0.222642	0.22119	0.222642	0.222642
BEL	J	CH4	36.3954	33.0209	38.6722	38.6722	38.6722	38.6722
BEL	J	CO	0.192233	0.15446	0.198092	0.198092	0.198092	0.198092
BEL	J	CO2	280.769	254.026	284.241	284.241	284.241	284.241
BEL	J	NH3	0.321492	0.322808	0.127977	0.127977	0.127977	0.127977
BEL	J	NMVOC	0.672309	0.625778	0.774116	0.774116	0.774116	0.774116
BEL	J	NOx	0.403201	0.558646	0.246303	0.246303	0.246303	0.246303
BEL	J	PM10	0.880709	0.898533	0.711777	0.711777	0.711777	0.711777
BEL	J	PM2.5	0.880129	0.898012	0.71125	0.71125	0.71125	0.71125
BEL	J	SO2	0.00918088	0.00997273	0.00679881	0.00679881	0.00679881	0.00679881
BEL	K	CH4	209.614	209.051	232.493	232.493	232.493	232.493
BEL	K	CO	0	0	0	0	0	0
BEL	K	CO2	0	0	0	0	0	0
BEL	K	NH3	37.362	37.2987	39.0816	39.0816	39.0816	39.0816
BEL	K	NMVOC	29.4655	29.6357	32.2416	32.2416	32.2416	32.2416
BEL	K	NOx	1.52797	1.5616	0	0	0	0
BEL	K	PM10	2.38565	2.45963	2.40037	2.40037	2.40037	2.40037
BEL	K	PM2.5	0.543514	0.546507	0.546705	0.546705	0.546705	0.546705
BEL	K	SO2	0	0	0	0	0	0
BEL	L	CH4	0	0	0.00593969	0.00593969	0.00593969	0.00593969
BEL	L	CO	0	0	0.053	0.053	0.053	0.053
BEL	L	CO2	0	0	191.869	191.869	191.869	191.869
BEL	L	NH3	26.3568	26.4072	26.1897	26.1897	26.1897	26.1897
BEL	L	NMVOC	1.20832	1.212	11.2499	11.2499	11.2499	11.2499
BEL	L	NOx	12.0526	12.1616	0.00182759	0.00182759	0.00182759	0.00182759
BEL	L	PM10	1.26745	1.22288	2.19858	2.19858	2.19858	2.19858
BEL	L	PM2.5	0.0707164	0.068207	0.0883894	0.0883894	0.0883894	0.0883894
BEL	L	SO2	0	0	0.000225483	0.000225483	0.000225483	0.000225483
BGR	A	CH4	0.817801	0.716549	0.715408	0.690811	0.69251	0.641911
BGR	A	CO	4.40829	4.12418	0.550691	0.531757	0.533066	0.494117
BGR	A	CO2	21392.9	17336.9	24409.8	23570.6	23628.6	21902.1	22.1292	18.1001
BGR	A	NH3	0.0170578	0.0165843	0	0	0	0
BGR	A	NMVOC	0.637805	0.656972	0.0353129	0.0340988	0.0341827	0.0316851
BGR	A	NOx	14.0544	12.1072	16.4041	15.8401	15.8791	14.7189
BGR	A	PM10	0.27	0.21	0.336599	0.325026	0.325826	0.302019
BGR	A	PM2.5	0.21	0.17	0.329822	0.318482	0.319265	0.295938
BGR	A	SO2	33.8906	26.8811	37.7081	36.4117	36.5012	33.8342
BGR	B	CH4	0.743338	0.646848	0.594471	0.572803	0.499604	0.475642
BGR	B	CO	23.374	21.7319	18.8612	18.3477	15.8512	15.091
BGR	B	CO2	8793.51	8250.13	10243.2	9877.76	8608.6	8195.71	6.04865	5.68896
BGR	B	NH3	1.52574	1.31841	3.11789	3.05178	2.62033	2.49465
BGR	B	NMVOC	7.14461	7.03745	5.89306	5.75862	4.95263	4.7151
BGR	B	NOx	8.32416	8.89316	9.47925	9.08667	7.96653	7.58444
BGR	B	PM10	9.09138	7.1431	10.3546	9.95283	8.70217	8.2848
BGR	B	PM2.5	2.99722	2.1912	1.6875	1.62237	1.4182	1.35018
BGR	B	SO2	27.0325	32.4457	40.0691	38.8749	33.6748	32.0597
BGR	C	CH4	11.8579	13.1931	12.143	12.1633	12.3163	12.366
BGR	C	CO	136.656	151.348	143.435	145.758	148.626	149.695
BGR	C	CO2	1380.62	1396.37	5016.84	4987.01	5030.82	5042.53	1.61636	1.65651
BGR	C	NH3	2.05529	2.32203	2.10883	2.14302	2.1852	2.20093
BGR	C	NMVOC	18.6231	20.8209	19.4642	19.7798	20.1691	20.3143
BGR	C	NOx	2.76349	2.93283	3.05721	3.03715	3.06214	3.06861
BGR	C	PM10	23.0843	25.8792	24.0447	24.4343	24.9152	25.0944
BGR	C	PM2.5	22.4581	25.1832	23.3943	23.7736	24.2416	24.4161
BGR	C	SO2	5.93089	5.10119	5.15904	5.20212	5.28234	5.3107
BGR	D	CH4	42.0465	37.4944	45.4173	38.4708	45.4173	45.4173
BGR	D	CO	0.698215	0.496376	0.601141	0.562991	0.601141	0.601141
BGR	D	CO2	827.004	684.223	711.557	680.507	711.557	711.557
BGR	D	NH3	0.00752916	0.00535151	0.00646774	0.00605729	0.00646774	0.00646774
BGR	D	NMVOC	10.2025	7.31228	9.32716	7.85295	9.32716	9.32716
BGR	D	NOx	2.01259	1.43097	1.73497	1.62487	1.73497	1.73497
BGR	D	PM10	1.15979	0.917804	1.23648	1.00598	1.23648	1.23648
BGR	D	PM2.5	0.197436	0.15471	0.206555	0.170058	0.206555	0.206555
BGR	D	SO2	4.77112	3.39184	4.10721	3.84656	4.10721	4.10721
BGR	E	CH4	0	0	0	0	0	0
BGR	E	CO	0.589311	0.24518	0.645191	0.645191	0.645191	0.645191
BGR	E	CO2	124.994	107.178	122.94	122.94	122.94	122.94
BGR	E	NH3	0.0431888	0.0179627	0.0479793	0.0479793	0.0479793	0.0479793
BGR	E	NMVOC	14.6625	13.9363	14.9141	14.822	14.9141	14.9141
BGR	E	NOx	0.0193103	0.00803424	0.0211072	0.0211072	0.0211072	0.0211072
BGR	E	PM10	1.16561	0.85188	1.11126	1.11126	1.11126	1.11126
BGR	E	PM2.5	0.870703	0.606861	0.844874	0.844874	0.844874	0.844874
BGR	E	SO2	0.00671133	0.00282489	0.00344851	0.00344851	0.00344851	0.00344851
BGR	F	CH4	0.838859	0.758944	0.861872	0.771322	0.736937	0.73337
BGR	F	CO	49.4177	44.8303	53.6433	47.7632	45.8673	45.6452
BGR	F	CO2	9618.2	9107.89	9677.71	8720.07	8274.85	8234.79	9.78482	9.67868
BGR	F	NH3	0.739332	0.697998	0.763797	0.677309	0.653078	0.649917
BGR	F	NMVOC	7.71291	6.85331	8.36975	7.45307	7.15649	7.12184
BGR	F	NOx	39.5293	35.9139	39.7923	36.3272	34.0241	33.8594
BGR	F	PM10	3.02965	2.75985	3.08441	2.79207	2.6373	2.62453
BGR	F	PM2.5	2.40234	2.16557	2.48655	2.24557	2.1261	2.11581
BGR	F	SO2	0.0424996	0.036969	0.0403187	0.0364062	0.0344742	0.0343073
BGR	H	CH4	0.00559337	0.00316577	0.000602574	0.000348754	0.00041442	0.000333474
BGR	H	CO	41.3966	24.4765	45.3682	26.2579	31.202	25.1075
BGR	H	CO2	748.569	428.984	110.498	63.9534	75.9952	61.1514	1.21375	0.605532
BGR	H	NH3	0	0	0	0	0	0
BGR	H	NMVOC	0.655447	0.387545	0.71833	0.41575	0.494032	0.397535
BGR	H	NOx	0.137989	0.0815884	0.151227	0.0875263	0.104007	0.0836915
BGR	H	PM10	0	0	0.000378068	0.000218816	0.000260017	0.000209229
BGR	H	PM2.5	0.000344972	0.000203971	0.000378068	0.000218816	0.000260017	0.000209229
BGR	H	SO2	0.0344972	0.0203971	0.0378068	0.0218816	0.0260017	0.0209229
BGR	I	CH4	0.00411137	0.00349083	0.0325533	0.0323505	0.0325533	0.0325533
BGR	I	CO	1.80805	1.76649	1.77691	1.76504	1.77691	1.77691
BGR	I	CO2	170.8	129.749	797.97	794.349	797.97	797.97
BGR	I	NH3	0.00127168	0.0012436	0.00124717	0.00123835	0.00124717	0.00124717
BGR	I	NMVOC	0.573432	0.562068	0.564885	0.561163	0.564885	0.564885
BGR	I	NOx	5.6433	5.53922	5.5682	5.53225	5.5682	5.5682
BGR	I	PM10	0.307716	0.301307	0.300706	0.298387	0.300706	0.300706
BGR	I	PM2.5	0.307014	0.300536	0.299936	0.297617	0.299936	0.299936
BGR	I	SO2	0.00235514	0.00208104	0.00230807	0.0022919	0.00230807	0.00230807
BGR	J	CH4	101.737	98.9167	140.907	140.907	140.907	140.907
BGR	J	CO	0.107411	0.100462	0.0561968	0.0561968	0.0561968	0.0561968
BGR	J	CO2	12.5982	11.3607	6.76743	6.76743	6.76743	6.76743
BGR	J	NH3	1.43666	1.1768	1.45729	1.45729	1.45729	1.45729
BGR	J	NMVOC	1.40643	1.32944	1.82098	1.82098	1.82098	1.82098
BGR	J	NOx	0.0169587	0.0183331	0.0131985	0.0131985	0.0131985	0.0131985
BGR	J	PM10	0.374214	0.350348	0.360888	0.360888	0.360888	0.360888
BGR	J	PM2.5	0.374027	0.350163	0.360546	0.360546	0.360546	0.360546
BGR	J	SO2	0.00225552	0.00259588	0.00207029	0.00207029	0.00207029	0.00207029
BGR	K	CH4	69.5295	72.1952	64.4008	64.4008	64.4008	64.4008
BGR	K	CO	0	0	0	0	0	0
BGR	K	CO2	0	0	0	0	0	0
BGR	K	NH3	9.62865	9.41976	22.0527	22.0527	22.0527	22.0527
BGR	K	NMVOC	10.5393	10.7368	8.82018	8.82018	8.82018	8.82018
BGR	K	NOx	0.185587	0.179452	0	0	0	0
BGR	K	PM10	0.911837	0.875822	0.91248	0.91248	0.91248	0.91248
BGR	K	PM2.5	0.209705	0.207484	0.214228	0.214228	0.214228	0.214228
BGR	K	SO2	0	0	0	0	0	0
BGR	L	CH4	5.43353	5.41823	6.05299	6.05299	6.05299	6.05299
BGR	L	CO	0.0268394	0.0273413	18.639	18.639	18.639	18.639
BGR	L	CO2	0	0	298.739	298.739	298.739	298.739
BGR	L	NH3	26.6286	27.727	15.4695	15.4695	15.4695	15.4695
BGR	L	NMVOC	3.13731	3.17388	8.486	8.486	8.486	8.486
BGR	L	NOx	16.8375	17.7518	0.642724	0.642724	0.642724	0.642724
BGR	L	PM10	5.26982	5.26909	7.48056	7.48056	7.48056	7.48056
BGR	L	PM2.5	0.20477	0.204781	1.88245	1.88245	1.88245	1.88245
BGR	L	SO2	0.000201195	0.000204958	0.0792977	0.0792977	0.0792977	0.0792977
CYP	A	CH4	0.127001	0.117302	0.129357	0.125814	0.12097	0.121622
CYP	A	CO	0.377901	0.360304	0.31723	0.308541	0.296662	0.298261
CYP	A	CO2	3282.06	3003.73	3342.36	3250.81	3125.65	3142.5	3.11856	2.82287
CYP	A	NH3	0	0	0	0	0	0
CYP	A	NMVOC	0.0756069	0.0606119	0.0784364	0.0762879	0.0733507	0.0737461
CYP	A	NOx	3.90557	2.92489	3.62612	3.5268	3.39102	3.40929
CYP	A	PM10	0.347781	0.260048	0.301362	0.293107	0.281822	0.283341
CYP	A	PM2.5	0.237927	0.179841	0.206472	0.200817	0.193085	0.194126
CYP	A	SO2	14.1945	10.0698	15.373	14.9519	14.3762	14.4537
CYP	B	CH4	0.096902	0.115654	0.0915341	0.0858149	0.0915341	0.0714369
CYP	B	CO	2.36911	2.63721	2.48763	2.33033	2.48763	1.94145
CYP	B	CO2	1377.87	1840.54	1561.16	1463.56	1561.16	1218.39	1.54842	1.43484
CYP	B	NH3	0.0015183	0.00144087	0.00266155	0.00260229	0.00266155	0.00207718
CYP	B	NMVOC	0.28008	0.280193	0.270445	0.262617	0.270445	0.211066
CYP	B	NOx	1.74413	1.80224	2.69766	2.54428	2.69766	2.10536
CYP	B	PM10	0.803648	0.798309	1.00019	0.9364	1.00019	0.780589
CYP	B	PM2.5	0.283447	0.306459	0.569035	0.53329	0.569035	0.444098
CYP	B	SO2	1.36675	1.3975	1.23556	1.17557	1.23556	0.964281
CYP	C	CH4	0.387349	0.389942	0.237506	0.239901	0.237506	0.23232
CYP	C	CO	0.304546	0.274761	0.534284	0.542351	0.534284	0.543486
CYP	C	CO2	552.023	519.764	593.304	585.099	593.304	578.829	0.822419	0.818745
CYP	C	NH3	0.00346912	0.00298626	0.00493696	0.00499449	0.00493696	0.00502617
CYP	C	NMVOC	0.0405489	0.0372099	0.0563673	0.0570336	0.0563673	0.0572409
CYP	C	NOx	0.599344	0.569768	0.454837	0.44752	0.454837	0.459647
CYP	C	PM10	0.0522746	0.0476253	0.0690753	0.0700743	0.0690753	0.0701932
CYP	C	PM2.5	0.049575	0.0449846	0.067105	0.068082	0.067105	0.0681974
CYP	C	SO2	0.249648	0.234309	0.128166	0.127422	0.128166	0.129945
CYP	D	CH4	0	0	0	0	0	0
CYP	D	CO	0	0	0	0	0	0
CYP	D	CO2	0	0	0	0	0	0
CYP	D	NH3	0	0	0	0	0	0
CYP	D	NMVOC	0.419296	0.355931	0.589194	0.502022	0.589194	0.589194
CYP	D	NOx	0	0	0	0	0	0
CYP	D	PM10	0	0	0	0	0	0
CYP	D	PM2.5	0	0	0	0	0	0
CYP	D	SO2	0	0	0	0	0	0
CYP	E	CH4	0	0	0	0	0	0
CYP	E	CO	0.0589885	0.0499305	0.0613072	0.0613055	0.0613072	0.0613072
CYP	E	CO2	3.59806	3.54011	30.1283	30.1283	30.1283	30.1283
CYP	E	NH3	0.00439703	0.00374241	0.00456496	0.00456482	0.00456496	0.00456496
CYP	E	NMVOC	3.0468	3.10315	4.78747	4.75147	4.78747	4.78747
CYP	E	NOx	0.00190936	0.00162409	0.00198252	0.00198146	0.00198252	0.00198252
CYP	E	PM10	0.0371127	0.0277317	0.0394503	0.0394502	0.0394503	0.0394503
CYP	E	PM2.5	0.0330285	0.026107	0.0347682	0.0347682	0.0347682	0.0347682
CYP	E	SO2	0.000257071	0.000102263	0.000294701	0.000294636	0.000294701	0.000294701
CYP	F	CH4	0.135682	0.1033	0.146618	0.125201	0.146618	0.105924
CYP	F	CO	6.57889	5.06566	8.07723	6.91153	8.07723	5.83543
CYP	F	CO2	2123.84	1899.22	2081.05	1799.28	2081.05	1503.46	1.92052	1.81201
CYP	F	NH3	0.125621	0.0994895	0.179655	0.151747	0.179655	0.129793
CYP	F	NMVOC	1.92302	1.33558	2.18032	1.85429	2.18032	1.57518
CYP	F	NOx	5.78569	4.39999	5.86129	5.18154	5.86129	4.23451
CYP	F	PM10	0.434699	0.358181	0.447446	0.392766	0.447446	0.323259
CYP	F	PM2.5	0.309832	0.24653	0.331248	0.290364	0.331248	0.239311
CYP	F	SO2	0.0131243	0.0114226	0.0128879	0.0111691	0.0128879	0.00931088
CYP	H	CH4	0.00718495	0.0022849	6.21e-06	2.71118e-06	3.1164e-06	2.73936e-06
CYP	H	CO	0.278672	0.0909062	0.28715	0.125365	0.144102	0.126668
CYP	H	CO2	1027.45	326.74	105.472	46.0471	52.9294	46.5257	1.67857	0.598555
CYP	H	NH3	0	0	0	0	0	0
CYP	H	NMVOC	0.0288477	0.00930209	0.0320638	0.0139985	0.0160907	0.014144
CYP	H	NOx	0.473995	0.15374	0.483907	0.211266	0.242842	0.213461
CYP	H	PM10	0.00373011	0.00157522	0.00398659	0.00174048	0.00200061	0.00175857
CYP	H	PM2.5	0.00373011	0.00157522	0.00398659	0.00174048	0.00200061	0.00175857
CYP	H	SO2	0.0275416	0.0090143	0.0281263	0.0122795	0.0141148	0.0124071
CYP	I	CH4	0.000557865	0.000659736	0.000631512	0.000631512	0.000631512	0.000631512
CYP	I	CO	0.15913	0.154986	0.127036	0.122998	0.127036	0.127036
CYP	I	CO2	3.98873	4.71711	4.51531	4.51531	4.51531	4.51531
CYP	I	NH3	0.000103537	0.000102754	9.04952e-05	8.74966e-05	9.04952e-05	9.04952e-05
CYP	I	NMVOC	0.0551993	0.0526545	0.0433362	0.0420704	0.0433362	0.0433362
CYP	I	NOx	0.622014	0.578054	0.442762	0.430532	0.442762	0.442762
CYP	I	PM10	0.0379308	0.0350474	0.031307	0.0305184	0.031307	0.031307
CYP	I	PM2.5	0.0375474	0.0347505	0.031307	0.0305184	0.031307	0.031307
CYP	I	SO2	0.0974912	0.080306	0.0892001	0.0891926	0.0892001	0.0892001
CYP	J	CH4	23.447	23.757	22.3003	22.3003	22.3003	22.3003
CYP	J	CO	0.0399815	0.0403417	0.0394367	0.0394367	0.0394367	0.0394367
CYP	J	CO2	0	0	0	0	0	0
CYP	J	NH3	0.0927161	0.0957604	0.0113372	0.0113372	0.0113372	0.0113372
CYP	J	NMVOC	0.339232	0.344097	0.319456	0.319456	0.319456	0.319456
CYP	J	NOx	0.00227729	0.00229781	0.00224626	0.00224626	0.00224626	0.00224626
CYP	J	PM10	0.0252268	0.0271346	0.0288872	0.0288872	0.0288872	0.0288872
CYP	J	PM2.5	0.024927	0.0268357	0.0285841	0.0285841	0.0285841	0.0285841
CYP	J	SO2	7.87742e-05	7.94839e-05	7.77008e-05	7.77008e-05	7.77008e-05	7.77008e-05
CYP	K	CH4	13.1205	14.2245	12.4678	12.4678	12.4678	12.4678
CYP	K	CO	0	0	0	0	0	0
CYP	K	CO2	0	0	0	0	0	0
CYP	K	NH3	4.73124	4.95073	5.1033	5.1033	5.1033	5.1033
CYP	K	NMVOC	1.35022	1.51187	1.29383	1.29383	1.29383	1.29383
CYP	K	NOx	0.127282	0.134662	0	0	0	0
CYP	K	PM10	0.307234	0.31293	0.304054	0.304054	0.304054	0.304054
CYP	K	PM2.5	0.0644923	0.0673205	0.0632545	0.0632545	0.0632545	0.0632545
CYP	K	SO2	0	0	0	0	0	0
CYP	L	CH4	0.0162591	0.0157801	0.0184915	0.0184915	0.0184915	0.0184915
CYP	L	CO	0.0923381	0.127924	0.165	0.165	0.165	0.165
CYP	L	CO2	0	0	4.72345	4.72345	4.72345	4.72345
CYP	L	NH3	2.98192	3.08016	1.69917	1.69917	1.69917	1.69917
CYP	L	NMVOC	0.020535	0.0284489	0.51692	0.51692	0.51692	0.51692
CYP	L	NOx	0.965021	1.00074	0.00568966	0.00568966	0.00568966	0.00568966
CYP	L	PM10	0.0438848	0.0607974	0.0521084	0.0521084	0.0521084	0.0521084
CYP	L	PM2.5	0.00886003	0.0122746	0.0144407	0.0144407	0.0144407	0.0144407
CYP	L	SO2	0.00069219	0.00095895	0.000701976	0.000701976	0.000701976	0.000701976
CZE	A	CH4	1.30436	1.30908	1.32643	1.28469	1.29899	1.23786
CZE	A	CO	9.52055	8.37333	9.96604	9.65245	9.75987	9.3006
CZE	A	CO2	42954.7	36729	45485	44053.7	44544	42447.9	50.4589	43.5135
CZE	A	NH3	0.048676	0.050931	0.0721948	0.0699231	0.0707013	0.0673743
CZE	A	NMVOC	4.56804	3.96531	4.36526	4.2279	4.27495	4.07378
CZE	A	NOx	35.3429	28.5566	29.587	28.656	28.9749	27.6114
CZE	A	PM10	1.76636	1.31162	1.8449	1.78684	1.80673	1.72171
CZE	A	PM2.5	1.28529	0.954178	1.32336	1.28172	1.29598	1.235
CZE	A	SO2	37.7351	26.2402	37.1314	35.963	36.3632	34.6521
CZE	B	CH4	4.35286	4.06498	4.17359	4.05385	3.77656	3.43554
CZE	B	CO	146.637	145.345	150.59	144.774	136.264	123.96
CZE	B	CO2	26865.4	25492.5	30386.9	29306	27496.2	25013.4	18.4093	17.1135
CZE	B	NH3	0.483612	0.525604	0.646827	0.622018	0.585294	0.532444
CZE	B	NMVOC	8.20414	8.37721	6.99247	6.80016	6.32727	5.75593
CZE	B	NOx	26.0988	24.7618	23.2935	22.472	21.0775	19.1743
CZE	B	PM10	3.44528	3.22658	3.00364	2.88957	2.7179	2.47248
CZE	B	PM2.5	1.84593	1.70401	1.63689	1.57501	1.48117	1.34743
CZE	B	SO2	18.5011	19.5016	17.8483	17.2534	16.1504	14.692
CZE	C	CH4	36.2044	36.2751	38.1892	38.948	39.5922	40.4581
CZE	C	CO	553.486	538.541	587.086	598.899	608.783	622.293
CZE	C	CO2	11539	11263	20992.9	21068.2	21400.1	21429.4	12.2694	12.4771
CZE	C	NH3	5.50701	5.58402	5.26897	5.37023	5.45924	5.57415
CZE	C	NMVOC	77.5903	74.8879	105.351	107.415	109.181	111.533
CZE	C	NOx	20.6574	19.3751	23.5874	23.1084	23.4233	22.7242
CZE	C	PM10	25.8449	23.677	30.9262	31.5693	32.0939	32.8324
CZE	C	PM2.5	25.2625	23.1395	30.24	30.8723	31.3855	32.112
CZE	C	SO2	20.0317	16.7935	23.5053	23.6478	24.0236	24.1322
CZE	D	CH4	113.087	90.1873	107.223	91.5969	107.223	107.223
CZE	D	CO	0.087373	0.0950638	0.033689	0.0326835	0.033689	0.033689
CZE	D	CO2	81.281	52.5612	104.034	86.0825	104.034	104.034
CZE	D	NH3	0.00185	0.008539	0.00018	0.000174628	0.00018	0.00018
CZE	D	NMVOC	6.38269	5.04547	5.62339	4.78224	5.62339	5.62339
CZE	D	NOx	0.423022	0.569137	0.377528	0.36626	0.377528	0.377528
CZE	D	PM10	1.92584	1.50889	1.66673	1.37392	1.66673	1.66673
CZE	D	PM2.5	0.34563	0.283394	0.219923	0.184423	0.219923	0.219923
CZE	D	SO2	3.42196	3.9003	3.23943	3.14275	3.23943	3.23943
CZE	E	CH4	0	0	0	0	0	0
CZE	E	CO	1.20418	1.15605	1.21766	1.21766	1.21766	1.21766
CZE	E	CO2	158.433	133.439	154.475	154.475	154.475	154.475
CZE	E	NH3	0.0868957	0.084117	0.0880398	0.0880398	0.0880398	0.0880398
CZE	E	NMVOC	67.2936	52.8712	67.6874	67.067	67.6874	67.6874
CZE	E	NOx	0.0395243	0.0379106	0.0399585	0.0399585	0.0399585	0.0399585
CZE	E	PM10	1.2704	1.09533	1.25399	1.25399	1.25399	1.25399
CZE	E	PM2.5	0.931842	0.83216	0.926886	0.926886	0.926886	0.926886
CZE	E	SO2	0.0213095	0.0165648	0.0205886	0.0205886	0.0205886	0.0205886
CZE	F	CH4	1.01729	0.915078	0.776532	0.689196	0.666167	0.639771
CZE	F	CO	76.6833	64.9062	50.5935	44.9219	43.4029	41.6831
CZE	F	CO2	18485.4	17215.4	19757.7	17823.6	16949.6	16278	18.0764	17.858
CZE	F	NH3	0.860062	0.762204	0.995671	0.885269	0.854161	0.820315
CZE	F	NMVOC	11.8383	10.3927	5.92141	5.24351	5.07983	4.87855
CZE	F	NOx	51.2029	45.1938	47.8793	43.1805	41.0744	39.4469
CZE	F	PM10	3.87792	3.59623	4.04419	3.67679	3.46941	3.33194
CZE	F	PM2.5	2.72339	2.51925	2.76901	2.50657	2.37547	2.28134
CZE	F	SO2	0.13173	0.123141	0.130255	0.117279	0.111742	0.107314
CZE	H	CH4	0.088168	0.024396	7.107e-05	2.7675e-05	5.10688e-05	3.7438e-05
CZE	H	CO	2.71598	1.45421	0.197762	0.0770096	0.142106	0.104176
CZE	H	CO2	1297.5	358.9	166.462	64.8212	119.615	87.6883	2.01809	0.626616
CZE	H	NH3	0	0	0	0	0	0
CZE	H	NMVOC	0.118725	0.0631945	0.103204	0.040188	0.0741591	0.0543653
CZE	H	NOx	0.792635	0.264849	0.729562	0.284095	0.524241	0.384316
CZE	H	PM10	0.00594966	0.00251771	0.005568	0.00216821	0.004001	0.00293309
CZE	H	PM2.5	0.00594966	0.00251771	0.005568	0.00216821	0.004001	0.00293309
CZE	H	SO2	0.0492391	0.017277	0.012006	0.00467519	0.00862715	0.00632447
CZE	I	CH4	0.0455723	0.0522537	0.125197	0.125197	0.125197	0.125197
CZE	I	CO	28.6759	27.7135	27.9217	27.9016	27.9217	27.9217
CZE	I	CO2	606.346	635.029	1654.69	1654.69	1654.69	1654.69
CZE	I	NH3	0.00924791	0.0090351	0.00919426	0.00916795	0.00919426	0.00919426
CZE	I	NMVOC	3.32683	3.21556	3.27284	3.27102	3.27284	3.27284
CZE	I	NOx	16.7569	16.5204	16.9161	16.9041	16.9161	16.9161
CZE	I	PM10	1.38089	1.36446	1.37902	1.3787	1.37902	1.37902
CZE	I	PM2.5	1.30167	1.28587	1.30015	1.29983	1.30015	1.30015
CZE	I	SO2	0.00978922	0.00916328	0.0103101	0.0102443	0.0103101	0.0103101
CZE	J	CH4	189.854	190.191	211.967	211.967	211.967	211.967
CZE	J	CO	7.90887	7.8988	0.060657	0.060657	0.060657	0.060657
CZE	J	CO2	108.646	104.402	138.239	138.239	138.239	138.239
CZE	J	NH3	1.0432	1.04204	0.224186	0.224186	0.224186	0.224186
CZE	J	NMVOC	2.37287	2.30718	5.60423	5.60423	5.60423	5.60423
CZE	J	NOx	0.491128	0.50437	0.760541	0.760541	0.760541	0.760541
CZE	J	PM10	1.00596	1.0499	0.399771	0.399771	0.399771	0.399771
CZE	J	PM2.5	0.956012	1.00001	0.393444	0.393444	0.393444	0.393444
CZE	J	SO2	0.0174457	0.0172919	0.054931	0.054931	0.054931	0.054931
CZE	K	CH4	137.789	137.75	142.894	142.894	142.894	142.894
CZE	K	CO	0	0	0	0	0	0
CZE	K	CO2	0	0	0	0	0	0
CZE	K	NH3	24.2317	23.8452	27.3664	27.3664	27.3664	27.3664
CZE	K	NMVOC	35.9341	36.1209	20.4718	20.4718	20.4718	20.4718
CZE	K	NOx	0.696477	0.697909	0	0	0	0
CZE	K	PM10	1.15446	1.1481	1.2213	1.2213	1.2213	1.2213
CZE	K	PM2.5	0.235439	0.233707	0.262958	0.262958	0.262958	0.262958
CZE	K	SO2	0	0	0	0	0	0
CZE	L	CH4	0	0	0.016026	0.016026	0.016026	0.016026
CZE	L	CO	0	0	0.143	0.143	0.143	0.143
CZE	L	CO2	0	0	290.592	290.592	290.592	290.592
CZE	L	NH3	39.7255	36.5164	37.4029	37.4029	37.4029	37.4029
CZE	L	NMVOC	1.53822	1.62555	6.50005	6.50005	6.50005	6.50005
CZE	L	NOx	18.7502	17.1535	0.00493103	0.00493103	0.00493103	0.00493103
CZE	L	PM10	4.47838	4.44854	4.43028	4.43028	4.43028	4.43028
CZE	L	PM2.5	0.400024	0.395022	0.406042	0.406042	0.406042	0.406042
CZE	L	SO2	0	0	0.000608379	0.000608379	0.000608379	0.000608379
DEU	A	CH4	86.9327	88.4736	110.004	106.982	106.87	103.581
DEU	A	CO	91.419	84.7594	103.951	101.095	100.989	97.8815
DEU	A	CO2	214809	180749	296365	288223	287921	279060	243.217	211.342
DEU	A	NH3	0.655986	0.622803	0.685605	0.666769	0.666071	0.645573
DEU	A	NMVOC	7.17469	6.56006	7.94635	7.72805	7.71995	7.48237
DEU	A	NOx	208.575	186.93	239.65	233.067	232.822	225.657
DEU	A	PM10	4.39078	3.85726	4.48338	4.36021	4.35564	4.2216
DEU	A	PM2.5	4.04255	3.56976	4.10779	3.99494	3.99075	3.86794
DEU	A	SO2	99.7797	83.8436	110.384	107.351	107.239	103.939
DEU	B	CH4	42.1954	42.0968	41.062	39.2553	33.9934	33.5439
DEU	B	CO	887.478	784.397	1032.63	965.25	854.866	843.562
DEU	B	CO2	199097	185416	222896	208638	184526	182086	124.054	112.141
DEU	B	NH3	9.935	9.55565	12.0355	11.6695	9.96369	9.83193
DEU	B	NMVOC	51.5263	50.577	48.0695	45.9028	39.7946	39.2684
DEU	B	NOx	160.953	150.237	183.507	172.986	151.917	149.908
DEU	B	PM10	79.8209	76.9031	88.4319	82.6999	73.2089	72.2408
DEU	B	PM2.5	21.7722	20.9305	23.7287	22.2052	19.6439	19.3842
DEU	B	SO2	137.873	128.381	138.373	129.862	114.553	113.038
DEU	C	CH4	43.015	41.6657	40.0406	40.4175	41.1798	41.3146
DEU	C	CO	491.44	460.739	412.834	415.313	423.093	424.377
DEU	C	CO2	125394	123786	140145	138515	138747	138671	138.475	134.384
DEU	C	NH3	1.9483	1.95172	1.7154	1.69704	1.70168	1.70112
DEU	C	NMVOC	39.6274	37.9024	35.6372	35.8917	36.608	36.728
DEU	C	NOx	87.7216	86.3761	75.5675	74.6144	74.6139	74.5502
DEU	C	PM10	20.9753	19.5434	19.6071	19.7199	20.0867	20.1469
DEU	C	PM2.5	19.8115	18.4637	18.4729	18.5899	18.9457	19.0047
DEU	C	SO2	13.4722	12.8515	8.71942	8.7251	8.81566	8.82905
DEU	D	CH4	200.444	194.991	243.357	239.742	243.357	243.357
DEU	D	CO	5.30522	4.3685	0.583048	0.555985	0.583048	0.583048
DEU	D	CO2	1381.45	1185.64	1341.99	1322.48	1341.99	1341.99
DEU	D	NH3	0.00214627	0.00191537	0	0	0	0
DEU	D	NMVOC	35.2589	33.1738	39.3006	36.0533	39.3006	39.3006
DEU	D	NOx	1.79038	1.66225	1.13017	1.06731	1.13017	1.13017
DEU	D	PM10	3.6739	3.02949	4.10758	3.7979	4.10758	4.10758
DEU	D	PM2.5	0.768215	0.646163	0.634133	0.586655	0.634133	0.634133
DEU	D	SO2	5.9688	5.74982	5.16577	4.87132	5.16577	5.16577
DEU	E	CH4	1.31787	0.933325	1.40342	1.40342	1.40342	1.40342
DEU	E	CO	13.3077	13.5264	26.8094	26.8094	26.8094	26.8094
DEU	E	CO2	1946.01	1926.68	2033.56	2033.56	2033.56	2033.56
DEU	E	NH3	0.617009	0.638629	1.25404	1.25404	1.25404	1.25404
DEU	E	NMVOC	502.877	489.132	549.016	537.866	549.016	549.016
DEU	E	NOx	0.218612	0.217268	0.435665	0.435665	0.435665	0.435665
DEU	E	PM10	4.73396	2.89569	9.64879	9.64879	9.64879	9.64879
DEU	E	PM2.5	4.37382	2.8463	7.41955	7.41955	7.41955	7.41955
DEU	E	SO2	0.118487	0.0180566	0.140314	0.140314	0.140314	0.140314
DEU	F	CH4	8.97109	8.34579	8.36448	6.99524	6.69993	6.44624
DEU	F	CO	925.743	780.138	862.681	725.82	691.005	664.841
DEU	F	CO2	157437	141283	167975	147147	134548	129453	150.481	149.138
DEU	F	NH3	9.78391	8.55401	8.23262	6.99314	6.59431	6.34462
DEU	F	NMVOC	87.2979	82.1827	69.3343	58.091	55.5366	53.4338
DEU	F	NOx	435.691	354.754	421.659	362.909	337.748	324.959
DEU	F	PM10	28.735	25.6371	26.2417	23.0105	21.0195	20.2236
DEU	F	PM2.5	18.5872	16.5127	15.9438	13.9698	12.7709	12.2874
DEU	F	SO2	0.825901	0.752614	0.835988	0.732787	0.669625	0.64427
DEU	H	CH4	0.253834	0.130481	0.0800317	0.0352635	0.0405484	0.0437004
DEU	H	CO	9.16934	4.50959	16.4798	7.26133	8.34958	8.99863
DEU	H	CO2	31851.3	14660.7	2844.59	1253.38	1441.22	1553.25	29.9279	13.6558
DEU	H	NH3	0.165969	0.0735277	0.167259	0.0736976	0.0847427	0.0913301
DEU	H	NMVOC	1.01533	0.521925	1.34517	0.592708	0.681537	0.734516
DEU	H	NOx	14.5773	6.52299	14.0854	6.20629	7.13643	7.69117
DEU	H	PM10	0.102275	0.047505	0.1075	0.0473666	0.0544654	0.0586992
DEU	H	PM2.5	0.102275	0.047505	0.1075	0.0473666	0.0544654	0.0586992
DEU	H	SO2	0.820098	0.363325	0.820844	0.361679	0.415884	0.448212
DEU	I	CH4	0.264147	0.175813	1.17967	1.17375	1.17967	1.17967
DEU	I	CO	303.972	308.363	316.177	308.373	316.177	316.177
DEU	I	CO2	2504.67	1921.29	11468.1	11277.3	11468.1	11468.1
DEU	I	NH3	0.0531901	0.0475808	0.0379682	0.0375537	0.0379682	0.0379682
DEU	I	NMVOC	25.3493	25.7412	26.4648	26.2591	26.4648	26.4648
DEU	I	NOx	62.9215	61.4468	62.0886	61.4481	62.0886	62.0886
DEU	I	PM10	13.1089	12.3888	13.7716	13.722	13.7716	13.7716
DEU	I	PM2.5	8.87646	8.4399	9.58352	9.53394	9.58352	9.58352
DEU	I	SO2	0.324214	0.287206	0.296735	0.295778	0.296735	0.296735
DEU	J	CH4	335.938	318.741	353.96	353.96	353.96	353.96
DEU	J	CO	18.6249	7.93919	19.5502	19.5502	19.5502	19.5502
DEU	J	CO2	0	0	0	0	0	0
DEU	J	NH3	3.54086	3.54235	3.5966	3.5966	3.5966	3.5966
DEU	J	NMVOC	18.9658	10.0806	19.9121	19.9121	19.9121	19.9121
DEU	J	NOx	0.830151	0.707083	0.829782	0.829782	0.829782	0.829782
DEU	J	PM10	6.88693	4.85953	7.05712	7.05712	7.05712	7.05712
DEU	J	PM2.5	6.23712	4.57823	6.37495	6.37495	6.37495	6.37495
DEU	J	SO2	0.138222	0.10722	0.139399	0.139399	0.139399	0.139399
DEU	K	CH4	1227.37	1213.53	1248.02	1248.02	1248.02	1248.02
DEU	K	CO	0	0	0	0	0	0
DEU	K	CO2	0	0	0	0	0	0
DEU	K	NH3	251.43	249.17	267.014	267.014	267.014	267.014
DEU	K	NMVOC	293.493	289.791	316.494	316.494	316.494	316.494
DEU	K	NOx	1.37908	1.36511	0	0	0	0
DEU	K	PM10	13.02	12.9059	13.1852	13.1852	13.1852	13.1852
DEU	K	PM2.5	3.7938	3.72182	3.8005	3.8005	3.8005	3.8005
DEU	K	SO2	0	0	0	0	0	0
DEU	L	CH4	0	0	58.8109	58.8109	58.8109	58.8109
DEU	L	CO	0	0	0.73	0.73	0.73	0.73
DEU	L	CO2	0	0	2931.62	2931.62	2931.62	2931.62
DEU	L	NH3	296.86	263.104	339.718	339.718	339.718	339.718
DEU	L	NMVOC	8.55855	9.1562	67.8168	67.8168	67.8168	67.8168
DEU	L	NOx	109.414	107.38	0.0251724	0.0251724	0.0251724	0.0251724
DEU	L	PM10	17.4141	17.2713	17.4219	17.4219	17.4219	17.4219
DEU	L	PM2.5	0.669772	0.66428	0.731921	0.731921	0.731921	0.731921
DEU	L	SO2	0	0	0.00310571	0.00310571	0.00310571	0.00310571
DNK	A	CH4	4.54447	3.33211	2.91888	2.9455	3.00124	2.72629
DNK	A	CO	13.4208	13.6267	14.4975	14.6298	14.9066	13.541
DNK	A	CO2	6580.38	5654.43	19080.5	19254.5	19618.9	17821.5	7.09097	6.27653
DNK	A	NH3	0.0138213	0.0130136	0.0154945	0.0156358	0.0159317	0.0144722
DNK	A	NMVOC	1.07952	0.81421	0.774277	0.78134	0.796126	0.72319
DNK	A	NOx	10.5611	9.65321	8.64107	8.71989	8.88491	8.07093
DNK	A	PM10	0.48655	0.490291	0.472582	0.476893	0.485918	0.441401
DNK	A	PM2.5	0.366911	0.370925	0.361311	0.364607	0.371507	0.337472
DNK	A	SO2	2.05834	1.94342	1.75959	1.77564	1.80924	1.64349
DNK	B	CH4	1.08779	1.03482	1.0267	1.04603	0.82935	0.818477
DNK	B	CO	8.3328	9.26822	8.36014	8.21365	6.7532	6.66467
DNK	B	CO2	7362.89	6959.73	8272.77	8147.05	6682.62	6595.02	6.38876	6.1533
DNK	B	NH3	0.558588	0.557107	0.774249	0.755626	0.625427	0.617228
DNK	B	NMVOC	3.32311	3.11411	3.87595	3.95663	3.13094	3.08989
DNK	B	NOx	10.8411	9.71982	10.9627	10.7391	8.85548	8.73939
DNK	B	PM10	2.44956	2.77239	4.28292	4.16949	3.45968	3.41433
DNK	B	PM2.5	0.695961	0.767162	0.917972	0.89546	0.741524	0.731803
DNK	B	SO2	3.56052	3.77879	4.1164	4.03347	3.32517	3.28157
DNK	C	CH4	4.2881	3.983	4.18895	4.23102	4.32979	4.32757
DNK	C	CO	60.3115	55.5695	71.5506	72.9397	74.8478	75.0047
DNK	C	CO2	4789.12	4527.57	7583.31	7647.4	7867.54	7852.32	4.15179	4.09481
DNK	C	NH3	1.36325	1.27534	1.66144	1.68791	1.73168	1.73341
DNK	C	NMVOC	9.42574	8.69459	10.9675	11.1659	11.4416	11.4634
DNK	C	NOx	5.03622	4.75336	5.11204	5.14959	5.29127	5.2802
DNK	C	PM10	7.88899	7.28521	9.42857	9.59193	9.83602	9.85113
DNK	C	PM2.5	7.76495	7.17455	9.26096	9.42218	9.66141	9.67661
DNK	C	SO2	1.12526	1.04228	0.974646	0.987088	1.00889	1.00949
DNK	D	CH4	3.09536	2.12964	3.21913	3.17299	3.21913	3.21913
DNK	D	CO	0.169457	0.118744	0.201827	0.192087	0.201827	0.201827
DNK	D	CO2	194.717	126.262	232.438	221.224	232.438	232.438
DNK	D	NH3	0	0	0	0	0	0
DNK	D	NMVOC	7.49852	7.07347	7.4282	7.09507	7.4282	7.4282
DNK	D	NOx	0.100709	0.0660054	0.120993	0.115154	0.120993	0.120993
DNK	D	PM10	0.0343001	0.0165956	0.127652	0.117817	0.127652	0.127652
DNK	D	PM2.5	0.0117379	0.00607148	0.0162981	0.0151442	0.0162981	0.0162981
DNK	D	SO2	0.891439	0.772623	1.28483	1.22283	1.28483	1.28483
DNK	E	CH4	0.0995988	0.0798487	0.0926027	0.0926027	0.0926027	0.0926027
DNK	E	CO	2.60983	1.91945	2.23888	2.23888	2.23888	2.23888
DNK	E	CO2	162.479	170.415	161.552	161.552	161.552	161.552
DNK	E	NH3	0.0275746	0.0230615	0.0265853	0.0265853	0.0265853	0.0265853
DNK	E	NMVOC	24.9721	30.7629	27.2652	27.264	27.2652	27.2652
DNK	E	NOx	0.0414869	0.0307586	0.0364301	0.0364301	0.0364301	0.0364301
DNK	E	PM10	0.297846	0.272479	0.359387	0.359387	0.359387	0.359387
DNK	E	PM2.5	0.230454	0.205309	0.260492	0.260492	0.260492	0.260492
DNK	E	SO2	0.0410868	0.0313076	0.0393677	0.0393677	0.0393677	0.0393677
DNK	F	CH4	0.360575	0.325029	0.206867	0.17514	0.170694	0.158533
DNK	F	CO	57.7955	50.7125	40.5723	34.5657	33.4778	31.0927
DNK	F	CO2	12266.3	11290.7	13245.6	11644.3	10929.4	10150.8	12.1737	12.3072
DNK	F	NH3	0.839936	0.732813	0.64237	0.548895	0.530045	0.492282
DNK	F	NMVOC	6.02996	5.43358	3.53172	2.98913	2.91416	2.70654
DNK	F	NOx	26.9963	22.4817	23.2132	19.9709	19.1541	17.7895
DNK	F	PM10	2.16446	1.96048	1.97581	1.72227	1.63032	1.51417
DNK	F	PM2.5	1.39251	1.23613	1.20089	1.04502	0.990905	0.920309
DNK	F	SO2	0.0760108	0.069892	0.077243	0.0679104	0.0637362	0.0591954
DNK	H	CH4	0.013208	0.00446355	0.00170171	0.000657146	0.00116961	0.000895026
DNK	H	CO	1.80563	1.20458	1.83228	0.707569	1.25935	0.963701
DNK	H	CO2	3299.12	1082.5	378.072	145.999	259.854	198.849	3.84197	1.38472
DNK	H	NH3	6.48829e-05	7.08537e-05	7.8765e-05	3.04165e-05	5.41362e-05	4.1427e-05
DNK	H	NMVOC	0.129658	0.0536983	0.134593	0.0519756	0.0925077	0.0707902
DNK	H	NOx	1.61458	0.58981	1.73853	0.671363	1.19491	0.914389
DNK	H	PM10	0.0120849	0.00449867	0.0130443	0.0050373	0.00896553	0.00686074
DNK	H	PM2.5	0.0120849	0.00449867	0.0130443	0.0050373	0.00896553	0.00686074
DNK	H	SO2	0.117917	0.0442191	0.120157	0.0464007	0.0825853	0.0631972
DNK	I	CH4	0.0127429	0.013539	0.157898	0.157805	0.157898	0.157898
DNK	I	CO	55.647	53.4405	59.1901	59.1711	59.1901	59.1901
DNK	I	CO2	426.216	443.98	2217.88	2215.18	2217.88	2217.88
DNK	I	NH3	0.00590513	0.00590503	0.00700502	0.00699788	0.00700502	0.00700502
DNK	I	NMVOC	3.63728	3.45208	3.82239	3.81952	3.82239	3.82239
DNK	I	NOx	13.5647	12.8415	10.4518	10.4396	10.4518	10.4518
DNK	I	PM10	0.759396	0.689043	0.669489	0.668491	0.669489	0.669489
DNK	I	PM2.5	0.759021	0.688679	0.669489	0.668491	0.669489	0.669489
DNK	I	SO2	0.25478	0.260796	0.0744151	0.0743988	0.0744151	0.0744151
DNK	J	CH4	37.3893	39.2635	39.141	39.141	39.141	39.141
DNK	J	CO	1.37523	1.36667	1.15168	1.15168	1.15168	1.15168
DNK	J	CO2	26.4667	26.4115	21.2345	21.2345	21.2345	21.2345
DNK	J	NH3	0.690473	0.687722	0.670449	0.670449	0.670449	0.670449
DNK	J	NMVOC	0.592313	0.578107	0.487953	0.487953	0.487953	0.487953
DNK	J	NOx	0.10458	0.103617	0.0915204	0.0915204	0.0915204	0.0915204
DNK	J	PM10	0.312172	0.31831	0.269079	0.269079	0.269079	0.269079
DNK	J	PM2.5	0.311832	0.318	0.268797	0.268797	0.268797	0.268797
DNK	J	SO2	0.973594	0.954622	0.644731	0.644731	0.644731	0.644731
DNK	K	CH4	234.959	236.318	240.572	240.572	240.572	240.572
DNK	K	CO	0	0	0	0	0	0
DNK	K	CO2	0	0	0	0	0	0
DNK	K	NH3	32.6834	32.657	35.2045	35.2045	35.2045	35.2045
DNK	K	NMVOC	37.9408	38.0838	53.0116	53.0116	53.0116	53.0116
DNK	K	NOx	0.774132	0.750323	0	0	0	0
DNK	K	PM10	2.5126	2.56196	2.50506	2.50506	2.50506	2.50506
DNK	K	PM2.5	0.548764	0.549067	0.556489	0.556489	0.556489	0.556489
DNK	K	SO2	0	0	0	0	0	0
DNK	L	CH4	0.153768	0.153764	0.0142328	0.0142328	0.0142328	0.0142328
DNK	L	CO	3.79864	3.79854	0.127	0.127	0.127	0.127
DNK	L	CO2	0	0	247.285	247.285	247.285	247.285
DNK	L	NH3	38.9498	40.3025	38.1072	38.1072	38.1072	38.1072
DNK	L	NMVOC	8.19174	8.13573	13.003	13.003	13.003	13.003
DNK	L	NOx	18.2738	19.0026	0.00437931	0.00437931	0.00437931	0.00437931
DNK	L	PM10	6.34521	5.97905	5.80758	5.80758	5.80758	5.80758
DNK	L	PM2.5	0.770474	0.742288	0.467374	0.467374	0.467374	0.467374
DNK	L	SO2	0.0284756	0.0284748	0.000540309	0.000540309	0.000540309	0.000540309
ESP	A	CH4	2.41813	1.99706	3.10771	2.97405	2.96072	2.74379
ESP	A	CO	24.1616	26.1976	31.6254	30.2652	30.1296	27.922
ESP	A	CO2	43570.7	32025.5	62483.3	59796	59528	55166.3	55.0778	43.0682
ESP	A	NH3	1.30968	1.57208	1.50252	1.4379	1.43145	1.32657
ESP	A	NMVOC	8.42108	8.97307	9.82491	9.40234	9.3602	8.67438
ESP	A	NOx	42.6109	31.2584	50.1638	48.0062	47.7911	44.2894
ESP	A	PM10	3.58525	3.65336	4.76345	4.55858	4.53815	4.20564
ESP	A	PM2.5	2.88241	2.88365	3.58095	3.42694	3.41158	3.16161
ESP	A	SO2	22.9802	9.02876	59.5766	57.0143	56.7587	52.6
ESP	B	CH4	50.8584	41.2891	50.4517	47.8968	38.8452	37.1217
ESP	B	CO	328.783	255.933	493.685	453.772	380.112	363.247
ESP	B	CO2	76719.2	67299.7	80970.9	75109.4	62343.4	59577.4	62.2487	55.9821
ESP	B	NH3	3.46871	2.72006	2.29484	2.17001	1.7669	1.68851
ESP	B	NMVOC	61.9297	55.1718	55.1044	52.8217	42.4275	40.5451
ESP	B	NOx	120.665	103.744	109.802	101.466	84.5414	80.7906
ESP	B	PM10	30.6455	28.9291	26.7183	24.7157	20.5717	19.659
ESP	B	PM2.5	16.3947	14.9567	13.3314	12.4087	10.2645	9.80906
ESP	B	SO2	70.2666	57.7248	67.8372	63.0762	52.2311	49.9138
ESP	C	CH4	32.3044	32.1238	37.9104	37.7689	38.9454	39.1011
ESP	C	CO	308.181	303.31	423.831	431.321	454.537	457.368
ESP	C	CO2	36366.6	36052.2	37313	35958.8	35773.3	35781.1	35.4514	35.0251
ESP	C	NH3	5.17534	5.17366	7.37873	7.53691	7.97338	8.02619
ESP	C	NMVOC	28.2646	28.0683	38.7927	39.3057	41.2077	41.442
ESP	C	NOx	48.3768	48.1881	47.6607	46.27	45.8484	45.8264
ESP	C	PM10	37.6611	37.3769	51.9974	52.6698	55.2394	55.5565
ESP	C	PM2.5	36.4607	36.2237	50.5155	51.2285	53.7887	54.1035
ESP	C	SO2	18.3534	17.9274	19.1555	17.6091	16.6059	16.5123
ESP	D	CH4	8.63188	7.59963	7.13049	6.91198	7.13049	7.13049
ESP	D	CO	2.03355	1.55216	1.50644	1.35556	1.50644	1.50644
ESP	D	CO2	3625.84	3534.97	3783.65	3752.46	3783.65	3783.65
ESP	D	NH3	0.0109883	0.00767807	0.00760817	0.00684617	0.00760817	0.00760817
ESP	D	NMVOC	23.3723	19.2598	19.4831	18.4133	19.4831	19.4831
ESP	D	NOx	4.97961	3.93224	5.00559	4.50425	5.00559	5.00559
ESP	D	PM10	0.457139	0.289253	0.507274	0.457422	0.507274	0.507274
ESP	D	PM2.5	0.207924	0.134172	0.220648	0.198696	0.220648	0.220648
ESP	D	SO2	23.7105	21.4928	25.1343	22.6169	25.1343	25.1343
ESP	E	CH4	0	0	0	0	0	0
ESP	E	CO	3.80059	3.24404	4.0757	4.0757	4.0757	4.0757
ESP	E	CO2	795.706	738.321	858.756	858.756	858.756	858.756
ESP	E	NH3	0.284045	0.24327	0.304723	0.304723	0.304723	0.304723
ESP	E	NMVOC	230.228	229.453	283.001	276.938	283.001	283.001
ESP	E	NOx	0.124265	0.106028	0.133255	0.133255	0.133255	0.133255
ESP	E	PM10	2.25741	1.78013	2.39978	2.39978	2.39978	2.39978
ESP	E	PM2.5	2.06082	1.68534	2.19943	2.19943	2.19943	2.19943
ESP	E	SO2	0.0123739	0.00596659	0.012611	0.012611	0.012611	0.012611
ESP	F	CH4	4.37132	3.52204	2.73612	2.00334	1.94478	1.80402
ESP	F	CO	249.903	175.617	112.053	85.8357	79.6449	73.8802
ESP	F	CO2	83747.7	69116.2	85820.4	67033.4	60999.5	56584.4	84.8289	75.6051
ESP	F	NH3	2.64505	2.10343	1.90467	1.41944	1.3538	1.25581
ESP	F	NMVOC	25.8147	18.9549	9.30029	6.78166	6.61047	6.13201
ESP	F	NOx	277.851	219.674	193.181	147.006	137.31	127.371
ESP	F	PM10	19.4676	15.494	11.4013	8.81501	8.10381	7.51726
ESP	F	PM2.5	14.9837	11.7508	7.40551	5.69314	5.26369	4.88271
ESP	F	SO2	0.341193	0.277011	0.413948	0.324368	0.294227	0.272931
ESP	H	CH4	0.15854	0.0583521	0.0453834	0.0203024	0.0286166	0.0245331
ESP	H	CO	6.2179	2.35698	6.06222	2.71195	3.82254	3.27708
ESP	H	CO2	22111.5	7939.63	2285.87	1022.59	1441.36	1235.68	26.8197	9.87289
ESP	H	NH3	0	0	0	0	0	0
ESP	H	NMVOC	0.750318	0.261976	0.770719	0.344784	0.485979	0.416631
ESP	H	NOx	8.85616	3.2212	8.61578	3.8543	5.43269	4.65746
ESP	H	PM10	0.062731	0.0236905	0.0619368	0.0277077	0.0390544	0.0334814
ESP	H	PM2.5	0.062731	0.0236905	0.0619368	0.0277077	0.0390544	0.0334814
ESP	H	SO2	0.537828	0.193639	0.523371	0.234132	0.330012	0.28292
ESP	I	CH4	0.0282246	0.0228365	0.608487	0.606931	0.608487	0.608487
ESP	I	CO	51.639	49.8246	44.1108	43.7721	44.1108	44.1108
ESP	I	CO2	824.462	704.01	11513.3	11354.8	11513.3	11513.3
ESP	I	NH3	0.0307819	0.0300933	0.0279097	0.0275188	0.0279097	0.0279097
ESP	I	NMVOC	13.4567	12.7215	11.216	11.1539	11.216	11.216
ESP	I	NOx	71.7252	65.8059	59.2701	58.5923	59.2701	59.2701
ESP	I	PM10	2.6213	2.29613	2.54801	2.51394	2.54801	2.54801
ESP	I	PM2.5	2.54995	2.22647	2.53831	2.50424	2.53831	2.53831
ESP	I	SO2	0.866899	0.856476	0.159658	0.158681	0.159658	0.159658
ESP	J	CH4	478.437	471.745	470.604	470.604	470.604	470.604
ESP	J	CO	590.439	590.435	0.739667	0.739667	0.739667	0.739667
ESP	J	CO2	0	0	0	0	0	0
ESP	J	NH3	3.3922	3.40757	1.80166	1.80166	1.80166	1.80166
ESP	J	NMVOC	13.0186	12.9808	3.76724	3.76724	3.76724	3.76724
ESP	J	NOx	46.9851	47.0148	0.176064	0.176064	0.176064	0.176064
ESP	J	PM10	47.4408	47.2485	1.28827	1.28827	1.28827	1.28827
ESP	J	PM2.5	44.8068	44.6144	1.27676	1.27676	1.27676	1.27676
ESP	J	SO2	1.94846	1.95358	0.234071	0.234071	0.234071	0.234071
ESP	K	CH4	918.18	933.45	978.553	978.553	978.553	978.553
ESP	K	CO	0	0	0	0	0	0
ESP	K	CO2	0	0	0	0	0	0
ESP	K	NH3	203.747	205.98	208.122	208.122	208.122	208.122
ESP	K	NMVOC	77.8562	77.6921	78.6942	78.6942	78.6942	78.6942
ESP	K	NOx	5.38336	5.36964	0	0	0	0
ESP	K	PM10	11.6336	11.8463	11.4182	11.4182	11.4182	11.4182
ESP	K	PM2.5	1.77846	1.78191	1.75248	1.75248	1.75248	1.75248
ESP	K	SO2	0	0	0	0	0	0
ESP	L	CH4	17.5519	17.5519	17.9166	17.9166	17.9166	17.9166
ESP	L	CO	19.7446	19.7446	10.634	10.634	10.634	10.634
ESP	L	CO2	0	0	709.91	709.91	709.91	709.91
ESP	L	NH3	247.278	258.961	255.334	255.334	255.334	255.334
ESP	L	NMVOC	85.7527	85.7501	90.6598	90.6598	90.6598	90.6598
ESP	L	NOx	73.1033	75.5024	0.36669	0.36669	0.36669	0.36669
ESP	L	PM10	28.1878	28.1878	42.5638	42.5638	42.5638	42.5638
ESP	L	PM2.5	2.61776	2.61776	2.50887	2.50887	2.50887	2.50887
ESP	L	SO2	0.148011	0.148011	0.0452413	0.0452413	0.0452413	0.0452413
EST	A	CH4	0.410282	0.460192	0.742195	0.725064	0.72558	0.680157
EST	A	CO	19.0239	19.5803	6.09941	5.95863	5.96287	5.58958
EST	A	CO2	6557.07	4248.86	14872.8	14529.5	14539.9	13629.6	10.2365	6.06836
EST	A	NH3	0.019387	0.017803	0.196199	0.191671	0.191807	0.179799
EST	A	NMVOC	1.0459	1.09732	0.347966	0.339935	0.340177	0.318881
EST	A	NOx	7.4524	6.18239	9.0574	8.84835	8.85465	8.30033
EST	A	PM10	2.8862	2.63833	2.9928	2.92373	2.92581	2.74264
EST	A	PM2.5	2.37405	2.30986	1.82431	1.78221	1.78347	1.67182
EST	A	SO2	15.4345	8.51841	23.5818	23.0375	23.0539	21.6106
EST	B	CH4	0.120827	0.0931041	0.237527	0.22261	0.197901	0.189887
EST	B	CO	37.5974	41.1221	39.7611	37.3359	33.128	31.7864
EST	B	CO2	2710.16	2172.94	2910.27	2729.14	2424.77	2326.57	1.03354	0.98798
EST	B	NH3	0.327074	0.326382	0.548589	0.515874	0.457071	0.438561
EST	B	NMVOC	1.59446	1.46452	1.79566	1.76128	1.4961	1.43552
EST	B	NOx	1.44843	1.07324	2.64651	2.4917	2.20501	2.11571
EST	B	PM10	1.96417	1.8577	3.44798	3.23651	2.87278	2.75644
EST	B	PM2.5	0.543356	0.526401	1.5732	1.47796	1.31075	1.25767
EST	B	SO2	3.00773	2.20063	6.55537	6.15263	5.46178	5.24059
EST	C	CH4	4.89881	5.12408	5.03122	5.09821	5.21313	5.25077
EST	C	CO	64.8532	65.7902	68.1172	69.0415	70.6022	71.1183
EST	C	CO2	723.589	699.697	2123.86	2144.53	2190.63	2203.63	0.757309	0.704958
EST	C	NH3	0.052838	0.055647	0.086082	0.083949	0.0848927	0.0842976
EST	C	NMVOC	3.16229	3.17689	3.29589	3.34085	3.41644	3.4415
EST	C	NOx	5.00639	5.03931	5.20456	5.2558	5.36689	5.39872
EST	C	PM10	2.33112	2.52253	2.57332	2.59521	2.64875	2.66315
EST	C	PM2.5	2.24251	2.42596	2.43786	2.46109	2.51273	2.52732
EST	C	SO2	0.451495	0.402403	0.58377	0.579909	0.585131	0.584514
EST	D	CH4	0.837073	0.747061	0.658184	0.658184	0.658184	0.658184
EST	D	CO	0.134326	0.099953	0.171304	0.170793	0.171304	0.171304
EST	D	CO2	0.0317833	0.0283656	0.0292852	0.0292852	0.0292852	0.0292852
EST	D	NH3	0.096889	0.074779	0.156825	0.156814	0.156825	0.156825
EST	D	NMVOC	0.860965	0.898861	1.0929	1.02276	1.0929	1.0929
EST	D	NOx	0.021939	0.016186	0.02428	0.0242746	0.02428	0.02428
EST	D	PM10	0.045164	0.041248	0.067155	0.0660478	0.067155	0.067155
EST	D	PM2.5	0.00985	0.00912	0.012808	0.0121806	0.012808	0.012808
EST	D	SO2	0.025474	0.018651	0.029474	0.0294249	0.029474	0.029474
EST	E	CH4	0	0	0	0	0	0
EST	E	CO	0.0977035	0.088055	0.097084	0.097084	0.097084	0.097084
EST	E	CO2	26.5385	31.5013	23.8136	23.8136	23.8136	23.8136
EST	E	NH3	0.00870546	0.007837	0.008877	0.008877	0.008877	0.008877
EST	E	NMVOC	9.45953	11.2676	8.35087	8.29087	8.35087	8.35087
EST	E	NOx	0.003125	0.003282	0.003139	0.003139	0.003139	0.003139
EST	E	PM10	0.092811	0.050614	0.0974841	0.0974841	0.0974841	0.0974841
EST	E	PM2.5	0.069197	0.045498	0.072055	0.072055	0.072055	0.072055
EST	E	SO2	0.001483	0.000322	0.001612	0.00161236	0.001612	0.001612
EST	F	CH4	0.143622	0.117399	0.134464	0.125721	0.126135	0.116983
EST	F	CO	10.7777	8.26551	10.8895	10.1459	10.215	9.47381
EST	F	CO2	2319.23	2150.66	2377.12	2232.07	2229.87	2068.08	2.37381	2.46987
EST	F	NH3	0.139446	0.111307	0.136325	0.126824	0.12788	0.118602
EST	F	NMVOC	1.35661	1.08746	1.38131	1.28666	1.29574	1.20173
EST	F	NOx	6.82772	6.34559	7.21472	6.82721	6.7678	6.27676
EST	F	PM10	0.504932	0.478433	0.520185	0.489575	0.487962	0.452557
EST	F	PM2.5	0.364567	0.345074	0.382205	0.35942	0.358529	0.332516
EST	F	SO2	0.008334	0.011072	0.009743	0.00914828	0.00913946	0.00847634
EST	H	CH4	0.00190553	0.000705785	7.28e-05	3.34453e-05	4.5582e-05	3.2571e-05
EST	H	CO	0.192878	0.101334	0.194567	0.0893867	0.121823	0.0870501
EST	H	CO2	214.213	75.6695	28.8827	13.2691	18.0842	12.9223	0.362781	0.140316
EST	H	NH3	0	0	0	0	0	0
EST	H	NMVOC	0.015175	0.007739	0.016231	0.00745674	0.0101626	0.00726182
EST	H	NOx	0.085488	0.033506	0.093256	0.042843	0.05839	0.0417231
EST	H	PM10	0.00048	0.000197	0.000549	0.000252218	0.000343743	0.000245625
EST	H	PM2.5	0.00048	0.000197	0.000549	0.000252218	0.000343743	0.000245625
EST	H	SO2	0.008245	0.003103	0.009277	0.00426198	0.00580857	0.00415057
EST	I	CH4	0.00191537	0.00176423	0.0156298	0.0156298	0.0156298	0.0156298
EST	I	CO	6.23914	3.08784	4.4234	4.38423	4.4234	4.4234
EST	I	CO2	33.6311	31.0822	278.385	278.385	278.385	278.385
EST	I	NH3	0.000951	0.000939	0.00116	0.00113093	0.00116	0.00116
EST	I	NMVOC	0.500397	0.413285	1.02924	1.01696	1.02924	1.02924
EST	I	NOx	2.19136	1.99371	5.00571	4.88708	5.00571	5.00571
EST	I	PM10	0.08286	0.074656	0.293964	0.286315	0.293964	0.293964
EST	I	PM2.5	0.081703	0.073585	0.293404	0.285755	0.293404	0.293404
EST	I	SO2	0.00362	0.003636	0.001742	0.00174069	0.001742	0.001742
EST	J	CH4	10.2244	9.81257	10.8766	10.8766	10.8766	10.8766
EST	J	CO	0.078388	0.082885	0.007046	0.007046	0.007046	0.007046
EST	J	CO2	0.565042	0.492933	1.08363	1.08363	1.08363	1.08363
EST	J	NH3	0.0495503	0.046787	0.04211	0.04211	0.04211	0.04211
EST	J	NMVOC	0.196259	0.219797	0.165649	0.165649	0.165649	0.165649
EST	J	NOx	0.025637	0.040281	0.023375	0.023375	0.023375	0.023375
EST	J	PM10	0.0569144	0.0495958	0.107482	0.107482	0.107482	0.107482
EST	J	PM2.5	0.0554698	0.0481526	0.091487	0.091487	0.091487	0.091487
EST	J	SO2	0.074984	0.013659	0.077164	0.077164	0.077164	0.077164
EST	K	CH4	27.2934	27.4601	26.999	26.999	26.999	26.999
EST	K	CO	0	0	0	0	0	0
EST	K	CO2	0	0	0	0	0	0
EST	K	NH3	4.97381	4.87546	4.50666	4.50666	4.50666	4.50666
EST	K	NMVOC	4.4306	4.56931	4.70872	4.70872	4.70872	4.70872
EST	K	NOx	0.037094	0.041878	0	0	0	0
EST	K	PM10	0.237286	0.243798	0.239915	0.239915	0.239915	0.239915
EST	K	PM2.5	0.071691	0.072639	0.0762	0.0762	0.0762	0.0762
EST	K	SO2	0	0	0	0	0	0
EST	L	CH4	0	0	0.301494	0.301494	0.301494	0.301494
EST	L	CO	0	0	2.69024	2.69024	2.69024	2.69024
EST	L	CO2	0	0	60.8896	60.8896	60.8896	60.8896
EST	L	NH3	4.09548	3.83693	4.6776	4.6776	4.6776	4.6776
EST	L	NMVOC	0.17401	0.17688	1.72452	1.72452	1.72452	1.72452
EST	L	NOx	2.4964	2.48587	0.26882	0.26882	0.26882	0.26882
EST	L	PM10	0.917058	0.923416	1.18827	1.18827	1.18827	1.18827
EST	L	PM2.5	0.035272	0.035516	0.273221	0.273221	0.273221	0.273221
EST	L	SO2	0	0	0.0114454	0.0114454	0.0114454	0.0114454
EU27 + UK	A	CH4	132.304	132.8	152.115	147.514	147.383	142.422
EU27 + UK	A	CO	372.071	357.636	404.778	391.839	392.162	375.24
EU27 + UK	A	CO2	817565	699665	1.07577e+06	1.03971e+06	1.04157e+06	998195	933.74	823.708
EU27 + UK	A	NH3	4.80651	5.15896	5.95248	5.7473	5.76952	5.40032
EU27 + UK	A	NMVOC	43.4814	41.5137	43.1543	41.7129	41.7549	39.5054
EU27 + UK	A	NOx	802.686	704.533	812.446	785.299	785.312	754.527
EU27 + UK	A	PM10	39.3398	35.789	41.0645	39.8517	39.9714	38.0152
EU27 + UK	A	PM2.5	29.4411	27.5082	29.4064	28.5161	28.5863	27.2103
EU27 + UK	A	SO2	561.422	451.872	590.636	573.263	574.949	548.04
EU27 + UK	B	CH4	180.002	168.162	171.184	162.856	135.181	130.924
EU27 + UK	B	CO	3852.15	3379.07	3891.78	3608.88	3080.16	2988.11
EU27 + UK	B	CO2	899477	839467	991557	926558	786021	762261	632.437	583.582
EU27 + UK	B	NH3	50.4401	50.4618	59.6679	57.5376	47.5931	46.1349
EU27 + UK	B	NMVOC	687.3	667.421	658.655	639.93	513.315	496.65
EU27 + UK	B	NOx	1056.88	999.447	1034.05	964.449	809.807	784.965
EU27 + UK	B	PM10	458.144	455.42	482.772	449.673	381.669	370.137
EU27 + UK	B	PM2.5	188.281	182.579	200.116	186.943	158.164	153.043
EU27 + UK	B	SO2	731.126	674.176	732.909	686.178	584.712	565.988
EU27 + UK	C	CH4	625.785	619.243	640.44	648.037	670.15	673.317
EU27 + UK	C	CO	7879.79	7666.72	7682.88	7816.09	8139.79	8190.35
EU27 + UK	C	CO2	589843	582202	722963	712448	723886	722454	612.09	599.892
EU27 + UK	C	NH3	64.4209	62.729	74.8892	76.1283	79.2152	79.7153
EU27 + UK	C	NMVOC	903.312	875.993	926.072	936.188	969.404	974.843
EU27 + UK	C	NOx	605.721	592.529	589.565	572.06	573.111	569.195
EU27 + UK	C	PM10	773.162	758.729	680.537	692.292	720.924	724.818
EU27 + UK	C	PM2.5	736.264	721.944	633.123	644.223	671.2	674.851
EU27 + UK	C	SO2	317.567	313.886	291.698	290.131	295.988	295.722
EU27 + UK	D	CH4	1996.53	1891.9	2130.5	1987.84	2130.5	2130.5
EU27 + UK	D	CO	279.72	255.261	74.9559	70.1078	74.9559	74.9559
EU27 + UK	D	CO2	21924.8	19175.4	22301.8	21340.3	22301.8	22301.8
EU27 + UK	D	NH3	2.3525	2.24822	3.94545	3.91714	3.94545	3.94545
EU27 + UK	D	NMVOC	457.552	399.371	453.154	407.255	453.154	453.154
EU27 + UK	D	NOx	25.2066	22.4182	26.7495	23.9005	26.7495	26.7495
EU27 + UK	D	PM10	28.5977	23.3604	24.5413	22.0388	24.5413	24.5413
EU27 + UK	D	PM2.5	8.48573	6.87395	5.43095	4.97089	5.43095	5.43095
EU27 + UK	D	SO2	99.4026	87.9296	108.642	98.6382	108.642	108.642
EU27 + UK	E	CH4	3.30368	2.89241	3.41692	3.41692	3.41692	3.41692
EU27 + UK	E	CO	42.7151	39.0735	58.8107	58.8101	58.8107	58.8107
EU27 + UK	E	CO2	9485.81	9346.23	10319	10319	10319	10319
EU27 + UK	E	NH3	5.1804	4.86218	29.7607	29.7606	29.7607	29.7607
EU27 + UK	E	NMVOC	2524.46	2577.5	2649.1	2614.43	2649.1	2649.1
EU27 + UK	E	NOx	2.07152	1.71996	4.64031	4.6393	4.64031	4.64031
EU27 + UK	E	PM10	25.7072	20.5475	31.001	31.001	31.001	31.001
EU27 + UK	E	PM2.5	21.107	17.1374	24.989	24.989	24.989	24.989
EU27 + UK	E	SO2	1.9815	1.58685	1.10541	1.10534	1.10541	1.10541
EU27 + UK	F	CH4	49.2245	42.373	41.9314	34.103	32.2313	30.1731
EU27 + UK	F	CO	3657.45	2955.54	2980.52	2449.02	2317.5	2172.14
EU27 + UK	F	CO2	894650	771635	940339	785545	710713	665169	879.866	830.156
EU27 + UK	F	NH3	49.9728	41.8382	41.5728	34.1535	31.8907	29.762
EU27 + UK	F	NMVOC	520.653	452.773	394.336	320.091	305.669	286.035
EU27 + UK	F	NOx	2698.22	2202.83	2511.72	2089.6	1912.45	1790.96
EU27 + UK	F	PM10	203.185	174.283	183.714	155.172	140.49	131.509
EU27 + UK	F	PM2.5	131.14	109.824	111.807	93.5309	85.5519	80.092
EU27 + UK	F	SO2	4.84162	4.21195	5.51536	4.54741	4.12312	3.83604
EU27 + UK	H	CH4	1.38031	0.587526	0.341047	0.149834	0.192998	0.159645
EU27 + UK	H	CO	120.461	62.1233	128.987	62.9956	79.4786	64.3711
EU27 + UK	H	CO2	185345	78573.9	17927.8	7896.14	10452.3	8449.61	200.765	83.9978
EU27 + UK	H	NH3	0.167118	0.0741164	0.168328	0.0741508	0.0854252	0.0918924
EU27 + UK	H	NMVOC	8.54846	3.80755	9.03851	4.07312	5.34447	4.27173
EU27 + UK	H	NOx	83.3825	35.4938	81.4583	36.0867	47.964	38.3516
EU27 + UK	H	PM10	2.93689	1.24064	3.08125	1.40899	2.00393	1.37138
EU27 + UK	H	PM2.5	2.80457	1.17429	2.94808	1.34535	1.92365	1.31492
EU27 + UK	H	SO2	6.03218	2.44687	5.93116	2.60662	3.41276	2.72651
EU27 + UK	I	CH4	0.877117	0.729745	6.98245	6.84936	6.98245	6.98245
EU27 + UK	I	CO	1518.6	1481.82	1536.58	1494.42	1536.58	1536.58
EU27 + UK	I	CO2	16254.7	14223.3	91129.9	89681.6	91129.9	91129.9
EU27 + UK	I	NH3	0.413434	0.399035	0.41012	0.405143	0.41012	0.41012
EU27 + UK	I	NMVOC	141.488	134.136	156.958	153.85	156.958	156.958
EU27 + UK	I	NOx	576.549	534.271	585.379	575.2	585.379	585.379
EU27 + UK	I	PM10	44.4472	41.0965	48.3537	47.5565	48.3537	48.3537
EU27 + UK	I	PM2.5	37.1148	34.0621	41.0895	40.3075	41.0895	41.0895
EU27 + UK	I	SO2	7.18238	5.94867	3.94346	3.93052	3.94346	3.94346
EU27 + UK	J	CH4	4770.5	4669.45	4983.83	4983.83	4983.83	4983.83
EU27 + UK	J	CO	841.466	830.031	144.466	144.466	144.466	144.466
EU27 + UK	J	CO2	3222.2	3178.56	3111.51	3111.51	3111.51	3111.51
EU27 + UK	J	NH3	52.0048	51.821	49.4822	49.4822	49.4822	49.4822
EU27 + UK	J	NMVOC	89.3843	80.2176	84.927	84.927	84.927	84.927
EU27 + UK	J	NOx	65.095	65.54	11.4013	11.4013	11.4013	11.4013
EU27 + UK	J	PM10	100.106	97.3271	38.8914	38.8914	38.8914	38.8914
EU27 + UK	J	PM2.5	91.2968	92.5601	36.9624	36.9624	36.9624	36.9624
EU27 + UK	J	SO2	4.72662	4.60149	2.56607	2.56607	2.56607	2.56607
EU27 + UK	K	CH4	9067.52	9055.59	9407.67	9407.67	9407.67	9407.67
EU27 + UK	K	CO	0	0	0	0	0	0
EU27 + UK	K	CO2	0	0	0	0	0	0
EU27 + UK	K	NH3	1577.31	1575.51	1632.32	1632.32	1632.32	1632.32
EU27 + UK	K	NMVOC	1260.68	1256.14	1160.81	1160.81	1160.81	1160.81
EU27 + UK	K	NOx	39.3617	39.2269	0	0	0	0
EU27 + UK	K	PM10	107.627	107.414	107.654	107.654	107.654	107.654
EU27 + UK	K	PM2.5	23.5908	23.4719	23.7677	23.7677	23.7677	23.7677
EU27 + UK	K	SO2	0	0	0	0	0	0
EU27 + UK	L	CH4	118.995	125.672	174.386	174.386	174.386	174.386
EU27 + UK	L	CO	131.152	126.13	94.2734	94.2734	94.2734	94.2734
EU27 + UK	L	CO2	0	0	12100.2	12100.2	12100.2	12100.2
EU27 + UK	L	NH3	1909.54	1880.06	1970.5	1970.5	1970.5	1970.5
EU27 + UK	L	NMVOC	490.647	492.055	465.742	465.742	465.742	465.742
EU27 + UK	L	NOx	654.053	663.022	3.83205	3.83205	3.83205	3.83205
EU27 + UK	L	PM10	194.206	191.335	204.29	204.29	204.29	204.29
EU27 + UK	L	PM2.5	19.6038	19.0937	17.2065	17.2065	17.2065	17.2065
EU27 + UK	L	SO2	0.749634	0.7207	0.403929	0.403929	0.403929	0.403929
FIN	A	CH4	1.18027	1.13802	1.24424	1.21041	1.19627	1.11367
FIN	A	CO	15.1964	15.0956	15.9098	15.4773	15.2965	14.2403
FIN	A	CO2	13963.4	11037.5	27916.6	27157.6	26840.4	24987.1	15.4895	11.952
FIN	A	NH3	0.0029566	0.00352225	0.00355626	0.00345958	0.00341916	0.00318308
FIN	A	NMVOC	1.41087	1.41115	1.65253	1.6076	1.58882	1.47912
FIN	A	NOx	21.101	16.17	21.4165	20.8342	20.5909	19.1691
FIN	A	PM10	1.02576	0.824201	0.982866	0.956144	0.944975	0.879728
FIN	A	PM2.5	0.277425	0.216662	0.280557	0.272929	0.269741	0.251116
FIN	A	SO2	10.0302	6.38853	9.56468	9.30463	9.19594	8.56099
FIN	B	CH4	0.933879	0.902911	0.863125	0.844665	0.709396	0.67267
FIN	B	CO	30.3212	30.3243	29.5543	28.9086	24.2904	23.0329
FIN	B	CO2	12538.4	11793	32694.5	31995.1	26871.4	25480.2	10.5335	10.2065
FIN	B	NH3	0.515747	0.580677	0.663045	0.652147	0.544952	0.516739
FIN	B	NMVOC	8.58926	8.09583	8.75095	8.60645	7.19234	6.81999
FIN	B	NOx	28.0801	26.6402	28.2232	27.6179	23.1965	21.9956
FIN	B	PM10	3.53117	3.40955	3.80649	3.73483	3.12853	2.96656
FIN	B	PM2.5	2.37652	2.33773	2.57405	2.52691	2.11559	2.00606
FIN	B	SO2	14.775	12.9586	14.0785	13.729	11.571	10.972
FIN	C	CH4	8.24809	6.91985	6.85445	6.96215	7.11334	7.17516
FIN	C	CO	170.12	148.372	144.165	146.541	149.712	151.061
FIN	C	CO2	4465.43	4141.15	8459.97	8467.41	8588.61	8603.44	3.85003	3.50666
FIN	C	NH3	1.14234	1.00696	1.00728	1.02476	1.04789	1.05779
FIN	C	NMVOC	22.1481	18.2235	19.1322	19.4586	19.8894	20.0741
FIN	C	NOx	11.566	10.4104	8.41145	8.39811	8.48874	8.49151
FIN	C	PM10	10.7072	8.89957	8.9419	9.06858	9.25235	9.32563
FIN	C	PM2.5	9.16454	7.70442	8.06809	8.19588	8.37405	8.44729
FIN	C	SO2	4.02257	3.69951	2.73084	2.65706	2.66235	2.63038
FIN	D	CH4	1.04691	0.867537	0.957648	0.957588	0.957648	0.957648
FIN	D	CO	0	0	0	0	0	0
FIN	D	CO2	65.1447	76.3397	90.7863	87.4922	90.7863	90.7863
FIN	D	NH3	0.00309403	0.00281858	0	0	0	0
FIN	D	NMVOC	5.78787	5.4452	5.40145	5.06734	5.40145	5.40145
FIN	D	NOx	0	0	0	0	0	0
FIN	D	PM10	0.98016	0.540845	1.69032	1.69011	1.69032	1.69032
FIN	D	PM2.5	0.683822	0.376085	1.18667	1.18653	1.18667	1.18667
FIN	D	SO2	0.543	0.045	0	0	0	0
FIN	E	CH4	0.00635	0.00512	0.00659	0.00659	0.00659	0.00659
FIN	E	CO	0.133797	0.116078	0.187057	0.187057	0.187057	0.187057
FIN	E	CO2	153.927	130.497	157.986	157.986	157.986	157.986
FIN	E	NH3	0.167936	0.127422	0.234065	0.233913	0.234065	0.234065
FIN	E	NMVOC	17.2667	22.9302	16.0393	15.9775	16.0393	16.0393
FIN	E	NOx	0.00440088	0.00380434	0.00614829	0.00614829	0.00614829	0.00614829
FIN	E	PM10	0.111484	0.110455	0.152477	0.152475	0.152477	0.152477
FIN	E	PM2.5	0.106152	0.105157	0.145834	0.145833	0.145834	0.145834
FIN	E	SO2	0.00397555	0.00183496	0.00499528	0.00499528	0.00499528	0.00499528
FIN	F	CH4	0.341632	0.317235	0.265275	0.240051	0.199009	0.184063
FIN	F	CO	33.0536	29.0719	19.7043	17.9708	14.7821	13.6719
FIN	F	CO2	10445.6	9845.3	11927.6	10793.5	8948.12	8276.07	10.3676	10.1791
FIN	F	NH3	0.766891	0.683673	0.65586	0.59507	0.492026	0.455072
FIN	F	NMVOC	4.50884	4.08198	1.95474	1.78222	1.46644	1.35631
FIN	F	NOx	27.6277	24.3848	24.8133	22.9782	18.6149	17.2169
FIN	F	PM10	7.44739	7.07287	7.26441	6.60404	5.44976	5.04046
FIN	F	PM2.5	1.81063	1.66644	1.67249	1.52905	1.2547	1.16047
FIN	F	SO2	0.0452509	0.0425122	0.0408461	0.0375965	0.0306427	0.0283413
FIN	H	CH4	0.0170475	0.00582233	0.00355471	0.00135178	0.00205456	0.00180941
FIN	H	CO	1.26932	0.497492	1.20493	0.45821	0.69643	0.613331
FIN	H	CO2	2779.84	955.143	240.68	91.5253	139.109	122.51	3.33156	1.22269
FIN	H	NH3	0	0	0	0	0	0
FIN	H	NMVOC	0.142713	0.0554144	0.140197	0.0533139	0.0810313	0.0713626
FIN	H	NOx	1.07007	0.369326	1.01783	0.387057	0.588284	0.51809
FIN	H	PM10	0.00766233	0.0026529	0.00744578	0.00283147	0.00430352	0.00379002
FIN	H	PM2.5	0.00766233	0.0026529	0.00744578	0.00283147	0.00430352	0.00379002
FIN	H	SO2	0.0662775	0.0225123	0.0641401	0.0243911	0.0370718	0.0326484
FIN	I	CH4	0.00394739	0.00359988	0.472413	0.47111	0.472413	0.472413
FIN	I	CO	71.1772	69.1097	74.2036	74.0926	74.2036	74.2036
FIN	I	CO2	69.4482	63.6013	2541.51	2524.92	2541.51	2541.51
FIN	I	NH3	0.00621749	0.00621402	0.00610339	0.00606137	0.00610339	0.00610339
FIN	I	NMVOC	5.66139	5.34635	6.09821	6.0796	6.09821	6.09821
FIN	I	NOx	13.9821	12.9531	13.7759	13.6852	13.7759	13.7759
FIN	I	PM10	0.805418	0.72719	0.884161	0.87911	0.884161	0.884161
FIN	I	PM2.5	0.800883	0.72295	0.882855	0.877805	0.882855	0.882855
FIN	I	SO2	0.00998476	0.00994127	0.0418757	0.0418131	0.0418757	0.0418757
FIN	J	CH4	66.7794	64.729	68.118	68.118	68.118	68.118
FIN	J	CO	0	0	0	0	0	0
FIN	J	CO2	0	0	0	0	0	0
FIN	J	NH3	0.700701	0.697266	0.475059	0.475059	0.475059	0.475059
FIN	J	NMVOC	0.106131	0.101867	0.106131	0.106131	0.106131	0.106131
FIN	J	NOx	0	0	0	0	0	0
FIN	J	PM10	0.105872	0.0961984	0.104363	0.104363	0.104363	0.104363
FIN	J	PM2.5	0.105441	0.0957873	0.103916	0.103916	0.103916	0.103916
FIN	J	SO2	0	0	0	0	0	0
FIN	K	CH4	100.941	100.963	101.183	101.183	101.183	101.183
FIN	K	CO	0	0	0	0	0	0
FIN	K	CO2	0	0	0	0	0	0
FIN	K	NH3	17.9594	17.0909	18.324	18.324	18.324	18.324
FIN	K	NMVOC	13.0611	12.3652	12.9786	12.9786	12.9786	12.9786
FIN	K	NOx	0.436682	0.417724	0	0	0	0
FIN	K	PM10	0.565301	0.544727	0.571407	0.571407	0.571407	0.571407
FIN	K	PM2.5	0.161272	0.149811	0.1665	0.1665	0.1665	0.1665
FIN	K	SO2	0	0	0	0	0	0
FIN	L	CH4	0.0809596	0.0688874	0.00836908	0.00836908	0.00836908	0.00836908
FIN	L	CO	2.34287	1.99039	0.0746775	0.0746775	0.0746775	0.0746775
FIN	L	CO2	0	0	212.755	212.755	212.755	212.755
FIN	L	NH3	10.9144	10.4612	9.6815	9.6815	9.6815	9.6815
FIN	L	NMVOC	3.55342	3.30188	2.85544	2.85544	2.85544	2.85544
FIN	L	NOx	9.5207	9.28598	0.00781453	0.00781453	0.00781453	0.00781453
FIN	L	PM10	3.99261	4.01395	3.66228	3.66228	3.66228	3.66228
FIN	L	PM2.5	0.393138	0.368522	0.206114	0.206114	0.206114	0.206114
FIN	L	SO2	0.0107067	0.00914923	0.000317708	0.000317708	0.000317708	0.000317708
FRA	A	CH4	1.81429	1.67354	1.61836	1.55718	1.54231	1.4708
FRA	A	CO	22.6259	20.5442	21.0632	20.267	20.0734	19.1427
FRA	A	CO2	32989.8	30320.3	44714.2	43024	42613.1	40637.3	29.4336	26.8424
FRA	A	NH3	1.09435	1.08397	1.12817	1.08553	1.07516	1.02531
FRA	A	NMVOC	0.794626	0.70536	0.657162	0.632322	0.626281	0.597244
FRA	A	NOx	25.1963	23.3016	14.8457	14.2845	14.1481	13.4921
FRA	A	PM10	1.73513	1.63514	0.530405	0.510356	0.505481	0.482045
FRA	A	PM2.5	1.51156	1.4344	0.439925	0.423297	0.419253	0.399815
FRA	A	SO2	4.96771	4.37446	6.24159	6.00566	5.94829	5.6725
FRA	B	CH4	7.29797	7.19255	7.64092	7.0176	5.80026	5.56921
FRA	B	CO	777.983	627	643.878	582.715	488.771	469.301
FRA	B	CO2	88654.3	79348.9	95457.9	87287.3	72462.5	69576.1	61.6667	54.7152
FRA	B	NH3	5.72863	6.48813	7.57724	7.06899	5.75192	5.5228
FRA	B	NMVOC	63.1356	59.3349	60.9991	57.5883	46.3047	44.4602
FRA	B	NOx	90.8732	87.6825	89.8879	82.2045	68.2343	65.5163
FRA	B	PM10	49.8813	42.5293	52.352	47.5554	39.7407	38.1577
FRA	B	PM2.5	20.2888	17.7505	22.6196	20.5167	17.1707	16.4867
FRA	B	SO2	63.34	59.4003	76.8114	69.9106	58.3079	55.9853
FRA	C	CH4	43.0793	39.7045	38.8938	39.2671	41.1966	41.4652
FRA	C	CO	930.933	847.261	867.24	883.291	933.066	941.107
FRA	C	CO2	73557.7	70490.4	90854.3	87911.5	89036	88645.7	79.4377	75.6121
FRA	C	NH3	19.6471	18.2305	18.6951	19.0307	20.0876	20.2574
FRA	C	NMVOC	109.303	99.8012	96.3323	98.0742	103.575	104.458
FRA	C	NOx	77.2259	72.5038	72.5284	68.2057	67.354	66.516
FRA	C	PM10	56.9138	51.5619	52.5373	53.3676	56.2502	56.6987
FRA	C	PM2.5	55.7393	50.4985	51.4057	52.226	55.0536	55.4945
FRA	C	SO2	15.7739	15.2925	19.1631	17.8644	17.5127	17.2508
FRA	D	CH4	40.1224	33.4278	38.8493	38.7194	38.8493	38.8493
FRA	D	CO	21.1177	30.2083	1.61206	1.42536	1.61206	1.61206
FRA	D	CO2	2587.86	2203.1	3007.83	2949.36	3007.83	3007.83
FRA	D	NH3	0.0115188	0.0085188	0	0	0	0
FRA	D	NMVOC	20.6758	16.2779	20.9856	18.1498	20.9856	20.9856
FRA	D	NOx	1.93628	1.8068	2.47817	2.19116	2.47817	2.47817
FRA	D	PM10	0.609842	0.451537	0.159002	0.142294	0.159002	0.159002
FRA	D	PM2.5	0.481968	0.348246	0.0842064	0.0747385	0.0842064	0.0842064
FRA	D	SO2	12.2785	9.40723	17.6489	15.6049	17.6489	17.6489
FRA	E	CH4	0.0117478	0.0096179	0.00798611	0.00798611	0.00798611	0.00798611
FRA	E	CO	3.25077	3.0602	3.32804	3.32804	3.32804	3.32804
FRA	E	CO2	1466.14	1533.5	1675.72	1675.72	1675.72	1675.72
FRA	E	NH3	0.207413	0.203245	0.217212	0.217212	0.217212	0.217212
FRA	E	NMVOC	295.174	293.954	298.537	292.784	298.537	298.537
FRA	E	NOx	0.956939	0.764016	0.947137	0.947137	0.947137	0.947137
FRA	E	PM10	0.877368	0.70462	0.932126	0.932126	0.932126	0.932126
FRA	E	PM2.5	0.677584	0.577892	0.719817	0.719817	0.719817	0.719817
FRA	E	SO2	0.0141495	0.00926263	0.0148707	0.0148707	0.0148707	0.0148707
FRA	F	CH4	5.71707	4.87203	3.58572	2.89644	2.53464	2.52821
FRA	F	CO	292.469	226.9	171.477	140.491	121.212	120.905
FRA	F	CO2	124092	104197	135196	113038	95566.4	95324	116.619	105.095
FRA	F	NH3	4.75764	3.94791	3.10386	2.52786	2.19403	2.18846
FRA	F	NMVOC	46.2362	37.9443	30.8079	24.9787	21.7772	21.722
FRA	F	NOx	416.141	321.211	379.869	313.018	268.518	267.837
FRA	F	PM10	26.2179	20.9594	23.3738	19.2483	16.5222	16.4803
FRA	F	PM2.5	19.5164	15.199	16.4412	13.4998	11.6218	11.5923
FRA	F	SO2	0.828009	0.69787	0.850727	0.711812	0.601354	0.599828
FRA	H	CH4	0.108692	0.0559786	0.0680393	0.0323527	0.0405173	0.0279686
FRA	H	CO	10.8331	5.82438	8.59365	4.08628	5.11751	3.53255
FRA	H	CO2	24390.2	11282.8	2138.46	1016.84	1273.45	879.048	21.9812	9.89994
FRA	H	NH3	0	0	0	0	0	0
FRA	H	NMVOC	0.908453	0.462576	1.23348	0.586518	0.734533	0.507039
FRA	H	NOx	10.1521	4.61354	10.2112	4.85541	6.08074	4.19746
FRA	H	PM10	0.204551	0.0892258	0.516279	0.245491	0.307444	0.212225
FRA	H	PM2.5	0.142875	0.0622393	0.39872	0.189592	0.237437	0.1639
FRA	H	SO2	0.746661	0.330348	0.7875	0.374457	0.468955	0.323714
FRA	I	CH4	0.123703	0.090031	0.761121	0.761121	0.761121	0.761121
FRA	I	CO	225.326	229.111	204.067	201.31	204.067	204.067
FRA	I	CO2	824.475	614.232	9444.89	9444.89	9444.89	9444.89
FRA	I	NH3	0.0317811	0.0326593	0.032747	0.0317437	0.032747	0.032747
FRA	I	NMVOC	18.8692	17.5219	17.4127	16.9805	17.4127	17.4127
FRA	I	NOx	70.5213	65.9684	70.2571	68.41	70.2571	70.2571
FRA	I	PM10	7.62997	7.28414	7.94552	7.78186	7.94552	7.94552
FRA	I	PM2.5	5.57355	5.21511	5.78895	5.63388	5.78895	5.78895
FRA	I	SO2	0.655912	0.679754	0.0917187	0.0890894	0.0917187	0.0917187
FRA	J	CH4	645.175	630.481	621.532	621.532	621.532	621.532
FRA	J	CO	19.5375	20.0229	13.2122	13.2122	13.2122	13.2122
FRA	J	CO2	1737.99	1602.93	1426.74	1426.74	1426.74	1426.74
FRA	J	NH3	8.49044	8.76144	6.56325	6.56325	6.56325	6.56325
FRA	J	NMVOC	8.97777	8.91924	9.33541	9.33541	9.33541	9.33541
FRA	J	NOx	2.44652	2.40493	2.20031	2.20031	2.20031	2.20031
FRA	J	PM10	12.2215	12.3155	10.7957	10.7957	10.7957	10.7957
FRA	J	PM2.5	12.0882	12.1804	10.6902	10.6902	10.6902	10.6902
FRA	J	SO2	0.365731	0.370132	0.375611	0.375611	0.375611	0.375611
FRA	K	CH4	1502.04	1483.97	1527.54	1527.54	1527.54	1527.54
FRA	K	CO	0	0	0	0	0	0
FRA	K	CO2	0	0	0	0	0	0
FRA	K	NH3	215.169	211.897	232.572	232.572	232.572	232.572
FRA	K	NMVOC	197.366	194.503	92.777	92.777	92.777	92.777
FRA	K	NOx	9.57633	9.43091	0	0	0	0
FRA	K	PM10	20.3156	20.3567	19.886	19.886	19.886	19.886
FRA	K	PM2.5	4.73509	4.74331	4.65662	4.65662	4.65662	4.65662
FRA	K	SO2	0	0	0	0	0	0
FRA	L	CH4	2.81899	2.65958	2.20561	2.20561	2.20561	2.20561
FRA	L	CO	40.4105	37.022	1.706	1.706	1.706	1.706
FRA	L	CO2	0	0	2047.29	2047.29	2047.29	2047.29
FRA	L	NH3	340.768	322.329	322.269	322.269	322.269	322.269
FRA	L	NMVOC	196.213	195.85	33.9987	33.9987	33.9987	33.9987
FRA	L	NOx	63.3763	60.2086	0.0588276	0.0588276	0.0588276	0.0588276
FRA	L	PM10	29.3985	28.1384	26.0086	26.0086	26.0086	26.0086
FRA	L	PM2.5	4.14106	3.83024	1.14518	1.14518	1.14518	1.14518
FRA	L	SO2	0.172443	0.153499	0.007258	0.007258	0.007258	0.007258
GBR	A	CH4	11.242	11.5789	10.0626	9.49382	9.23742	9.40471
GBR	A	CO	38.2151	43.2546	49.9654	47.1411	45.868	46.6987
GBR	A	CO2	59382.2	50886.3	87192.3	82263.8	80042.1	81491.7	76.3491	63.1231
GBR	A	NH3	0.151534	0.174382	0.103551	0.0976977	0.0950591	0.0967807
GBR	A	NMVOC	1.56297	1.41524	1.77283	1.67262	1.62745	1.65692
GBR	A	NOx	75.7099	73.4798	92.3125	87.0946	84.7423	86.2771
GBR	A	PM10	1.75549	1.6596	2.45402	2.31531	2.25277	2.29357
GBR	A	PM2.5	1.51574	1.47978	2.12006	2.00023	1.94621	1.98145
GBR	A	SO2	11.6902	12.0434	21.1956	19.9975	19.4574	19.8098
GBR	B	CH4	13.2945	12.6705	11.1073	10.0084	7.70508	7.54787
GBR	B	CO	362.006	364.662	353.08	314.271	244.93	239.933
GBR	B	CO2	90569.9	85571.5	93425	83209	64808.6	63486.3	61.2082	55.7207
GBR	B	NH3	3.61323	2.97085	5.48863	5.09023	3.80744	3.72976
GBR	B	NMVOC	139.507	140.799	135.379	134.835	93.9117	91.9955
GBR	B	NOx	192.577	191.68	181.754	161.286	126.082	123.51
GBR	B	PM10	70.5856	65.3039	71.9921	63.3668	49.9407	48.9217
GBR	B	PM2.5	30.2742	30.0138	28.0422	24.7127	19.4528	19.0559
GBR	B	SO2	73.0975	63.2088	73.6456	63.7634	51.0877	50.0453
GBR	C	CH4	24.5228	24.4636	42.2889	43.2641	45.6869	45.7989
GBR	C	CO	290.404	286.685	458.554	471.079	499.36	500.91
GBR	C	CO2	88180.1	87974.7	89382.5	88411.1	91171.8	90856.5	85.7634	84.079
GBR	C	NH3	0.884204	0.895833	2.63177	2.71611	2.88902	2.90015
GBR	C	NMVOC	25.4016	25.3527	50.2335	51.6184	54.6879	54.8616
GBR	C	NOx	59.5703	57.9571	57.3624	53.972	53.5014	52.7988
GBR	C	PM10	21.3929	21.1373	49.4382	50.9176	54.0572	54.2482
GBR	C	PM2.5	20.9292	20.6899	48.3147	49.7634	52.8339	53.0212
GBR	C	SO2	46.6892	44.3964	40.6255	41.6028	44.0009	44.1143
GBR	D	CH4	204.595	187.073	216.84	206.774	216.84	216.84
GBR	D	CO	17.1642	16.0819	10.0108	8.3751	10.0108	10.0108
GBR	D	CO2	4120.08	3245.49	4278.56	3612.69	4278.56	4278.56
GBR	D	NH3	0.180854	0.183591	0.00768148	0.00630986	0.00768148	0.00768148
GBR	D	NMVOC	124.349	106.014	142.566	126.7	142.566	142.566
GBR	D	NOx	2.16414	2.41108	1.95191	1.63312	1.95191	1.95191
GBR	D	PM10	1.84574	1.62847	1.09052	0.904087	1.09052	1.09052
GBR	D	PM2.5	1.68965	1.48871	0.466677	0.38462	0.466677	0.466677
GBR	D	SO2	6.5689	7.15676	0.551765	0.453417	0.551765	0.551765
GBR	E	CH4	0	0	0	0	0	0
GBR	E	CO	1.79102	1.89189	1.89345	1.89345	1.89345	1.89345
GBR	E	CO2	481.231	379.495	405.701	405.701	405.701	405.701
GBR	E	NH3	1.33949	1.3489	15.0349	15.0349	15.0349	15.0349
GBR	E	NMVOC	329.838	320.142	300.512	297.796	300.512	300.512
GBR	E	NOx	0.0587335	0.0619483	0.4408	0.4408	0.4408	0.4408
GBR	E	PM10	2.57627	2.26693	2.85663	2.85663	2.85663	2.85663
GBR	E	PM2.5	1.63914	1.51289	1.80889	1.80889	1.80889	1.80889
GBR	E	SO2	0.90234	0.704134	0.0308339	0.0308339	0.0308339	0.0308339
GBR	F	CH4	3.48569	2.74189	2.67339	2.08964	1.82752	1.61721
GBR	F	CO	202.825	136.787	60.3591	47.8238	41.2611	36.5129
GBR	F	CO2	109892	88944.4	116006	93459.8	79301.2	70175.5	113.804	104.288
GBR	F	NH3	4.89203	3.57135	3.15794	2.48967	2.15875	1.91032
GBR	F	NMVOC	25.6177	20.3427	5.46688	4.24245	3.73713	3.30707
GBR	F	NOx	252.946	190.726	246.993	190.219	168.843	149.413
GBR	F	PM10	20.4623	16.2357	18.316	15.0155	12.5207	11.0798
GBR	F	PM2.5	12.8688	10.0133	11.0656	9.01902	7.56434	6.69386
GBR	F	SO2	0.484521	0.362101	1.27968	1.00231	0.874779	0.774112
GBR	H	CH4	0.170461	0.063717	0.06057	0.025119	0.0307503	0.0237646
GBR	H	CO	16.6248	5.534	18.7211	7.76383	9.50437	7.34523
GBR	H	CO2	38167.7	15028.4	3258.45	1351.31	1654.25	1278.45	37.1857	15.288
GBR	H	NH3	0	0	0	0	0	0
GBR	H	NMVOC	1.8108	0.674591	1.62838	0.675304	0.826696	0.638893
GBR	H	NOx	12.4686	4.99933	12.322	5.11007	6.25567	4.83455
GBR	H	PM10	0.256888	0.102245	0.101472	0.0420814	0.0515154	0.0398125
GBR	H	PM2.5	0.179315	0.070952	0.101472	0.0420814	0.0515154	0.0398125
GBR	H	SO2	1.56436	0.624462	1.5506	0.64305	0.787212	0.608378
GBR	I	CH4	0.125528	0.0966443	1.38069	1.26482	1.38069	1.38069
GBR	I	CO	354.523	326.143	353.784	325.375	353.784	353.784
GBR	I	CO2	4158.92	3399.74	14828.3	14103.4	14828.3	14828.3
GBR	I	NH3	0.0375586	0.0330975	0.0365642	0.0348379	0.0365642	0.0365642
GBR	I	NMVOC	22.6185	19.5988	23.0986	21.2369	23.0986	23.0986
GBR	I	NOx	85.5699	69.6731	80.178	76.6174	80.178	80.178
GBR	I	PM10	5.50713	4.53986	5.72157	5.35561	5.72157	5.72157
GBR	I	PM2.5	5.43796	4.48683	5.6643	5.29833	5.6643	5.6643
GBR	I	SO2	3.29724	1.92438	1.84603	1.84266	1.84603	1.84603
GBR	J	CH4	684.747	633.9	770.326	770.326	770.326	770.326
GBR	J	CO	28.4633	25.6331	19.7067	19.7067	19.7067	19.7067
GBR	J	CO2	243.135	248.945	239.057	239.057	239.057	239.057
GBR	J	NH3	6.88082	6.82313	8.20259	8.20259	8.20259	8.20259
GBR	J	NMVOC	9.09057	8.8367	6.58269	6.58269	6.58269	6.58269
GBR	J	NOx	1.73701	1.99337	1.44146	1.44146	1.44146	1.44146
GBR	J	PM10	6.55975	6.01336	3.89944	3.89944	3.89944	3.89944
GBR	J	PM2.5	6.04155	5.53837	3.56655	3.56655	3.56655	3.56655
GBR	J	SO2	0.542457	0.509275	0.592314	0.592314	0.592314	0.592314
GBR	K	CH4	1003.22	989.984	1015	1015	1015	1015
GBR	K	CO	0	0	0	0	0	0
GBR	K	CO2	0	0	0	0	0	0
GBR	K	NH3	95.6321	94.5894	103.418	103.418	103.418	103.418
GBR	K	NMVOC	75.551	74.8301	66.6566	66.6566	66.6566	66.6566
GBR	K	NOx	1.64846	1.62503	0	0	0	0
GBR	K	PM10	9.23472	8.93592	9.2065	9.2065	9.2065	9.2065
GBR	K	PM2.5	2.08942	2.03907	2.07636	2.07636	2.07636	2.07636
GBR	K	SO2	0	0	0	0	0	0
GBR	L	CH4	0	0	7.91203	7.91203	7.91203	7.91203
GBR	L	CO	0	0	0.175	0.175	0.175	0.175
GBR	L	CO2	0	0	1273.38	1273.38	1273.38	1273.38
GBR	L	NH3	138.95	131.314	142.694	142.694	142.694	142.694
GBR	L	NMVOC	55.6781	55.4785	35.6879	35.6879	35.6879	35.6879
GBR	L	NOx	26.9639	25.4586	0.00603448	0.00603448	0.00603448	0.00603448
GBR	L	PM10	6.82481	6.49339	7.93439	7.93439	7.93439	7.93439
GBR	L	PM2.5	0.732658	0.686713	0.779197	0.779197	0.779197	0.779197
GBR	L	SO2	0	0	0.00074452	0.00074452	0.00074452	0.00074452
GRC	A	CH4	0.413177	0.335899	0.409316	0.391181	0.39177	0.376788
GRC	A	CO	13.3371	6.65035	12.5614	12.0049	12.023	11.5632
GRC	A	CO2	27242.8	19946.3	29304.1	28005.8	28047.9	26975.3	23.367	20.6769
GRC	A	NH3	0	0	0	0	0	0
GRC	A	NMVOC	1.41273	1.23918	1.42136	1.35838	1.36043	1.3084
GRC	A	NOx	69.918	56.4928	67.1671	64.1913	64.2878	61.8294
GRC	A	PM10	2.22957	1.41122	1.88746	1.80383	1.80654	1.73746
GRC	A	PM2.5	1.44109	1.04811	1.03685	0.990911	0.992401	0.954451
GRC	A	SO2	35.2034	24.9435	16.7042	15.9641	15.9881	15.3767
GRC	B	CH4	0.475618	0.50166	0.443943	0.439006	0.366661	0.351945
GRC	B	CO	40.6201	42.2808	42.7246	42.5091	35.2871	33.8708
GRC	B	CO2	15144.6	13939.4	17061.6	16889.9	14091.5	13525.9	14.7814	14.579
GRC	B	NH3	2.19365	2.21971	2.21392	2.17756	1.82852	1.75513
GRC	B	NMVOC	9.04958	8.52342	9.86749	9.72472	8.14976	7.82265
GRC	B	NOx	23.805	21.1154	24.8214	24.5733	20.5005	19.6777
GRC	B	PM10	18.2973	19.4637	16.2051	16.1245	13.3841	12.8469
GRC	B	PM2.5	4.09794	4.17504	3.79809	3.76853	3.13692	3.01102
GRC	B	SO2	18.2763	16.6829	17.892	17.6794	14.7774	14.1843
GRC	C	CH4	8.53236	8.03049	9.4617	9.65731	10.0206	10.1173
GRC	C	CO	103.33	96.4333	112.488	114.873	119.329	120.513
GRC	C	CO2	5645.59	6284.91	7667.83	7732.04	7929.46	7975.51	7.08655	7.17955
GRC	C	NH3	1.5509	1.4408	1.75923	1.79651	1.86548	1.88385
GRC	C	NMVOC	13.0601	12.0871	14.7408	15.0192	15.5616	15.7039
GRC	C	NOx	7.91337	7.71034	6.98848	6.89069	6.89964	6.88621
GRC	C	PM10	16.4231	15.2683	18.6882	19.0851	19.8248	20.0214
GRC	C	PM2.5	16.0196	14.8944	18.2294	18.6169	19.3387	19.5306
GRC	C	SO2	3.0814	3.24942	0.989332	0.995707	1.01831	1.02343
GRC	D	CH4	28.8204	17.4601	30.4681	19.1431	30.4681	30.4681
GRC	D	CO	2.07242	2.00171	2.18944	2.16155	2.18944	2.18944
GRC	D	CO2	9.04229	5.17126	10.9706	10.8372	10.9706	10.9706
GRC	D	NH3	0.0253295	0.0244653	0.0267599	0.0264189	0.0267599	0.0267599
GRC	D	NMVOC	8.4084	4.99089	8.03424	5.0348	8.03424	8.03424
GRC	D	NOx	0	0	0	0	0	0
GRC	D	PM10	1.14977	0.590251	1.23679	0.691342	1.23679	1.23679
GRC	D	PM2.5	0.172465	0.0885377	0.185518	0.103701	0.185518	0.185518
GRC	D	SO2	0	0	0	0	0	0
GRC	E	CH4	0	0	0	0	0	0
GRC	E	CO	1.5268	0.934765	1.04651	1.04651	1.04651	1.04651
GRC	E	CO2	157.869	148.162	112.263	112.263	112.263	112.263
GRC	E	NH3	0.114808	0.0702845	0.0786709	0.0786709	0.0786709	0.0786709
GRC	E	NMVOC	51.1104	49.7996	47.2358	47.081	47.2358	47.2358
GRC	E	NOx	0.0498865	0.0305427	0.0341946	0.0341946	0.0341946	0.0341946
GRC	E	PM10	1.44313	1.13889	1.28446	1.28446	1.28446	1.28446
GRC	E	PM2.5	1.21106	0.911678	1.02692	1.02692	1.02692	1.02692
GRC	E	SO2	0.00104643	0.000671802	0.000839862	0.000839862	0.000839862	0.000839862
GRC	F	CH4	2.62611	2.24483	2.31988	1.99356	1.76834	1.76248
GRC	F	CO	185.95	155.169	144.696	121.868	110.295	109.93
GRC	F	CO2	15031.3	13192.6	13625.6	11844	10386.2	10351.8	16.0966	13.9913
GRC	F	NH3	1.38121	1.14533	1.30158	1.08858	0.992139	0.988851
GRC	F	NMVOC	40.6051	33.129	34.8183	29.3459	26.5404	26.4525
GRC	F	NOx	74.2324	66.0574	59.1397	53.9267	45.0795	44.9301
GRC	F	PM10	3.97187	3.5478	3.2426	2.9116	2.47169	2.4635
GRC	F	PM2.5	2.99219	2.67326	2.36864	2.14445	1.80551	1.79953
GRC	F	SO2	0.0912949	0.08075	0.0125721	0.010605	0.00958312	0.00955136
GRC	H	CH4	0.0307976	0.0107607	0.00295004	0.0014983	0.00202889	0.00129528
GRC	H	CO	1.36198	0.542746	1.32386	0.672382	0.910488	0.581271
GRC	H	CO2	4398.87	1536.99	541.266	274.906	372.256	237.654	6.37379	2.42804
GRC	H	NH3	0	0	0	0	0	0
GRC	H	NMVOC	0.148135	0.0654294	0.147106	0.074714	0.101172	0.0645898
GRC	H	NOx	2.40258	0.895342	2.38039	1.20899	1.63712	1.04516
GRC	H	PM10	0.0210594	0.00847537	0.0212653	0.0108005	0.0146252	0.00933697
GRC	H	PM2.5	0.0210594	0.00847537	0.0212653	0.0108005	0.0146252	0.00933697
GRC	H	SO2	0.146371	0.0560602	0.14452	0.0734006	0.0993934	0.0634544
GRC	I	CH4	0.00278803	0.00336314	0.0493211	0.0493211	0.0493211	0.0493211
GRC	I	CO	12.7787	22.0266	11.4353	11.3881	11.4353	11.4353
GRC	I	CO2	166.689	318.707	581.566	581.566	581.566	581.566
GRC	I	NH3	0.00154727	0.00195662	0.00243713	0.00239831	0.00243713	0.00243713
GRC	I	NMVOC	1.85143	2.60775	1.83859	1.82076	1.83859	1.83859
GRC	I	NOx	6.84464	9.45609	10.4446	10.2933	10.4446	10.4446
GRC	I	PM10	0.33651	0.443988	0.523819	0.514996	0.523819	0.523819
GRC	I	PM2.5	0.335468	0.44326	0.519934	0.511111	0.519934	0.519934
GRC	I	SO2	0.0336177	0.226647	0.0941272	0.0940445	0.0941272	0.0941272
GRC	J	CH4	182.075	182.873	177.368	177.368	177.368	177.368
GRC	J	CO	75.5271	75.8998	9.72696e-05	9.72696e-05	9.72696e-05	9.72696e-05
GRC	J	CO2	3.36032	3.02731	3.56992	3.56992	3.56992	3.56992
GRC	J	NH3	0.217411	0.286816	0.0555298	0.0555298	0.0555298	0.0555298
GRC	J	NMVOC	2.54613	2.65378	6.97508	6.97508	6.97508	6.97508
GRC	J	NOx	6.00196	6.03117	0.00971757	0.00971757	0.00971757	0.00971757
GRC	J	PM10	5.93038	5.96079	0.0813497	0.0813497	0.0813497	0.0813497
GRC	J	PM2.5	5.59252	5.62143	0.0758535	0.0758535	0.0758535	0.0758535
GRC	J	SO2	0.229052	0.230158	0.000934859	0.000934859	0.000934859	0.000934859
GRC	K	CH4	170.089	169.486	169.021	169.021	169.021	169.021
GRC	K	CO	0	0	0	0	0	0
GRC	K	CO2	0	0	0	0	0	0
GRC	K	NH3	21.4164	21.6027	21.5875	21.5875	21.5875	21.5875
GRC	K	NMVOC	12.8623	13.0441	12.5638	12.5638	12.5638	12.5638
GRC	K	NOx	0.303367	0.307489	0	0	0	0
GRC	K	PM10	2.11404	2.16336	2.0182	2.0182	2.0182	2.0182
GRC	K	PM2.5	0.483822	0.486805	0.47516	0.47516	0.47516	0.47516
GRC	K	SO2	0	0	0	0	0	0
GRC	L	CH4	6.46979	6.34688	7.56356	7.56356	7.56356	7.56356
GRC	L	CO	20.04	19.7818	6.041	6.041	6.041	6.041
GRC	L	CO2	0	0	120.91	120.91	120.91	120.91
GRC	L	NH3	36.152	36.8313	33.4504	33.4504	33.4504	33.4504
GRC	L	NMVOC	2.74914	2.74427	8.55097	8.55097	8.55097	8.55097
GRC	L	NOx	17.9669	18.4938	0.20831	0.20831	0.20831	0.20831
GRC	L	PM10	6.42688	6.39949	5.36754	5.36754	5.36754	5.36754
GRC	L	PM2.5	1.9383	1.91601	0.707059	0.707059	0.707059	0.707059
GRC	L	SO2	0.150225	0.14829	0.0257008	0.0257008	0.0257008	0.0257008
HRV	A	CH4	0.367775	0.40372	0.301209	0.288407	0.292067	0.27711
HRV	A	CO	1.13747	1.1489	0.893737	0.85575	0.86661	0.822232
HRV	A	CO2	2645.1	2621.72	2961.78	2835.89	2871.88	2724.81	2.98488	3.54456
HRV	A	NH3	0.00843913	0.00810939	0.00749202	0.00717358	0.00726462	0.0068926
HRV	A	NMVOC	0.314511	0.331388	0.281609	0.269639	0.273061	0.259078
HRV	A	NOx	2.55296	2.80275	1.51589	1.45146	1.46988	1.39461
HRV	A	PM10	1.45091	1.49998	1.19879	1.14784	1.16241	1.10288
HRV	A	PM2.5	1.22737	1.28162	1.02713	0.983469	0.995951	0.944949
HRV	A	SO2	0.256098	0.515264	0.510622	0.488919	0.495124	0.469769
HRV	B	CH4	0.186364	0.200178	0.124747	0.121366	0.102078	0.0997602
HRV	B	CO	9.53632	9.20326	5.45653	5.32433	4.46497	4.36358
HRV	B	CO2	5673.96	5406.09	5458.02	5328.15	4466.19	4364.77	5.12468	4.96057
HRV	B	NH3	1.6167	2.38464	2.80149	2.77391	2.29241	2.24035
HRV	B	NMVOC	5.46455	4.7056	4.42524	4.37271	3.62108	3.53886
HRV	B	NOx	6.96819	6.75683	5.63614	5.50899	4.61194	4.50721
HRV	B	PM10	4.72513	21.5966	5.22939	5.09546	4.2791	4.18193
HRV	B	PM2.5	1.44694	3.05375	1.50424	1.47115	1.23089	1.20294
HRV	B	SO2	4.01939	2.85883	3.38937	3.30898	2.77345	2.71047
HRV	C	CH4	13.0711	13.2548	12.8069	13.0146	13.3568	13.4399
HRV	C	CO	153.632	154.915	156.534	159.296	163.612	164.695
HRV	C	CO2	2658.92	2727.25	6699.88	6734.94	6869.04	6890.39	3.07717	3.11543
HRV	C	NH3	2.43517	2.44229	2.45298	2.4952	2.56221	2.57888
HRV	C	NMVOC	18.7731	18.8394	18.7731	19.0658	19.5599	19.6783
HRV	C	NOx	5.40917	5.49249	5.42985	5.38898	5.45341	5.44965
HRV	C	PM10	22.2081	22.1931	21.9147	22.3007	22.9045	23.0561
HRV	C	PM2.5	21.6547	21.6401	21.3682	21.745	22.3341	22.482
HRV	C	SO2	0.793963	0.797508	0.47643	0.476314	0.484054	0.484767
HRV	D	CH4	6.65426	6.14437	6.18257	6.18254	6.18257	6.18257
HRV	D	CO	15.4735	16.465	22.3689	21.8698	22.3689	22.3689
HRV	D	CO2	286.938	288.184	266.573	266.573	266.573	266.573
HRV	D	NH3	0.0627307	0.067029	0.0907869	0.0887612	0.0907869	0.0907869
HRV	D	NMVOC	3.03258	2.70773	3.51556	3.16153	3.51556	3.51556
HRV	D	NOx	0.112379	0.107033	0.158523	0.154986	0.158523	0.158523
HRV	D	PM10	0.35174	0.256497	0.388199	0.379537	0.388199	0.388199
HRV	D	PM2.5	0.171115	0.126629	0.187833	0.183642	0.187833	0.187833
HRV	D	SO2	2.44476	1.93175	4.39198	4.29398	4.39198	4.39198
HRV	E	CH4	0	0	0	0	0	0
HRV	E	CO	0.663822	0.617574	0.675171	0.675152	0.675171	0.675171
HRV	E	CO2	93.0548	87.1565	82.9139	82.9139	82.9139	82.9139
HRV	E	NH3	0.0490669	0.0452535	0.049975	0.0499735	0.049975	0.049975
HRV	E	NMVOC	30.5576	28.4858	26.493	26.2938	26.493	26.493
HRV	E	NOx	0.0217313	0.0202367	0.0220995	0.0220876	0.0220995	0.0220995
HRV	E	PM10	0.53306	0.571836	0.548143	0.548142	0.548143	0.548143
HRV	E	PM2.5	0.436428	0.445014	0.449905	0.449905	0.449905	0.449905
HRV	E	SO2	0.00521856	0.00706982	0.00491958	0.00491851	0.00491958	0.00491958
HRV	F	CH4	0.377056	0.355385	0.820267	0.69417	0.63699	0.635692
HRV	F	CO	24.673	22.8002	16.9156	14.4404	13.1361	13.1093
HRV	F	CO2	6284.05	5546.03	6282.64	5432.01	4878.88	4868.93	5.76392	5.43827
HRV	F	NH3	0.386933	0.363932	0.389336	0.32839	0.302345	0.301728
HRV	F	NMVOC	4.68974	4.66842	3.45161	2.93404	2.6804	2.67494
HRV	F	NOx	22.3293	20.5278	21.0112	18.654	16.3165	16.2833
HRV	F	PM10	1.7264	1.63007	1.61561	1.4129	1.25462	1.25207
HRV	F	PM2.5	1.27762	1.19827	1.1942	1.04104	0.927375	0.925486
HRV	F	SO2	0.00131331	0.00126689	0.0311872	0.0269977	0.0242189	0.0241695
HRV	H	CH4	0.00440275	0.00124639	0.000222126	0.0001101	0.000152767	9.24615e-05
HRV	H	CO	1.04026	0.610031	1.01921	0.505183	0.70096	0.424252
HRV	H	CO2	637.912	180.467	93.9003	46.5429	64.5799	39.0866	1.10708	0.37042
HRV	H	NH3	0.000156957	0.000125565	0.000156957	7.77976e-05	0.000107947	6.53343e-05
HRV	H	NMVOC	0.0281599	0.0131112	0.0272676	0.0135155	0.0187533	0.0113503
HRV	H	NOx	0.311681	0.0930646	0.296873	0.147149	0.204174	0.123575
HRV	H	PM10	0.00274755	0.000880112	0.00262267	0.00129996	0.00180374	0.0010917
HRV	H	PM2.5	0.00269241	0.000836004	0.00256753	0.00127263	0.00176582	0.00106875
HRV	H	SO2	0.0414173	0.00186349	0.0141662	0.00702163	0.00974278	0.00589676
HRV	I	CH4	0.0020277	0.0018859	0.0511776	0.0507449	0.0511776	0.0511776
HRV	I	CO	9.89541	8.90657	10.4603	10.3533	10.4603	10.4603
HRV	I	CO2	45.2568	42.092	972.689	962.024	972.689	972.689
HRV	I	NH3	0.00234279	0.00235447	0.00228348	0.00225737	0.00228348	0.00228348
HRV	I	NMVOC	0.747682	0.621494	0.851019	0.842491	0.851019	0.851019
HRV	I	NOx	4.27374	3.9467	4.56277	4.51689	4.56277	4.56277
HRV	I	PM10	0.173575	0.149073	0.194347	0.191941	0.194347	0.194347
HRV	I	PM2.5	0.172574	0.148141	0.193317	0.190911	0.193317	0.193317
HRV	I	SO2	0.00463137	0.0046079	0.00431468	0.00426538	0.00431468	0.00431468
HRV	J	CH4	67.3119	67.2791	77.846	77.846	77.846	77.846
HRV	J	CO	2.20807	2.20606	0.0009016	0.0009016	0.0009016	0.0009016
HRV	J	CO2	0	0	0	0	0	0
HRV	J	NH3	0.160882	0.16827	0.605171	0.605171	0.605171	0.605171
HRV	J	NMVOC	0.816437	0.81524	1.12553	1.12553	1.12553	1.12553
HRV	J	NOx	0.169368	0.16866	0.005313	0.005313	0.005313	0.005313
HRV	J	PM10	0.331192	0.318421	0.138045	0.138045	0.138045	0.138045
HRV	J	PM2.5	0.320424	0.307651	0.137747	0.137747	0.137747	0.137747
HRV	J	SO2	0.00689139	0.00686696	0.00072772	0.00072772	0.00072772	0.00072772
HRV	K	CH4	55.2354	53.6617	55.3812	55.3812	55.3812	55.3812
HRV	K	CO	0	0	0	0	0	0
HRV	K	CO2	0	0	0	0	0	0
HRV	K	NH3	9.10624	8.51436	10.218	10.218	10.218	10.218
HRV	K	NMVOC	7.613	7.3377	7.3054	7.3054	7.3054	7.3054
HRV	K	NOx	0.0762519	0.0745021	0	0	0	0
HRV	K	PM10	0.804766	0.787364	1.83499	1.83499	1.83499	1.83499
HRV	K	PM2.5	0.160531	0.155072	0.357629	0.357629	0.357629	0.357629
HRV	K	SO2	0	0	0	0	0	0
HRV	L	CH4	0	0	0.00874143	0.00874143	0.00874143	0.00874143
HRV	L	CO	0.0232954	0.0113698	0.078	0.078	0.078	0.078
HRV	L	CO2	0	0	78.0648	78.0648	78.0648	78.0648
HRV	L	NH3	16.7555	17.5583	18.835	18.835	18.835	18.835
HRV	L	NMVOC	1.68978	1.68695	3.40307	3.40307	3.40307	3.40307
HRV	L	NOx	3.68784	3.69162	0.00268966	0.00268966	0.00268966	0.00268966
HRV	L	PM10	2.34892	2.35065	2.4035	2.4035	2.4035	2.4035
HRV	L	PM2.5	0.0921527	0.0912928	0.0983778	0.0983778	0.0983778	0.0983778
HRV	L	SO2	0.000174628	8.52307e-05	0.000331843	0.000331843	0.000331843	0.000331843
HUN	A	CH4	0.942722	0.921026	0.932177	0.916095	0.929998	0.883792
HUN	A	CO	7.06222	7.99105	5.83369	5.73305	5.82005	5.53089
HUN	A	CO2	10545.5	10356.5	12460.4	12245.5	12431.3	11813.7	10.9048	11.0294
HUN	A	NH3	0.0214526	0.0212374	0.00106111	0.0010428	0.00105863	0.00100603
HUN	A	NMVOC	1.14226	1.17704	0.934978	0.918848	0.932792	0.886447
HUN	A	NOx	9.42888	9.26137	8.31146	8.16808	8.29204	7.88005
HUN	A	PM10	0.322205	0.345694	0.349063	0.343041	0.348248	0.330945
HUN	A	PM2.5	0.190374	0.202722	0.193325	0.18999	0.192873	0.18329
HUN	A	SO2	6.41122	7.35887	9.17033	9.01212	9.14889	8.69434
HUN	B	CH4	2.52297	2.64855	2.66253	2.56325	2.20164	2.13718
HUN	B	CO	21.7596	22.1355	27.9038	25.5743	23.0736	22.3981
HUN	B	CO2	12246.7	11980.1	13823.6	12901.1	11430.7	11096.1	8.95881	8.42917
HUN	B	NH3	0.401952	0.337183	0.2669	0.257769	0.220699	0.214238
HUN	B	NMVOC	13.3544	13.1949	14.2493	13.7512	11.7828	11.4378
HUN	B	NOx	12.689	12.413	11.1344	10.3857	9.20699	8.93742
HUN	B	PM10	14.1014	12.898	13.3773	12.2366	11.0617	10.7378
HUN	B	PM2.5	3.03095	2.76196	3.06627	2.82472	2.53549	2.46126
HUN	B	SO2	3.77661	3.20148	3.47553	3.23723	2.87391	2.78977
HUN	C	CH4	18.3104	18.1461	21.3653	21.7131	22.3817	22.5312
HUN	C	CO	227.419	224.101	263.001	267.964	276.396	278.634
HUN	C	CO2	11509.5	12093.6	17462	17448.1	17927.9	17874.1	11.9695	12.2527
HUN	C	NH3	3.60218	3.57876	4.37267	4.45429	4.59389	4.63061
HUN	C	NMVOC	26.2491	25.8185	31.447	31.8097	32.7638	32.8955
HUN	C	NOx	14.9251	15.4548	15.3552	15.166	15.5469	15.3953
HUN	C	PM10	30.2739	29.8976	37.2196	37.9334	39.1281	39.4517
HUN	C	PM2.5	29.5333	29.1706	36.2971	36.9934	38.1585	38.4743
HUN	C	SO2	6.14153	4.88531	7.42629	7.52884	7.75944	7.80037
HUN	D	CH4	67.1473	66.2833	25.0719	24.6936	25.0719	25.0719
HUN	D	CO	0.588848	0.594596	0.152541	0.139126	0.152541	0.152541
HUN	D	CO2	140.431	133.412	139.749	127.569	139.749	139.749
HUN	D	NH3	0.0485859	0.0440601	0.0329429	0.032262	0.0329429	0.0329429
HUN	D	NMVOC	1.10508	1.04069	2.26533	2.06336	2.26533	2.26533
HUN	D	NOx	0.11582	0.122507	0.147946	0.134935	0.147946	0.147946
HUN	D	PM10	0.425776	0.38767	0.334052	0.314898	0.334052	0.334052
HUN	D	PM2.5	0.094267	0.0892813	0.0473289	0.0443837	0.0473289	0.0473289
HUN	D	SO2	0.965981	0.804688	0.73457	0.669973	0.73457	0.73457
HUN	E	CH4	0	0	0	0	0	0
HUN	E	CO	0.500479	0.576212	0.575281	0.575281	0.575281	0.575281
HUN	E	CO2	104.32	120.522	104.745	104.745	104.745	104.745
HUN	E	NH3	0.0371036	0.0433827	0.0428441	0.0428441	0.0428441	0.0428441
HUN	E	NMVOC	30.2817	28.004	30.9615	30.5282	30.9615	30.9615
HUN	E	NOx	0.0163786	0.0188244	0.018817	0.018817	0.018817	0.018817
HUN	E	PM10	0.351099	0.285247	0.368673	0.368673	0.368673	0.368673
HUN	E	PM2.5	0.298422	0.283807	0.325491	0.325491	0.325491	0.325491
HUN	E	SO2	0.00331564	9.06e-05	0.002718	0.002718	0.002718	0.002718
HUN	F	CH4	0.946181	0.801809	0.767394	0.671753	0.702759	0.612965
HUN	F	CO	79.3674	66.0185	39.5007	34.493	36.1737	31.5516
HUN	F	CO2	14203.5	12181.4	13948.3	12385.8	12773.5	11141.4	13.7761	13.5445
HUN	F	NH3	1.16123	0.981942	1.05221	0.911601	0.963589	0.840468
HUN	F	NMVOC	12.913	11.0394	8.0057	6.94599	7.33141	6.39465
HUN	F	NOx	41.1967	33.8784	39.5165	35.4197	36.1882	31.5643
HUN	F	PM10	3.15642	2.71193	3.10414	2.75374	2.84269	2.47947
HUN	F	PM2.5	2.26938	1.93102	2.21535	1.96171	2.02876	1.76954
HUN	F	SO2	0.0569506	0.0487135	0.054447	0.04873	0.0498611	0.0434902
HUN	H	CH4	0.00589709	0.00215521	3.13e-05	1.24162e-05	1.98139e-05	1.36275e-05
HUN	H	CO	0.350346	0.1326	0.315727	0.125244	0.199865	0.137462
HUN	H	CO2	858.263	312.921	135.428	53.7221	85.7301	58.9629	1.57038	0.580372
HUN	H	NH3	0	0	0	0	0	0
HUN	H	NMVOC	0.0405586	0.0161957	0.0411318	0.0163163	0.0260378	0.0179081
HUN	H	NOx	0.632923	0.238662	0.600185	0.238084	0.379936	0.26131
HUN	H	PM10	0.00530007	0.00211227	0.00519368	0.00206025	0.00328776	0.00226124
HUN	H	PM2.5	0.00530007	0.00211227	0.00519368	0.00206025	0.00328776	0.00226124
HUN	H	SO2	0.0375123	0.0138373	0.0350213	0.0138924	0.0221696	0.0152476
HUN	I	CH4	0.00999941	0.00831578	0.086247	0.085597	0.086247	0.086247
HUN	I	CO	9.16045	9.15519	9.3174	9.17223	9.3174	9.3174
HUN	I	CO2	317.924	261.189	2264.56	2198.1	2264.56	2264.56
HUN	I	NH3	0.00512222	0.005287	0.00527889	0.00511132	0.00527889	0.00527889
HUN	I	NMVOC	1.82133	1.73494	1.92919	1.9026	1.92919	1.92919
HUN	I	NOx	11.7761	11.0083	12.9397	12.6491	12.9397	12.9397
HUN	I	PM10	0.446034	0.393164	0.51285	0.498246	0.51285	0.51285
HUN	I	PM2.5	0.441125	0.386361	0.509125	0.494521	0.509125	0.509125
HUN	I	SO2	0.0231429	0.0248148	0.0229992	0.0225803	0.0229992	0.0229992
HUN	J	CH4	130.591	129.799	131.264	131.264	131.264	131.264
HUN	J	CO	11.0861	8.4204	3.09229	3.09229	3.09229	3.09229
HUN	J	CO2	30.6974	25.3101	45.6254	45.6254	45.6254	45.6254
HUN	J	NH3	1.0144	1.03751	0.725498	0.725498	0.725498	0.725498
HUN	J	NMVOC	1.9458	1.85702	1.88291	1.88291	1.88291	1.88291
HUN	J	NOx	0.706892	0.526143	0.147099	0.147099	0.147099	0.147099
HUN	J	PM10	1.78092	1.62575	1.09213	1.09213	1.09213	1.09213
HUN	J	PM2.5	1.71516	1.57357	1.06758	1.06758	1.06758	1.06758
HUN	J	SO2	0.0317797	0.0257363	0.00834357	0.00834357	0.00834357	0.00834357
HUN	K	CH4	108.152	109.364	108.184	108.184	108.184	108.184
HUN	K	CO	0	0	0	0	0	0
HUN	K	CO2	0	0	0	0	0	0
HUN	K	NH3	34.5777	33.6543	35.6529	35.6529	35.6529	35.6529
HUN	K	NMVOC	25.3777	24.5545	27.4045	27.4045	27.4045	27.4045
HUN	K	NOx	1.27584	1.18444	0	0	0	0
HUN	K	PM10	3.09799	2.5673	3.13697	3.13697	3.13697	3.13697
HUN	K	PM2.5	0.507917	0.441355	0.50974	0.50974	0.50974	0.50974
HUN	K	SO2	0	0	0	0	0	0
HUN	L	CH4	0.724374	0.816499	0.973059	0.973059	0.973059	0.973059
HUN	L	CO	0.205023	0.217959	1.238	1.238	1.238	1.238
HUN	L	CO2	0	0	232.754	232.754	232.754	232.754
HUN	L	NH3	33.5664	35.2277	39.3251	39.3251	39.3251	39.3251
HUN	L	NMVOC	3.58823	3.39186	9.23899	9.23899	9.23899	9.23899
HUN	L	NOx	21.6287	22.7068	0.0426897	0.0426897	0.0426897	0.0426897
HUN	L	PM10	6.4893	6.13185	6.56552	6.56552	6.56552	6.56552
HUN	L	PM2.5	0.267957	0.255367	0.359181	0.359181	0.359181	0.359181
HUN	L	SO2	0.00104426	0.00111015	0.00526695	0.00526695	0.00526695	0.00526695
IRL	A	CH4	0.425543	0.422057	0.424608	0.424753	0.438386	0.389271
IRL	A	CO	6.04807	6.61163	10.418	10.4216	10.756	9.55099
IRL	A	CO2	8818.68	8120.93	10767.5	10771.2	11116.9	9871.38	9.03354	8.52529
IRL	A	NH3	0	0	0	0	0	0
IRL	A	NMVOC	0.28704	0.285868	0.2768	0.276895	0.285782	0.253764
IRL	A	NOx	5.98723	5.58555	4.70049	4.7021	4.85301	4.3093
IRL	A	PM10	0.361712	0.351024	0.38116	0.38129	0.393527	0.349438
IRL	A	PM2.5	0.239817	0.251426	0.246003	0.246087	0.253985	0.22553
IRL	A	SO2	2.23759	2.0021	2.83948	2.84045	2.93162	2.60317
IRL	B	CH4	0.328541	0.316678	0.40764	0.391795	0.302074	0.283569
IRL	B	CO	8.88894	8.90859	10.136	9.65435	7.51105	7.05092
IRL	B	CO2	7241.75	7018.36	8413.18	8026.67	6234.43	5852.5	6.58084	7.41992
IRL	B	NH3	0.132384	0.097338	0.330537	0.319749	0.244938	0.229933
IRL	B	NMVOC	32.6192	29.9672	33.6857	32.8571	24.9622	23.433
IRL	B	NOx	8.73755	8.38429	9.17504	8.7491	6.79899	6.38248
IRL	B	PM10	9.40694	9.38161	7.48151	7.12175	5.54403	5.2044
IRL	B	PM2.5	1.98101	2.03678	1.8233	1.73832	1.35112	1.26835
IRL	B	SO2	1.61773	1.38865	1.01077	0.963548	0.749013	0.703128
IRL	C	CH4	5.98347	6.27673	5.49345	5.56917	5.81967	5.88901
IRL	C	CO	82.1613	85.3718	19.5683	19.9306	20.9218	21.2011
IRL	C	CO2	8797.73	9365.05	8135.38	8011.44	8128.39	8148.22	7.75406	7.79715
IRL	C	NH3	0.111433	0.114933	0.0908001	0.0878443	0.0874817	0.0871571
IRL	C	NMVOC	10.2896	10.6765	7.66223	7.76873	8.11915	8.21619
IRL	C	NOx	8.18166	8.7505	7.6684	7.42143	7.39165	7.36466
IRL	C	PM10	6.89537	7.19982	6.24835	6.38941	6.73297	6.831
IRL	C	PM2.5	6.83646	7.14008	6.10997	6.2543	6.5972	6.69531
IRL	C	SO2	6.77972	7.15228	5.1895	5.32109	5.62183	5.70827
IRL	D	CH4	3.61915	3.64131	2.99131	2.86423	2.99131	2.99131
IRL	D	CO	0	0	0	0	0	0
IRL	D	CO2	0.285659	0.334385	0.204752	0.19708	0.204752	0.204752
IRL	D	NH3	0	0	0	0	0	0
IRL	D	NMVOC	3.69063	3.46467	3.28262	2.97237	3.28262	3.28262
IRL	D	NOx	0	0	0	0	0	0
IRL	D	PM10	0.128592	0.128804	0.13013	0.11831	0.13013	0.13013
IRL	D	PM2.5	0.0128592	0.0128804	0.013013	0.011827	0.013013	0.013013
IRL	D	SO2	0	0	0	0	0	0
IRL	E	CH4	0	0	0	0	0	0
IRL	E	CO	0.196575	0.183229	0.127264	0.127261	0.127264	0.127264
IRL	E	CO2	105.112	100.949	119.547	119.547	119.547	119.547
IRL	E	NH3	0.0147851	0.0137953	0.0095663	0.009566	0.0095663	0.0095663
IRL	E	NMVOC	19.3815	18.1671	18.7587	18.6177	18.7587	18.7587
IRL	E	NOx	0.0064227	0.00598596	0.00415839	0.00415616	0.00415839	0.00415839
IRL	E	PM10	0.13455	0.131287	0.102565	0.102565	0.102565	0.102565
IRL	E	PM2.5	0.121206	0.117304	0.0886064	0.0886064	0.0886064	0.0886064
IRL	E	SO2	0.000114783	2.85476e-05	0.000106277	0.000106254	0.000106277	0.000106277
IRL	F	CH4	0.332679	0.240836	0.241047	0.188596	0.180397	0.149608
IRL	F	CO	25.4728	17.8847	18.2945	14.2949	13.6914	11.3546
IRL	F	CO2	11508.6	9591.65	12032.1	9546.81	9004.73	7467.85	11.7361	11.2261
IRL	F	NH3	0.545828	0.431741	0.342436	0.264945	0.256275	0.212535
IRL	F	NMVOC	3.34053	2.76065	2.38628	1.84195	1.78587	1.48106
IRL	F	NOx	33.5369	25.9345	33.5298	27.0653	25.0934	20.8106
IRL	F	PM10	1.63861	1.29175	2.16383	1.74748	1.61939	1.343
IRL	F	PM2.5	1.37135	1.0953	1.37291	1.10742	1.02747	0.852106
IRL	F	SO2	0.0400656	0.0337226	0.0460516	0.0365649	0.0344646	0.0285823
IRL	H	CH4	0.025419	0.00871415	0.000381973	0.000155991	0.000250905	0.000158947
IRL	H	CO	1.43778	0.415414	1.44904	0.591763	0.951823	0.602974
IRL	H	CO2	3337.3	1191.03	367.051	149.898	241.103	152.738	4.00474	1.5042
IRL	H	NH3	0	0	0	0	0	0
IRL	H	NMVOC	0.169476	0.048384	0.171391	0.0699933	0.112581	0.0713194
IRL	H	NOx	1.51416	0.56676	1.47803	0.603602	0.970864	0.615037
IRL	H	PM10	0.00747685	0.00380949	0.0111671	0.00456046	0.00733529	0.00464686
IRL	H	PM2.5	0.00747685	0.00380949	0.0111671	0.00456046	0.00733529	0.00464686
IRL	H	SO2	0.0997755	0.0342051	0.0980064	0.0400242	0.064377	0.0407824
IRL	I	CH4	0.00944992	0.00813904	0.0365506	0.0362209	0.0365506	0.0365506
IRL	I	CO	1.69912	1.55361	1.53849	1.51829	1.53849	1.53849
IRL	I	CO2	264.104	244.983	740.971	731.502	740.971	740.971
IRL	I	NH3	0.00148923	0.00143597	0.00147564	0.00144887	0.00147564	0.00147564
IRL	I	NMVOC	0.444953	0.372579	0.393588	0.389211	0.393588	0.393588
IRL	I	NOx	6.0891	5.11031	4.40149	4.33084	4.40149	4.40149
IRL	I	PM10	0.172539	0.143237	0.146865	0.144645	0.146865	0.146865
IRL	I	PM2.5	0.167571	0.139326	0.14429	0.142085	0.14429	0.14429
IRL	I	SO2	0.00263303	0.00250382	0.00230726	0.00229061	0.00230726	0.00230726
IRL	J	CH4	30.3045	30.0235	30.3229	30.3229	30.3229	30.3229
IRL	J	CO	0.146734	0.146882	0.234651	0.234651	0.234651	0.234651
IRL	J	CO2	31.9742	29.2491	23.4778	23.4778	23.4778	23.4778
IRL	J	NH3	0.0621838	0.0621838	0.0358718	0.0358718	0.0358718	0.0358718
IRL	J	NMVOC	0.502624	0.494855	0.504668	0.504668	0.504668	0.504668
IRL	J	NOx	0.0139153	0.0146483	0.0125133	0.0125133	0.0125133	0.0125133
IRL	J	PM10	0.248972	0.255695	0.287122	0.287122	0.287122	0.287122
IRL	J	PM2.5	0.24887	0.255602	0.287011	0.287011	0.287011	0.287011
IRL	J	SO2	0.00123384	0.00135604	0.0011193	0.0011193	0.0011193	0.0011193
IRL	K	CH4	548.789	555.453	518.804	518.804	518.804	518.804
IRL	K	CO	0	0	0	0	0	0
IRL	K	CO2	0	0	0	0	0	0
IRL	K	NH3	59.3732	60.0092	55.6777	55.6777	55.6777	55.6777
IRL	K	NMVOC	40.9368	41.4227	42.547	42.547	42.547	42.547
IRL	K	NOx	0.969506	0.989011	0	0	0	0
IRL	K	PM10	1.65801	1.71392	1.58058	1.58058	1.58058	1.58058
IRL	K	PM2.5	0.639485	0.652445	0.601284	0.601284	0.601284	0.601284
IRL	K	SO2	0	0	0	0	0	0
IRL	L	CH4	0	0	0.246225	0.246225	0.246225	0.246225
IRL	L	CO	0	0	2.19707	2.19707	2.19707	2.19707
IRL	L	CO2	0	0	580.065	580.065	580.065	580.065
IRL	L	NH3	65.1775	62.6727	64.6712	64.6712	64.6712	64.6712
IRL	L	NMVOC	4.69737	4.69568	18.8896	18.8896	18.8896	18.8896
IRL	L	NOx	32.7993	33.4488	0.218807	0.218807	0.218807	0.218807
IRL	L	PM10	7.16748	7.13938	7.25396	7.25396	7.25396	7.25396
IRL	L	PM2.5	0.287237	0.285118	0.406899	0.406899	0.406899	0.406899
IRL	L	SO2	0	0	0.00934722	0.00934722	0.00934722	0.00934722
ITA	A	CH4	4.13373	4.05055	4.00665	3.76457	3.78335	3.72065
ITA	A	CO	20.5485	19.1133	17.6756	16.6076	16.6905	16.4138
ITA	A	CO2	67034.4	59920.9	71640.3	67311.8	67647.6	66526.4	93.8791	87.7492
ITA	A	NH3	0.0866449	0.0642353	0.112589	0.105787	0.106315	0.104553
ITA	A	NMVOC	2.58083	2.40069	2.22021	2.08607	2.09648	2.06173
ITA	A	NOx	26.6826	23.8471	23.4862	22.0671	22.1772	21.8097
ITA	A	PM10	0.456712	0.396271	0.316789	0.297648	0.299133	0.294175
ITA	A	PM2.5	0.319248	0.293979	0.203982	0.191657	0.192613	0.189421
ITA	A	SO2	6.70638	4.97668	3.30887	3.10895	3.12446	3.07267
ITA	B	CH4	14.8361	13.7473	15.011	13.8932	11.3464	11.0024
ITA	B	CO	199.596	167.45	104.725	94.8776	79.1588	76.7591
ITA	B	CO2	88256.5	79979.4	87766.6	78795.7	66340.1	64329	54.3869	47.9728
ITA	B	NH3	1.61525	1.40806	1.33884	1.22203	1.01199	0.981309
ITA	B	NMVOC	47.2061	50.4426	43.0227	39.6974	32.5196	31.5337
ITA	B	NOx	68.7884	59.5675	62.0374	55.678	46.8922	45.4706
ITA	B	SO2	45.2606	43.0111	38.1126	34.2814	28.8082	27.9349
ITA	C	CH4	92.8952	89.5281	94.5257	95.928	101.398	101.843
ITA	C	CO	1267.68	1204.59	1310.17	1337.3	1421.41	1428.91
ITA	C	CO2	76069.1	74582.7	101291	98470.9	100372	100140	73.438	72.7455
ITA	C	NH3	1.28436	1.2172	1.33075	1.36107	1.44925	1.45733
ITA	C	NMVOC	171.29	164.316	180.778	179.514	186.452	186.661
ITA	C	NOx	85.8574	82.9043	91.2033	86.4992	85.6117	85.0151
ITA	C	PM10	94.0105	89.8873	96.8851	99.0485	105.425	106.006
ITA	C	PM2.5	92.8302	88.7599	95.6826	97.8184	104.115	104.688
ITA	C	SO2	9.96496	9.77547	9.09802	8.51301	8.37847	8.30303
ITA	D	CH4	152.925	154.109	159.604	159.264	159.604	159.604
ITA	D	CO	0.0812816	0.0766014	0.0812528	0.0701059	0.0812528	0.0812528
ITA	D	CO2	2756.34	2112.52	2295.27	2235.26	2295.27	2295.27
ITA	D	NH3	1.22397	1.20222	2.99786	2.98706	2.99786	2.99786
ITA	D	NMVOC	35.926	34.009	35.3069	31.8664	35.3069	35.3069
ITA	D	NOx	5.72278	4.9949	5.59018	4.82328	5.59018	5.59018
ITA	D	PM10	0.509777	0.36623	0.47384	0.426813	0.47384	0.47384
ITA	D	PM2.5	0.111276	0.0773855	0.091955	0.0811377	0.091955	0.091955
ITA	D	SO2	16.936	15.0439	19.7607	17.0498	19.7607	19.7607
ITA	E	CH4	0	0	0	0	0	0
ITA	E	CO	4.03199	3.87821	4.23099	4.23099	4.23099	4.23099
ITA	E	CO2	1095.2	1090.71	1096.72	1096.72	1096.72	1096.72
ITA	E	NH3	0.30137	0.290625	0.31059	0.31059	0.31059	0.31059
ITA	E	NMVOC	371.662	384.98	369.206	365.671	369.206	369.206
ITA	E	NOx	0.13183	0.126765	0.138614	0.138614	0.138614	0.138614
ITA	E	PM10	2.18273	1.9505	3.33281	3.33281	3.33281	3.33281
ITA	E	PM2.5	1.97441	1.81673	2.61311	2.61311	2.61311	2.61311
ITA	E	SO2	0.0129537	0.00826149	0.0453	0.0453	0.0453	0.0453
ITA	F	CH4	7.4553	5.91404	5.93179	4.49949	4.36114	3.96314
ITA	F	CO	389.647	293.98	309.005	235.2	227.185	206.452
ITA	F	CO2	96604.1	77832	96196	74794.5	70724.8	64270.3	91.1259	81.8396
ITA	F	NH3	5.70442	4.47359	4.71218	3.57462	3.46447	3.14829
ITA	F	NMVOC	103.122	91.7413	71.0072	53.4868	52.2056	47.4412
ITA	F	NOx	270.855	213.285	242.257	189.089	178.111	161.856
ITA	F	PM10	19.3688	15.4581	17.5605	13.6161	12.9107	11.7325
ITA	F	PM2.5	13.4964	10.6358	11.7914	9.11854	8.66921	7.87804
ITA	F	SO2	0.388261	0.320598	0.356342	0.27545	0.261988	0.238079
ITA	H	CH4	0.124853	0.0475527	0.0390148	0.0157954	0.0232008	0.0178871
ITA	H	CO	5.77466	2.1906	5.63838	2.28274	3.35296	2.58503
ITA	H	CO2	14781.3	4982.72	1765.99	714.974	1050.18	809.651	16.9338	5.91734
ITA	H	NH3	0	0	0	0	0	0
ITA	H	NMVOC	0.816727	0.306342	0.797821	0.323004	0.474439	0.365777
ITA	H	NOx	7.9215	3.00749	7.632	3.08988	4.53851	3.49904
ITA	H	PM10	0.0586119	0.0238798	0.0580228	0.023491	0.0345043	0.0266017
ITA	H	PM2.5	0.0586119	0.0238798	0.0580228	0.023491	0.0345043	0.0266017
ITA	H	SO2	0.579747	0.218577	0.560843	0.227062	0.333516	0.25713
ITA	I	CH4	0.0932356	0.116304	0.456126	0.456126	0.456126	0.456126
ITA	I	CO	64.3462	71.9518	60.9408	60.1926	60.9408	60.9408
ITA	I	CO2	1265.96	1435.81	7791.31	7791.31	7791.31	7791.31
ITA	I	NH3	0.017453	0.0174445	0.0173194	0.0169944	0.0173194	0.0173194
ITA	I	NMVOC	9.21767	9.10497	9.28389	9.15925	9.28389	9.28389
ITA	I	NOx	42.261	40.0855	40.2447	39.648	40.2447	40.2447
ITA	I	PM10	2.74244	2.45561	2.48565	2.45346	2.48565	2.48565
ITA	I	PM2.5	2.73993	2.45352	2.48308	2.45089	2.48308	2.48308
ITA	I	SO2	0.171558	0.232142	0.141256	0.14061	0.141256	0.141256
ITA	J	CH4	642.248	671.872	652.85	652.85	652.85	652.85
ITA	J	CO	43.9522	44.9023	44.0058	44.0058	44.0058	44.0058
ITA	J	CO2	95.6205	92.7402	91.476	91.476	91.476	91.476
ITA	J	NH3	8.59794	8.96177	9.01641	9.01641	9.01641	9.01641
ITA	J	NMVOC	10.3124	10.768	10.4265	10.4265	10.4265	10.4265
ITA	J	NOx	2.10695	2.17846	2.07588	2.07588	2.07588	2.07588
ITA	J	PM10	6.51378	6.53796	2.89793	2.89793	2.89793	2.89793
ITA	J	PM2.5	2.54893	6.18345	2.55207	2.55207	2.55207	2.55207
ITA	J	SO2	0.155076	0.155283	0.162831	0.162831	0.162831	0.162831
ITA	K	CH4	700.085	707.281	707.294	707.294	707.294	707.294
ITA	K	CO	0	0	0	0	0	0
ITA	K	CO2	0	0	0	0	0	0
ITA	K	NH3	195.483	195.668	206.11	206.11	206.11	206.11
ITA	K	NMVOC	99.2367	100.958	108.82	108.82	108.82	108.82
ITA	K	NOx	1.62316	1.63613	0	0	0	0
ITA	K	PM10	10.7806	10.8706	10.6127	10.6127	10.6127	10.6127
ITA	K	PM2.5	2.77025	2.78193	2.75564	2.75564	2.75564	2.75564
ITA	K	SO2	0	0	0	0	0	0
ITA	L	CH4	63.9204	63.8811	61.6047	61.6047	61.6047	61.6047
ITA	L	CO	12.0448	12.0944	16.236	16.236	16.236	16.236
ITA	L	CO2	0	0	736.608	736.608	736.608	736.608
ITA	L	NH3	134.893	149.318	138.743	138.743	138.743	138.743
ITA	L	NMVOC	22.9564	23.3915	27.4051	27.4051	27.4051	27.4051
ITA	L	NOx	47.2851	53.3967	0.559862	0.559862	0.559862	0.559862
ITA	L	PM10	12.3794	12.374	11.8536	11.8536	11.8536	11.8536
ITA	L	PM2.5	2.52753	2.54979	1.81818	1.81818	1.81818	1.81818
ITA	L	SO2	0.0769083	0.0777287	0.0690744	0.0690744	0.0690744	0.0690744
LTU	A	CH4	0.894131	0.945549	1.04297	1.01758	1.06256	0.948295
LTU	A	CO	7.13215	7.00537	9.36603	9.13808	9.54204	8.51587
LTU	A	CO2	845.681	1296.29	3923.5	3828.01	3997.23	3567.36	1.52009	1.34096
LTU	A	NH3	0.184806	0.181587	1.01925	0.994439	1.0384	0.926728
LTU	A	NMVOC	0.662667	0.665381	0.411189	0.401181	0.418916	0.373865
LTU	A	NOx	5.48621	5.61822	2.8844	2.8142	2.9386	2.62258
LTU	A	PM10	0.717041	0.682551	0.0880609	0.0859177	0.0897158	0.0800676
LTU	A	PM2.5	0.693017	0.659866	0.0738115	0.0720151	0.0751986	0.0671116
LTU	A	SO2	0.48616	0.505405	0.988908	0.96484	1.00749	0.899144
LTU	B	CH4	0.234152	0.243622	0.226629	0.22802	0.187516	0.180901
LTU	B	CO	4.58094	4.25325	5.37172	5.42094	4.44463	4.28783
LTU	B	CO2	5306.67	4873.53	5529.96	5576.28	4575.57	4414.14	3.38352	3.33463
LTU	B	NH3	0.53878	0.580236	0.706067	0.71769	0.584209	0.563599
LTU	B	NMVOC	5.38272	5.42352	6.25978	6.37064	5.17943	4.9967
LTU	B	NOx	5.61494	5.85791	4.84255	4.87128	4.00679	3.86543
LTU	B	PM10	6.97546	6.92352	1.20502	1.21326	0.997051	0.961876
LTU	B	PM2.5	1.03392	1.00259	0.597583	0.601171	0.494448	0.477004
LTU	B	SO2	4.09732	4.08029	3.04385	3.05091	2.51852	2.42967
LTU	C	CH4	6.21298	6.09196	5.46352	5.50731	5.59333	5.65081
LTU	C	CO	81.4918	77.8953	74.345	75.3361	77.0427	77.9859
LTU	C	CO2	1265.62	1184.02	2923.4	2915.26	2918.72	2936.99	1.39176	1.35102
LTU	C	NH3	0.16642	0.173052	0.520587	0.522688	0.528021	0.532577
LTU	C	NMVOC	8.51059	8.16488	8.38354	8.49588	8.68912	8.79574
LTU	C	NOx	3.01265	2.9553	1.91149	1.88821	1.86622	1.87101
LTU	C	PM10	3.37856	3.12195	2.20837	2.23065	2.27159	2.29662
LTU	C	PM2.5	3.14545	2.90087	2.01765	2.03765	2.07456	2.09728
LTU	C	SO2	1.17615	1.00576	1.17631	1.14726	1.11398	1.11125
LTU	D	CH4	11.7281	10.0593	11.4237	11.4235	11.4237	11.4237
LTU	D	CO	0.59	0.74289	0	0	0	0
LTU	D	CO2	233.942	181.61	253.596	253.583	253.596	253.596
LTU	D	NH3	0.01	0.01	0.0106581	0.0105951	0.0106581	0.0106581
LTU	D	NMVOC	12.1597	10.0741	2.68155	2.61554	2.68155	2.68155
LTU	D	NOx	0.03	0.038	0.0310692	0.0308854	0.0310692	0.0310692
LTU	D	PM10	0.0200652	0.0104477	0.0214387	0.019778	0.0214387	0.0214387
LTU	D	PM2.5	0.00200652	0.00104477	0.00214387	0.0019778	0.00214387	0.00214387
LTU	D	SO2	5.75	5.31541	6.01429	5.97871	6.01429	6.01429
LTU	E	CH4	0	0	0	0	0	0
LTU	E	CO	0.00509559	0.0034457	0.25051	0.25051	0.25051	0.25051
LTU	E	CO2	59.2536	54.8278	30.6441	30.6441	30.6441	30.6441
LTU	E	NH3	0	0	0.0465867	0.0465867	0.0465867	0.0465867
LTU	E	NMVOC	7.74318	5.77362	5.26964	5.27159	5.26964	5.26964
LTU	E	NOx	0.000185294	0.000125298	0.0696822	0.0696822	0.0696822	0.0696822
LTU	E	PM10	0.07121	0.0481531	0.0747328	0.0747328	0.0747328	0.0747328
LTU	E	PM2.5	0.0370161	0.0250307	0.0747328	0.0747328	0.0747328	0.0747328
LTU	E	SO2	0.00215226	0.00145539	0.0086	0.0086	0.0086	0.0086
LTU	F	CH4	0.237239	0.269767	0.632324	0.555614	0.560282	0.506655
LTU	F	CO	14.0883	12.6793	25.3536	22.3267	22.465	20.3148
LTU	F	CO2	5995.55	5854.41	6339.96	5705.14	5617.63	5079.95	5.7612	6.66379
LTU	F	NH3	0.153322	0.201762	0.182742	0.159372	0.161922	0.146423
LTU	F	NMVOC	2.07544	1.8036	3.00295	2.74746	2.66081	2.40614
LTU	F	NOx	26.4804	24.4062	22.5232	21.3812	19.957	18.0469
LTU	F	PM10	1.46567	1.29136	1.39108	1.24953	1.23259	1.11461
LTU	F	PM2.5	1.11208	0.959214	1.23596	1.10935	1.09514	0.990323
LTU	F	SO2	0.0351026	0.0357561	0.027761	0.0251495	0.0245981	0.0222437
LTU	H	CH4	0.002595	0.0011475	1.4e-05	6.62703e-06	8.02139e-06	6.20055e-06
LTU	H	CO	0.296299	0.0233596	0.380033	0.179892	0.217743	0.168315
LTU	H	CO2	371.95	164.467	52.862	25.0227	30.2877	23.4124	0.619947	0.284326
LTU	H	NH3	0	0	0	0	0	0
LTU	H	NMVOC	0.0429542	0.00167689	0.01	0.00473359	0.00572957	0.00442896
LTU	H	NOx	1.40238	0.635952	1.37545	0.651083	0.788075	0.609183
LTU	H	PM10	0	0	0.01	0.00473359	0.00572957	0.00442896
LTU	H	PM2.5	0.0222694	0	0.01	0.00473359	0.00572957	0.00442896
LTU	H	SO2	0.0880691	0.00159074	0.0856623	0.0405491	0.0490808	0.0379395
LTU	I	CH4	0.0114816	0.0112208	0.0250795	0.0250702	0.0250795	0.0250795
LTU	I	CO	2.17855	1.95078	2.35895	2.3577	2.35895	2.35895
LTU	I	CO2	227.903	224.721	416.082	415.976	416.082	416.082
LTU	I	NH3	0.000760825	0.000713781	0.00091091	0.000910647	0.00091091	0.00091091
LTU	I	NMVOC	0.499265	0.445788	0.525475	0.525264	0.525475	0.525475
LTU	I	NOx	4.67731	4.24973	4.946	4.94564	4.946	4.946
LTU	I	PM10	0.122028	0.109343	0.121549	0.121538	0.121549	0.121549
LTU	I	PM2.5	0.113603	0.101721	0.113082	0.113072	0.113082	0.113082
LTU	I	SO2	0.14059	0.127618	0.127209	0.127139	0.127209	0.127209
LTU	J	CH4	30.4443	29.8434	34.0395	34.0395	34.0395	34.0395
LTU	J	CO	2.84018	2.84019	2.84177	2.84177	2.84177	2.84177
LTU	J	CO2	1.68071	2.10853	0.868532	0.868532	0.868532	0.868532
LTU	J	NH3	0.413732	0.412809	0.417822	0.417822	0.417822	0.417822
LTU	J	NMVOC	0.605734	0.395429	0.612992	0.612992	0.612992	0.612992
LTU	J	NOx	0.163035	0.164116	0.165204	0.165204	0.165204	0.165204
LTU	J	PM10	0.489479	0.470657	0.523926	0.523926	0.523926	0.523926
LTU	J	PM2.5	0.469415	0.450615	0.507575	0.507575	0.507575	0.507575
LTU	J	SO2	0.0102166	0.0102835	0.00580801	0.00580801	0.00580801	0.00580801
LTU	K	CH4	68.5018	67.0816	69.4734	69.4734	69.4734	69.4734
LTU	K	CO	0	0	0	0	0	0
LTU	K	CO2	0	0	0	0	0	0
LTU	K	NH3	10.6533	11.1597	8.73187	8.73187	8.73187	8.73187
LTU	K	NMVOC	8.97211	8.90895	10.8351	10.8351	10.8351	10.8351
LTU	K	NOx	0.173781	0.167605	0	0	0	0
LTU	K	PM10	0.537776	0.524448	0.546404	0.546404	0.546404	0.546404
LTU	K	PM2.5	0.135752	0.132065	0.140735	0.140735	0.140735	0.140735
LTU	K	SO2	0	0	0	0	0	0
LTU	L	CH4	0	0	0.082147	0.082147	0.082147	0.082147
LTU	L	CO	0	0	0.733	0.733	0.733	0.733
LTU	L	CO2	0	0	45.4229	45.4229	45.4229	45.4229
LTU	L	NH3	23.27	25.4819	28.3417	28.3417	28.3417	28.3417
LTU	L	NMVOC	5.59607	5.63341	4.94009	4.94009	4.94009	4.94009
LTU	L	NOx	8.82	9.8014	0.0252759	0.0252759	0.0252759	0.0252759
LTU	L	PM10	4.54258	4.56666	4.74058	4.74058	4.74058	4.74058
LTU	L	PM2.5	0.266958	0.269085	0.240655	0.240655	0.240655	0.240655
LTU	L	SO2	0	0	0.00311847	0.00311847	0.00311847	0.00311847
LUX	A	CH4	0.176935	0.242277	0.134987	0.13129	0.119359	0.123148
LUX	A	CO	1.10589	1.77732	0.499773	0.486083	0.441913	0.455941
LUX	A	CO2	223.304	213.11	607.106	590.477	536.82	553.861	0.450339	0.397271
LUX	A	NH3	0.133375	0.217887	0.0797644	0.0775795	0.0705299	0.0727688
LUX	A	NMVOC	0.165629	0.182505	0.137675	0.133903	0.121736	0.1256
LUX	A	NOx	0.715359	0.920517	0.447314	0.435062	0.395528	0.408083
LUX	A	PM10	0.104723	0.182531	0.0895994	0.0871451	0.0792262	0.0817412
LUX	A	PM2.5	0.101522	0.177108	0.0869529	0.0845712	0.0768862	0.0793268
LUX	A	SO2	0.0457266	0.0724487	0.0207566	0.020188	0.0183535	0.0189361
LUX	B	CH4	0.0816012	0.0855564	0.0837905	0.0763944	0.0601576	0.0595964
LUX	B	CO	7.54472	4.3665	4.89557	4.45395	3.51479	3.482
LUX	B	CO2	1796.37	1643.7	1545.84	1415.15	1109.84	1099.49	1.32824	1.17747
LUX	B	NH3	0.00524546	0.00525588	0.0163586	0.0148786	0.0117447	0.0116351
LUX	B	NMVOC	0.656397	0.675424	0.48197	0.451879	0.346031	0.342803
LUX	B	NOx	2.77093	2.7118	2.06146	1.88627	1.48003	1.46623
LUX	B	PM10	0.311539	0.324856	0.246137	0.224882	0.176715	0.175066
LUX	B	PM2.5	0.207171	0.241451	0.136938	0.124878	0.0983152	0.097398
LUX	B	SO2	0.794381	0.630217	0.821315	0.747097	0.589666	0.584165
LUX	C	CH4	0.381264	0.387633	0.49395	0.49308	0.517862	0.516899
LUX	C	CO	2.23101	2.081	3.87196	3.91215	4.15419	4.1497
LUX	C	CO2	1621.06	1603.56	1723.83	1654.11	1672.7	1665	1.94342	1.83124
LUX	C	NH3	0.0299121	0.0283413	0.0591644	0.0606119	0.065158	0.0651436
LUX	C	NMVOC	0.333783	0.309281	0.578544	0.579407	0.610392	0.609385
LUX	C	NOx	1.27472	1.21527	1.23424	1.15873	1.14579	1.13862
LUX	C	PM10	0.332094	0.311735	0.651691	0.664711	0.711818	0.711469
LUX	C	PM2.5	0.324445	0.304691	0.635567	0.64819	0.694056	0.693711
LUX	C	SO2	0.0311183	0.0313945	0.0270923	0.027727	0.0297672	0.0297593
LUX	D	CH4	1.24572	1.12423	1.00227	1.00227	1.00227	1.00227
LUX	D	CO	0	0	0	0	0	0
LUX	D	CO2	0.0408006	0.036977	0.0406311	0.0406311	0.0406311	0.0406311
LUX	D	NH3	0	0	0	0	0	0
LUX	D	NMVOC	0.541531	0.464765	0.462369	0.440489	0.462369	0.462369
LUX	D	NOx	0	0	0	0	0	0
LUX	D	PM10	0.000559165	0.00047085	0.000460875	0.000424972	0.000460875	0.000460875
LUX	D	PM2.5	5.59165e-05	4.7085e-05	4.60875e-05	4.24972e-05	4.60875e-05	4.60875e-05
LUX	D	SO2	0	0	0	0	0	0
LUX	E	CH4	0	0	0	0	0	0
LUX	E	CO	0.0294954	0.0288748	0.0226091	0.0226084	0.0226091	0.0226091
LUX	E	CO2	33.8222	29.0303	31.5904	31.5904	31.5904	31.5904
LUX	E	NH3	0.00221102	0.0021715	0.00168638	0.00168633	0.00168638	0.00168638
LUX	E	NMVOC	5.17695	4.56793	4.3473	4.31461	4.3473	4.3473
LUX	E	NOx	0.000964069	0.00094344	0.000739399	0.000739003	0.000739399	0.000739399
LUX	E	PM10	0.0163334	0.0147373	0.0140292	0.0140292	0.0140292	0.0140292
LUX	E	PM2.5	0.0153978	0.0144446	0.012561	0.012561	0.012561	0.012561
LUX	E	SO2	5.889e-05	1.8422e-05	9.2412e-05	9.23919e-05	9.2412e-05	9.2412e-05
LUX	F	CH4	0.147675	0.121672	0.0759379	0.0655162	0.0567315	0.056479
LUX	F	CO	8.53268	6.18346	2.94933	2.57348	2.20338	2.19357
LUX	F	CO2	6087.98	4613.21	1862.07	1637.44	1391.11	1384.92	6.21649	6.03272
LUX	F	NH3	0.206234	0.163555	0.0599628	0.0522606	0.0447968	0.0445975
LUX	F	NMVOC	0.792411	0.607252	0.330508	0.285689	0.246915	0.245816
LUX	F	NOx	11.7958	8.23456	5.09707	4.43788	3.8079	3.79095
LUX	F	PM10	0.761261	0.591537	0.489034	0.438933	0.365346	0.36372
LUX	F	PM2.5	0.465392	0.35889	0.279531	0.250753	0.208831	0.207902
LUX	F	SO2	0.0362307	0.0279455	0.00965816	0.00850651	0.00721539	0.00718328
LUX	H	CH4	0.00644858	0.00349504	4.03e-06	2.17458e-06	2.79797e-06	1.78267e-06
LUX	H	CO	0.791989	0.492867	0.663969	0.358276	0.460984	0.293707
LUX	H	CO2	1798.59	1636.98	104.773	56.5353	72.7424	46.3463	1.23096	0.961499
LUX	H	NH3	0	0	0	0	0	0
LUX	H	NMVOC	0.0727671	0.0409283	0.0575861	0.0310733	0.0399812	0.0254732
LUX	H	NOx	1.00931	0.803857	0.643774	0.347379	0.446963	0.284773
LUX	H	PM10	0.00566714	0.00308216	0.00440214	0.00237539	0.00305634	0.00194728
LUX	H	PM2.5	0.00566714	0.00308216	0.00440214	0.00237539	0.00305634	0.00194728
LUX	H	SO2	0.055662	0.0301866	0.0431698	0.0232943	0.0299722	0.0190961
LUX	I	CH4	0.00020179	0.000203343	0.00813915	0.00806527	0.00813915	0.00813915
LUX	I	CO	1.68361	1.67588	1.70947	1.65557	1.70947	1.70947
LUX	I	CO2	6.88058	6.99534	218.066	197.302	218.066	218.066
LUX	I	NH3	0.000382593	0.000386753	0.000380797	0.000348078	0.000380797	0.000380797
LUX	I	NMVOC	0.160706	0.156629	0.149035	0.146319	0.149035	0.149035
LUX	I	NOx	0.99124	0.938604	1.10125	1.0046	1.10125	1.10125
LUX	I	PM10	0.029437	0.0271983	0.0330212	0.0311979	0.0330212	0.0330212
LUX	I	PM2.5	0.029437	0.0271983	0.0330212	0.0311979	0.0330212	0.0330212
LUX	I	SO2	0.00368568	0.00380463	0.00372957	0.00359702	0.00372957	0.00372957
LUX	J	CH4	2.68539	2.60144	2.88915	2.88915	2.88915	2.88915
LUX	J	CO	0	0	0	0	0	0
LUX	J	CO2	0	0	0	0	0	0
LUX	J	NH3	0.0389722	0.03937	0.0113789	0.0113789	0.0113789	0.0113789
LUX	J	NMVOC	0.0164296	0.0159761	0.013908	0.013908	0.013908	0.013908
LUX	J	NOx	0	0	0	0	0	0
LUX	J	PM10	0.093761	0.102313	0.0851198	0.0851198	0.0851198	0.0851198
LUX	J	PM2.5	0.0930006	0.10174	0.0842481	0.0842481	0.0842481	0.0842481
LUX	J	SO2	0	0	0	0	0	0
LUX	K	CH4	18.1618	18.659	18.5349	18.5349	18.5349	18.5349
LUX	K	CO	0	0	0	0	0	0
LUX	K	CO2	0	0	0	0	0	0
LUX	K	NH3	2.34228	2.35103	2.54166	2.54166	2.54166	2.54166
LUX	K	NMVOC	2.70454	2.81628	3.14904	3.14904	3.14904	3.14904
LUX	K	NOx	0.0762413	0.0762057	0	0	0	0
LUX	K	PM10	0.0606196	0.0614342	0.0810245	0.0810245	0.0810245	0.0810245
LUX	K	PM2.5	0.0310608	0.0313849	0.0440877	0.0440877	0.0440877	0.0440877
LUX	K	SO2	0	0	0	0	0	0
LUX	L	CH4	0	0	0	0	0	0
LUX	L	CO	0	0	0	0	0	0
LUX	L	CO2	0	0	10.9789	10.9789	10.9789	10.9789
LUX	L	NH3	3.36904	3.34022	3.00746	3.00746	3.00746	3.00746
LUX	L	NMVOC	0.778376	0.804684	0.800776	0.800776	0.800776	0.800776
LUX	L	NOx	1.20221	1.16012	0	0	0	0
LUX	L	PM10	0.205283	0.206133	0.205232	0.205232	0.205232	0.205232
LUX	L	PM2.5	0.00789551	0.00792819	0.00789355	0.00789355	0.00789355	0.00789355
LUX	L	SO2	0	0	0	0	0	0
LVA	A	CH4	0.631442	0.599921	0.696099	0.683612	0.687123	0.648009
LVA	A	CO	2.38703	2.27271	2.64308	2.59566	2.609	2.46048
LVA	A	CO2	1719.53	1280.37	4109.24	4035.53	4056.26	3825.36	1.84504	1.12834
LVA	A	NH3	0	0	0	0	0	0
LVA	A	NMVOC	0.211111	0.192725	0.231056	0.226911	0.228077	0.215094
LVA	A	NOx	3.73477	3.27964	4.05184	3.97916	3.9996	3.77192
LVA	A	PM10	3.10877	2.98436	3.43249	3.37092	3.38823	3.19536
LVA	A	PM2.5	2.66928	2.56248	2.94722	2.89435	2.90921	2.74361
LVA	A	SO2	0.944042	0.888852	0.983661	0.966016	0.970977	0.915706
LVA	B	CH4	0.598164	0.617494	0.631201	0.596445	0.51829	0.51261
LVA	B	CO	7.31021	7.63549	11.6476	11.009	9.56408	9.45927
LVA	B	CO2	1308.01	1259.99	2996.08	2837.73	2460.13	2433.17	1.49653	1.48341
LVA	B	NH3	0.464411	0.480148	0.629522	0.595158	0.516911	0.511246
LVA	B	NMVOC	1.99875	2.00055	6.50866	6.26108	5.34437	5.28581
LVA	B	NOx	5.37492	5.31293	4.26142	4.02894	3.49912	3.46078
LVA	B	PM10	7.33951	7.33376	7.59893	7.16574	6.23961	6.17123
LVA	B	PM2.5	1.82749	1.86901	2.89156	2.73161	2.3743	2.34829
LVA	B	SO2	0.946991	1.03843	0.823173	0.777306	0.675921	0.668514
LVA	C	CH4	6.56697	5.7358	5.17236	5.13254	5.22809	5.21905
LVA	C	CO	78.5718	68.757	63.5284	64.2401	65.9116	65.8868
LVA	C	CO2	1260.2	1299.41	2970.57	2935.34	2985.54	2979.43	1.03839	0.988136
[truncated: 870 more rows]

## Sheet: comparison_month_emissions
ISO3	GNFR	Month	POLL	CAMS-REG_v5.1_2020_business-as-usual_Gg	CAMS-REG_v5.1_2020_guevaraetal_Gg	CAMS-REG_v5.1_2020_doumbiaetal_Gg	CAMS-REG_v5.1_2020_forsteretal_Gg	liuetal_2019_Tg	liuetal_2020_Tg
AUT	A	1	CH4	0.0884018	0.0884018	0.0884018	0.0884018
AUT	A	1	CO2	1265.05	1265.05	1265.05	1265.05	2.18277	2.56455
AUT	A	1	CO	0.398568	0.398568	0.398568	0.398568
AUT	A	1	NH3	0.0337555	0.0337555	0.0337555	0.0337555
AUT	A	1	NMVOC	0.0311597	0.0311597	0.0311597	0.0311597
AUT	A	1	NOx	0.841642	0.841642	0.841642	0.841642
AUT	A	1	PM10	0.0970757	0.0970757	0.0970757	0.0970757
AUT	A	1	PM2.5	0.0809856	0.0809856	0.0809856	0.0809856
AUT	A	1	SO2	0.0760264	0.0760264	0.0760264	0.0760264
AUT	A	2	CH4	0.0783876	0.0783876	0.0783876	0.078366
AUT	A	2	CO2	1121.74	1121.74	1121.74	1121.43	1.73422	1.41756
AUT	A	2	CO	0.353418	0.353418	0.353418	0.35332
AUT	A	2	NH3	0.0299317	0.0299317	0.0299317	0.0299234
AUT	A	2	NMVOC	0.0276299	0.0276299	0.0276299	0.0276223
AUT	A	2	NOx	0.746301	0.746301	0.746301	0.746095
AUT	A	2	PM10	0.086079	0.086079	0.086079	0.0860552
AUT	A	2	PM2.5	0.0718115	0.0718115	0.0718115	0.0717917
AUT	A	2	SO2	0.0674141	0.0674141	0.0674141	0.0673955
AUT	A	3	CH4	0.0768306	0.0719151	0.0737078	0.0688287
AUT	A	3	CO2	1099.46	1029.12	1054.77	984.951	0.953416	1.34237
AUT	A	3	CO	0.346398	0.324236	0.332318	0.31032
AUT	A	3	NH3	0.0293372	0.0274602	0.0281447	0.0262817
AUT	A	3	NMVOC	0.0270811	0.0253485	0.0259804	0.0242606
AUT	A	3	NOx	0.731477	0.684678	0.701746	0.655293
AUT	A	3	PM10	0.0843692	0.0789713	0.0809399	0.0755821
AUT	A	3	PM2.5	0.0703851	0.065882	0.0675243	0.0630545
AUT	A	3	SO2	0.0660751	0.0618477	0.0633894	0.0591933
AUT	A	4	CH4	0.0711638	0.0627251	0.0634778	0.0575295
AUT	A	4	CO2	1018.37	897.609	908.379	823.259	0.741918	0.534316
AUT	A	4	CO	0.320848	0.282802	0.286195	0.259377
AUT	A	4	NH3	0.0271733	0.0239511	0.0242385	0.0219672
AUT	A	4	NMVOC	0.0250837	0.0221092	0.0223745	0.0202779
AUT	A	4	NOx	0.677525	0.597184	0.604349	0.547718
AUT	A	4	PM10	0.0781463	0.0688797	0.0697062	0.0631743
AUT	A	4	PM2.5	0.0651937	0.057463	0.0581525	0.0527033
AUT	A	4	SO2	0.0612015	0.0539442	0.0545915	0.049476
AUT	A	5	CH4	0.0654083	0.0602703	0.0615479	0.0575355
AUT	A	5	CO2	936.005	862.48	880.763	823.344	0.150709	0.10902
AUT	A	5	CO	0.294899	0.271734	0.277495	0.259404
AUT	A	5	NH3	0.0249756	0.0230137	0.0235016	0.0219695
AUT	A	5	NMVOC	0.023055	0.021244	0.0216943	0.02028
AUT	A	5	NOx	0.622729	0.573813	0.585976	0.547775
AUT	A	5	PM10	0.0718261	0.066184	0.067587	0.0631809
AUT	A	5	PM2.5	0.059921	0.0552141	0.0563845	0.0527087
AUT	A	5	SO2	0.0562517	0.0518331	0.0529318	0.0494811
AUT	A	6	CH4	0.0604892	0.0574517	0.0574586	0.0554493
AUT	A	6	CO2	865.612	822.144	822.243	793.49	0.279092	0.120605
AUT	A	6	CO	0.272721	0.259026	0.259057	0.249998
AUT	A	6	NH3	0.0230973	0.0219375	0.0219401	0.0211729
AUT	A	6	NMVOC	0.0213211	0.0202505	0.0202529	0.0195447
AUT	A	6	NOx	0.575896	0.546977	0.547043	0.527913
AUT	A	6	PM10	0.0664243	0.0630888	0.0630964	0.0608899
AUT	A	6	PM2.5	0.0554146	0.0526319	0.0526383	0.0507975
AUT	A	6	SO2	0.0520213	0.049409	0.049415	0.0476869
AUT	A	7	CH4	0.0589345	0.0575953	0.0578172	0.0539666
AUT	A	7	CO2	843.365	824.199	827.374	772.273	0.696155	0.567998
AUT	A	7	CO	0.265712	0.259674	0.260674	0.243314
AUT	A	7	NH3	0.0225037	0.0219923	0.022077	0.0206067
AUT	A	7	NMVOC	0.0207731	0.0203011	0.0203793	0.0190221
AUT	A	7	NOx	0.561095	0.548344	0.550457	0.513797
AUT	A	7	PM10	0.0647172	0.0632465	0.0634901	0.0592618
AUT	A	7	PM2.5	0.0539904	0.0527635	0.0529667	0.0494393
AUT	A	7	SO2	0.0506843	0.0495325	0.0497233	0.0464118
AUT	A	8	CH4	0.0635914	0.061927	0.0635792	0.0569159
AUT	A	8	CO2	910.005	886.187	909.831	814.478	0.889539	0.513674
AUT	A	8	CO	0.286708	0.279204	0.286653	0.256611
AUT	A	8	NH3	0.0242819	0.0236463	0.0242772	0.0217329
AUT	A	8	NMVOC	0.0224146	0.0218279	0.0224103	0.0200616
AUT	A	8	NOx	0.605431	0.589585	0.605315	0.541877
AUT	A	8	PM10	0.0698309	0.0680032	0.0698176	0.0625005
AUT	A	8	PM2.5	0.0582566	0.0567318	0.0582454	0.0521411
AUT	A	8	SO2	0.0546892	0.0532578	0.0546787	0.0489483
AUT	A	9	CH4	0.0676056	0.0666705	0.0674123	0.0621938
AUT	A	9	CO2	967.448	954.068	964.683	890.005	1.20518	0.507246
AUT	A	9	CO	0.304806	0.30059	0.303935	0.280406
AUT	A	9	NH3	0.0258146	0.0254576	0.0257408	0.0237482
AUT	A	9	NMVOC	0.0238295	0.0234999	0.0237614	0.0219219
AUT	A	9	NOx	0.643649	0.634747	0.641809	0.592125
AUT	A	9	PM10	0.074239	0.0732122	0.0740268	0.0682962
AUT	A	9	PM2.5	0.061934	0.0610774	0.061757	0.0569762
AUT	A	9	SO2	0.0581414	0.0573373	0.0579752	0.0534873
AUT	A	10	CH4	0.073172	0.0742302	0.0746122	0.0676012
AUT	A	10	CO2	1047.11	1062.25	1067.71	967.385	1.71539	1.03298
AUT	A	10	CO	0.329903	0.334674	0.336396	0.304786
AUT	A	10	NH3	0.0279401	0.0283442	0.0284901	0.025813
AUT	A	10	NMVOC	0.0257915	0.0261645	0.0262992	0.0238279
AUT	A	10	NOx	0.696645	0.70672	0.710357	0.643607
AUT	A	10	PM10	0.0803516	0.0815137	0.0819331	0.0742341
AUT	A	10	PM2.5	0.0670335	0.0680029	0.0683528	0.0619299
AUT	A	10	SO2	0.0629286	0.0638387	0.0641672	0.0581376
AUT	A	11	CH4	0.0759677	0.0698326	0.0752668	0.0664544
AUT	A	11	CO2	1087.11	999.317	1077.08	950.975	1.75998	1.53018
AUT	A	11	CO	0.342507	0.314847	0.339347	0.299616
AUT	A	11	NH3	0.0290076	0.026665	0.02874	0.0253751
AUT	A	11	NMVOC	0.0267769	0.0246144	0.0265299	0.0234237
AUT	A	11	NOx	0.723261	0.664851	0.716588	0.632689
AUT	A	11	PM10	0.0834216	0.0766845	0.0826519	0.0729749
AUT	A	11	PM2.5	0.0695946	0.0639742	0.0689525	0.0608794
AUT	A	11	SO2	0.0653329	0.0600567	0.0647302	0.0571514
AUT	A	12	CH4	0.0847184	0.0812237	0.0847245	0.0719678
AUT	A	12	CO2	1212.34	1162.33	1212.42	1029.87	1.77009	1.90781
AUT	A	12	CO	0.381961	0.366205	0.381988	0.324474
AUT	A	12	NH3	0.032349	0.0310146	0.0323514	0.0274803
AUT	A	12	NMVOC	0.0298614	0.0286296	0.0298635	0.0253671
AUT	A	12	NOx	0.806574	0.773302	0.806632	0.68518
AUT	A	12	PM10	0.0930309	0.0891933	0.0930376	0.0790292
AUT	A	12	PM2.5	0.0776112	0.0744096	0.0776168	0.0659303
AUT	A	12	SO2	0.0728587	0.0698531	0.0728639	0.061893
AUT	B	1	CH4	0.251838	0.251838	0.251838	0.251838
AUT	B	1	CO2	2971.03	2971.03	2971.03	2971.03	1.55411	1.48247
AUT	B	1	CO	15.3129	15.3129	15.3129	15.3129
AUT	B	1	NH3	0.0520778	0.0520778	0.0520778	0.0520778
AUT	B	1	NMVOC	0.39421	0.39421	0.39421	0.39421
AUT	B	1	NOx	1.93788	1.93788	1.93788	1.93788
AUT	B	1	PM10	0.746754	0.746754	0.746754	0.746754
AUT	B	1	PM2.5	0.187671	0.187671	0.187671	0.187671
AUT	B	1	SO2	0.793964	0.793964	0.793964	0.793964
AUT	B	2	CH4	0.226892	0.226892	0.226892	0.225852
AUT	B	2	CO2	2676.73	2676.73	2676.73	2664.46	1.58627	1.54826
AUT	B	2	CO	13.796	13.796	13.796	13.7328
AUT	B	2	NH3	0.0469191	0.0469191	0.0469191	0.0467041
AUT	B	2	NMVOC	0.355161	0.355161	0.355161	0.353533
AUT	B	2	NOx	1.74592	1.74592	1.74592	1.73792
AUT	B	2	PM10	0.672782	0.672782	0.672782	0.669699
AUT	B	2	PM2.5	0.169081	0.169081	0.169081	0.168306
AUT	B	2	SO2	0.715316	0.715316	0.715316	0.712037
AUT	B	3	CH4	0.238237	0.241871	0.18252	0.171193
AUT	B	3	CO2	2810.57	2649.32	2153.26	2019.63	1.78364	1.63452
AUT	B	3	CO	14.4858	13.5655	11.098	10.4093
AUT	B	3	NH3	0.0492651	0.047318	0.0377435	0.0354011
AUT	B	3	NMVOC	0.372919	0.378625	0.285704	0.267973
AUT	B	3	NOx	1.83322	1.72819	1.40448	1.31732
AUT	B	3	PM10	0.706421	0.660077	0.541211	0.507623
AUT	B	3	PM2.5	0.177535	0.167991	0.136015	0.127574
AUT	B	3	SO2	0.751082	0.705939	0.575426	0.539716
AUT	B	4	CH4	0.221029	0.202578	0.111064	0.107617
AUT	B	4	CO2	2607.57	2025.55	1310.27	1269.6	1.65498	1.2427
AUT	B	4	CO	13.4396	10.2673	6.7532	6.54357
AUT	B	4	NH3	0.0457067	0.0371145	0.0229671	0.0222541
AUT	B	4	NMVOC	0.345983	0.317009	0.173852	0.168455
AUT	B	4	NOx	1.70081	1.32079	0.854635	0.828105
AUT	B	4	PM10	0.655398	0.498107	0.329329	0.319106
AUT	B	4	PM2.5	0.164712	0.128976	0.0827657	0.0801965
AUT	B	4	SO2	0.696832	0.53754	0.350149	0.33928
AUT	B	5	CH4	0.213598	0.197903	0.146194	0.144724
AUT	B	5	CO2	2519.9	2078.68	1724.7	1707.37	1.69592	1.31141
AUT	B	5	CO	12.9877	10.531	8.88923	8.79988
AUT	B	5	NH3	0.0441701	0.0377528	0.0302315	0.0299276
AUT	B	5	NMVOC	0.334351	0.309152	0.228841	0.226541
AUT	B	5	NOx	1.64363	1.35247	1.12495	1.11365
AUT	B	5	PM10	0.633363	0.511824	0.433495	0.429138
AUT	B	5	PM2.5	0.159174	0.131482	0.108944	0.107849
AUT	B	5	SO2	0.673404	0.5524	0.460901	0.456268
AUT	B	6	CH4	0.198926	0.187294	0.157278	0.155238
AUT	B	6	CO2	2346.81	1984.66	1855.47	1831.4	1.59504	1.51317
AUT	B	6	CO	12.0956	10.1325	9.56319	9.43913
AUT	B	6	NH3	0.0411361	0.0357516	0.0325236	0.0321016
AUT	B	6	NMVOC	0.311385	0.293211	0.246191	0.242998
AUT	B	6	NOx	1.53073	1.29477	1.21025	1.19455
AUT	B	6	PM10	0.589858	0.492513	0.466362	0.460312
AUT	B	6	PM2.5	0.148241	0.126088	0.117204	0.115684
AUT	B	6	SO2	0.627149	0.528124	0.495845	0.489413
AUT	B	7	CH4	0.212918	0.217826	0.170255	0.1647
AUT	B	7	CO2	2511.87	2245.19	2008.57	1943.02	1.712	1.62136
AUT	B	7	CO	12.9464	11.2679	10.3523	10.0145
AUT	B	7	NH3	0.0440294	0.041243	0.0352072	0.0340583
AUT	B	7	NMVOC	0.333286	0.339497	0.266505	0.257809
AUT	B	7	NOx	1.63839	1.45653	1.31011	1.26736
AUT	B	7	PM10	0.631346	0.547392	0.504842	0.488369
AUT	B	7	PM2.5	0.158668	0.141403	0.126875	0.122735
AUT	B	7	SO2	0.67126	0.595532	0.536759	0.519244
AUT	B	8	CH4	0.213598	0.214926	0.155257	0.152831
AUT	B	8	CO2	2519.9	2307.96	1831.63	1803.01	1.41814	1.35235
AUT	B	8	CO	12.9877	11.749	9.44034	9.29283
AUT	B	8	NH3	0.0441701	0.0415773	0.0321058	0.0316041
AUT	B	8	NMVOC	0.334351	0.336015	0.243029	0.239231
AUT	B	8	NOx	1.64363	1.5032	1.1947	1.17603
AUT	B	8	PM10	0.633363	0.57139	0.460371	0.453177
AUT	B	8	PM2.5	0.159174	0.146086	0.115699	0.113891
AUT	B	8	SO2	0.673404	0.614134	0.489475	0.481827
AUT	B	9	CH4	0.214398	0.218685	0.171633	0.170061
AUT	B	9	CO2	2529.34	2351.73	2024.81	2006.27	1.70908	1.72077
AUT	B	9	CO	13.0364	12.1105	10.436	10.3404
AUT	B	9	NH3	0.0443355	0.0419354	0.035492	0.035167
AUT	B	9	NMVOC	0.335604	0.343158	0.268661	0.266201
AUT	B	9	NOx	1.64978	1.53861	1.3207	1.30861
AUT	B	9	PM10	0.635736	0.588826	0.508926	0.504266
AUT	B	9	PM2.5	0.159771	0.150062	0.127901	0.12673
AUT	B	9	SO2	0.675927	0.626833	0.541101	0.536146
AUT	B	10	CH4	0.226892	0.234142	0.189016	0.183114
AUT	B	10	CO2	2676.73	2507.51	2229.89	2160.26	1.80557	1.69446
AUT	B	10	CO	13.796	12.843	11.493	11.1341
AUT	B	10	NH3	0.0469191	0.0449584	0.0390866	0.0378662
AUT	B	10	NMVOC	0.355161	0.366811	0.295871	0.286633
AUT	B	10	NOx	1.74592	1.63727	1.45447	1.40905
AUT	B	10	PM10	0.672782	0.624437	0.560471	0.542971
AUT	B	10	PM2.5	0.169081	0.159463	0.140855	0.136457
AUT	B	10	SO2	0.715316	0.667761	0.595904	0.577297
AUT	B	11	CH4	0.224452	0.232905	0.157775	0.152346
AUT	B	11	CO2	2647.94	2592.89	1861.33	1797.29	1.67399	1.72662
AUT	B	11	CO	13.6477	13.514	9.59339	9.26333
AUT	B	11	NH3	0.0464145	0.0454582	0.0326263	0.0315038
AUT	B	11	NMVOC	0.35134	0.366598	0.246969	0.238472
AUT	B	11	NOx	1.72714	1.70231	1.21407	1.1723
AUT	B	11	PM10	0.665546	0.657615	0.467835	0.451739
AUT	B	11	PM2.5	0.167262	0.166205	0.117574	0.113529
AUT	B	11	SO2	0.707622	0.692967	0.497411	0.480298
AUT	B	12	CH4	0.240391	0.24867	0.151313	0.144539
AUT	B	12	CO2	2835.99	2696.98	1785.1	1705.19	1.55995	1.60089
AUT	B	12	CO	14.6169	13.9776	9.2005	8.78864
AUT	B	12	NH3	0.0497106	0.0477476	0.0312901	0.0298894
AUT	B	12	NMVOC	0.376291	0.390939	0.236854	0.226252
AUT	B	12	NOx	1.8498	1.7684	1.16435	1.11222
AUT	B	12	PM10	0.71281	0.679689	0.448675	0.42859
AUT	B	12	PM2.5	0.179141	0.172708	0.112759	0.107712
AUT	B	12	SO2	0.757874	0.719687	0.47704	0.455685
AUT	C	1	CH4	1.59587	1.59587	1.59587	1.59587
AUT	C	1	CO2	2409.4	2409.4	2409.4	2409.4	1.49483	1.38153
AUT	C	1	CO	33.6383	33.6383	33.6383	33.6383
AUT	C	1	NH3	0.0871442	0.0871442	0.0871442	0.0871442
AUT	C	1	NMVOC	3.71622	3.71622	3.71622	3.71622
AUT	C	1	NOx	1.767	1.767	1.767	1.767
AUT	C	1	PM10	1.05047	1.05047	1.05047	1.05047
AUT	C	1	PM2.5	0.991348	0.991348	0.991348	0.991348
AUT	C	1	SO2	0.114824	0.114824	0.114824	0.114824
AUT	C	2	CH4	1.29814	1.29814	1.29814	1.29765
AUT	C	2	CO2	1959.89	1959.89	1959.89	1962.87	1.12672	1.05813
AUT	C	2	CO	27.3626	27.3626	27.3626	27.3456
AUT	C	2	NH3	0.0708863	0.0708863	0.0708863	0.0709522
AUT	C	2	NMVOC	3.02291	3.02291	3.02291	3.02169
AUT	C	2	NOx	1.43735	1.43735	1.43735	1.43931
AUT	C	2	PM10	0.854494	0.854494	0.854494	0.854625
AUT	C	2	PM2.5	0.806399	0.806399	0.806399	0.806525
AUT	C	2	SO2	0.0934019	0.0934019	0.0934019	0.0935844
AUT	C	3	CH4	1.20943	1.24379	1.2939	1.31312
AUT	C	3	CO2	1825.97	1854.66	1921.45	1944.89	0.97298	1.06549
AUT	C	3	CO	25.4928	26.3991	27.6904	28.1885
AUT	C	3	NH3	0.0660424	0.0674158	0.0700478	0.0710024
AUT	C	3	NMVOC	2.81635	2.90972	3.04671	3.09918
AUT	C	3	NOx	1.33913	1.36234	1.41307	1.43105
AUT	C	3	PM10	0.796103	0.818339	0.854073	0.867491
AUT	C	3	PM2.5	0.751295	0.772347	0.806188	0.818894
AUT	C	3	SO2	0.0870195	0.0879317	0.0907003	0.0916365
AUT	C	4	CH4	0.906293	0.944005	1.02635	1.028
AUT	C	4	CO2	1368.3	1397.16	1501.49	1504.04	0.717583	0.656967
AUT	C	4	CO	19.1032	20.101	22.2298	22.2718
AUT	C	4	NH3	0.0494892	0.0509302	0.0551186	0.055214
AUT	C	4	NMVOC	2.11044	2.21284	2.43778	2.44229
AUT	C	4	NOx	1.00348	1.02718	1.10687	1.10878
AUT	C	4	PM10	0.596563	0.620619	0.678624	0.679845
AUT	C	4	PM2.5	0.562986	0.58576	0.64069	0.641846
AUT	C	4	SO2	0.0652084	0.066058	0.0702948	0.0704059
AUT	C	5	CH4	0.645343	0.659058	0.690932	0.690504
AUT	C	5	CO2	974.321	983.422	1026.14	1024.21	0.66776	0.564536
AUT	C	5	CO	13.6028	13.9673	14.7885	14.7791
AUT	C	5	NH3	0.0352397	0.0357286	0.0374087	0.037352
AUT	C	5	NMVOC	1.50278	1.53997	1.62712	1.62591
AUT	C	5	NOx	0.714547	0.722224	0.75465	0.753298
AUT	C	5	PM10	0.424794	0.433358	0.45612	0.455634
AUT	C	5	PM2.5	0.400885	0.408992	0.430548	0.430088
AUT	C	5	SO2	0.0464329	0.0466614	0.048436	0.048334
AUT	C	6	CH4	0.362517	0.36539	0.373172	0.372137
AUT	C	6	CO2	547.318	547.134	559.668	556.277	0.17439	0.30059
AUT	C	6	CO	7.64126	7.72017	7.91811	7.89387
AUT	C	6	NH3	0.0197957	0.0198454	0.0203086	0.0202035
AUT	C	6	NMVOC	0.844177	0.8519	0.873245	0.870349
AUT	C	6	NOx	0.401392	0.401587	0.410926	0.408518
AUT	C	6	PM10	0.238625	0.240142	0.245978	0.244973
AUT	C	6	PM2.5	0.225194	0.226629	0.232157	0.231205
AUT	C	6	SO2	0.0260834	0.0260107	0.0265652	0.0263921
AUT	C	7	CH4	0.187749	0.188076	0.189256	0.188922
AUT	C	7	CO2	283.459	282.248	286.17	284.183	0.201315	0.227094
AUT	C	7	CO	3.95745	3.96787	3.99542	3.98869
AUT	C	7	NH3	0.0102523	0.0102279	0.0103491	0.0102927
AUT	C	7	NMVOC	0.437203	0.438043	0.441344	0.440382
AUT	C	7	NOx	0.207883	0.207101	0.209883	0.208503
AUT	C	7	PM10	0.123585	0.1236	0.124753	0.12431
AUT	C	7	PM2.5	0.116629	0.116643	0.117735	0.117316
AUT	C	7	SO2	0.0135087	0.0134318	0.0136325	0.0135251
AUT	C	8	CH4	0.368768	0.369253	0.371778	0.371351
AUT	C	8	CO2	556.755	553.604	561.084	558.867	0.196032	0.206626
AUT	C	8	CO	7.77301	7.79012	7.8502	7.84121
AUT	C	8	NH3	0.020137	0.0200667	0.0203031	0.0202391
AUT	C	8	NMVOC	0.858731	0.859935	0.866971	0.865751
AUT	C	8	NOx	0.408313	0.406237	0.411574	0.410028
AUT	C	8	PM10	0.24274	0.242582	0.244928	0.244405
AUT	C	8	PM2.5	0.229077	0.228927	0.23115	0.230654
AUT	C	8	SO2	0.0265331	0.026341	0.0267176	0.026599
AUT	C	9	CH4	0.634405	0.634128	0.632985	0.63444
AUT	C	9	CO2	957.807	950.942	950.496	951.983	0.400423	0.3836
AUT	C	9	CO	13.3722	13.3729	13.3421	13.3802
AUT	C	9	NH3	0.0346424	0.034464	0.0344312	0.0344962
AUT	C	9	NMVOC	1.47731	1.47634	1.47325	1.47721
AUT	C	9	NOx	0.702436	0.697764	0.697335	0.698503
AUT	C	9	PM10	0.417594	0.416535	0.415863	0.416841
AUT	C	9	PM2.5	0.39409	0.393085	0.392449	0.393375
AUT	C	9	SO2	0.0456459	0.0452561	0.0452551	0.0453094
AUT	C	10	CH4	0.97685	0.98433	1.00014	1.00143
AUT	C	10	CO2	1474.82	1473.56	1496.42	1492.66	0.677518	0.777994
AUT	C	10	CO	20.5904	20.7967	21.2021	21.2419
AUT	C	10	NH3	0.053342	0.0534517	0.0543272	0.0542568
AUT	C	10	NMVOC	2.27474	2.29482	2.33811	2.34145
AUT	C	10	NOx	1.0816	1.08158	1.09879	1.0964
AUT	C	10	PM10	0.643007	0.646852	0.658365	0.658557
AUT	C	10	PM2.5	0.606815	0.610453	0.621357	0.621536
AUT	C	10	SO2	0.070285	0.070051	0.0710272	0.0707829
AUT	C	11	CH4	1.25703	1.28945	1.35285	1.35902
AUT	C	11	CO2	1897.83	1918.3	1995.58	1998.3	0.988404	1.07202
AUT	C	11	CO	26.4961	27.3591	29.0018	29.1675
AUT	C	11	NH3	0.0686416	0.0697708	0.0729187	0.073104
AUT	C	11	NMVOC	2.92719	3.01506	3.18815	3.20484
AUT	C	11	NOx	1.39183	1.40927	1.46856	1.47109
AUT	C	11	PM10	0.827435	0.847537	0.891793	0.895463
AUT	C	11	PM2.5	0.780863	0.799892	0.841801	0.845275
AUT	C	11	SO2	0.0904442	0.0909243	0.0940104	0.094034
AUT	C	12	CH4	1.54893	1.59424	1.68746	1.69088
AUT	C	12	CO2	2338.53	2371.75	2489.66	2490.28	1.27242	1.32511
AUT	C	12	CO	32.6489	33.8495	36.2598	36.3527
AUT	C	12	NH3	0.0845812	0.0862757	0.0910122	0.0910926
AUT	C	12	NMVOC	3.60692	3.7299	3.98455	3.99377
AUT	C	12	NOx	1.71503	1.74252	1.8326	1.8334
AUT	C	12	PM10	1.01958	1.04829	1.11393	1.11584
AUT	C	12	PM2.5	0.962191	0.989369	1.05153	1.05334
AUT	C	12	SO2	0.111447	0.112383	0.117168	0.11713
AUT	D	1	CH4	0.932099	0.932099	0.932099	0.932099
AUT	D	1	CO2	12.9334	12.9334	12.9334	12.9334
AUT	D	1	CO	0	0	0	0
AUT	D	1	NH3	5.11041e-05	5.11041e-05	5.11041e-05	5.11041e-05
AUT	D	1	NMVOC	0.206057	0.206057	0.206057	0.206057
AUT	D	1	NOx	0	0	0	0
AUT	D	1	PM10	0.0170522	0.0170522	0.0170522	0.0170522
AUT	D	1	PM2.5	0.00538367	0.00538367	0.00538367	0.00538367
AUT	D	1	SO2	0.0023377	0.0023377	0.0023377	0.0023377
AUT	D	2	CH4	0.871964	0.871964	0.871964	0.871964
AUT	D	2	CO2	12.099	12.099	12.099	12.099
AUT	D	2	CO	0	0	0	0
AUT	D	2	NH3	4.78071e-05	4.78071e-05	4.78071e-05	4.78071e-05
AUT	D	2	NMVOC	0.192763	0.192763	0.192763	0.192763
AUT	D	2	NOx	0	0	0	0
AUT	D	2	PM10	0.0159521	0.0159521	0.0159521	0.0159521
AUT	D	2	PM2.5	0.00503634	0.00503634	0.00503634	0.00503634
AUT	D	2	SO2	0.00218689	0.00218689	0.00218689	0.00218689
AUT	D	3	CH4	0.932099	0.932099	0.932099	0.932099
AUT	D	3	CO2	12.9334	12.9334	12.9334	12.9334
AUT	D	3	CO	0	0	0	0
AUT	D	3	NH3	5.11041e-05	5.11041e-05	5.11041e-05	5.11041e-05
AUT	D	3	NMVOC	0.206057	0.176092	0.206057	0.206057
AUT	D	3	NOx	0	0	0	0
AUT	D	3	PM10	0.0170522	0.016095	0.0170522	0.0170522
AUT	D	3	PM2.5	0.00538367	0.00508147	0.00538367	0.00538367
AUT	D	3	SO2	0.0023377	0.0023377	0.0023377	0.0023377
AUT	D	4	CH4	0.601354	0.601354	0.601354	0.601354
AUT	D	4	CO2	8.34411	8.34411	8.34411	8.34411
AUT	D	4	CO	0	0	0	0
AUT	D	4	NH3	3.29704e-05	3.29704e-05	3.29704e-05	3.29704e-05
AUT	D	4	NMVOC	0.13294	0.100255	0.13294	0.13294
AUT	D	4	NOx	0	0	0	0
AUT	D	4	PM10	0.0110014	0.00774334	0.0110014	0.0110014
AUT	D	4	PM2.5	0.00347334	0.00244471	0.00347334	0.00347334
AUT	D	4	SO2	0.0015082	0.0015082	0.0015082	0.0015082
AUT	D	5	CH4	0.621399	0.621399	0.621399	0.621399
AUT	D	5	CO2	8.62224	8.62224	8.62224	8.62224
AUT	D	5	CO	0	0	0	0
AUT	D	5	NH3	3.40694e-05	3.40694e-05	3.40694e-05	3.40694e-05
AUT	D	5	NMVOC	0.137371	0.11856	0.137371	0.137371
AUT	D	5	NOx	0	0	0	0
AUT	D	5	PM10	0.0113681	0.00741754	0.0113681	0.0113681
AUT	D	5	PM2.5	0.00358911	0.00234185	0.00358911	0.00358911
AUT	D	5	SO2	0.00155847	0.00155847	0.00155847	0.00155847
AUT	D	6	CH4	0.601354	0.601354	0.601354	0.601354
AUT	D	6	CO2	8.34411	8.34411	8.34411	8.34411
AUT	D	6	CO	0	0	0	0
AUT	D	6	NH3	3.29704e-05	3.29704e-05	3.29704e-05	3.29704e-05
AUT	D	6	NMVOC	0.13294	0.11946	0.13294	0.13294
AUT	D	6	NOx	0	0	0	0
AUT	D	6	PM10	0.0110014	0.00838662	0.0110014	0.0110014
AUT	D	6	PM2.5	0.00347334	0.0026478	0.00347334	0.00347334
AUT	D	6	SO2	0.0015082	0.0015082	0.0015082	0.0015082
AUT	D	7	CH4	0.621399	0.621399	0.621399	0.621399
AUT	D	7	CO2	8.62224	8.62224	8.62224	8.62224
AUT	D	7	CO	0	0	0	0
AUT	D	7	NH3	3.40694e-05	3.40694e-05	3.40694e-05	3.40694e-05
AUT	D	7	NMVOC	0.137371	0.133765	0.137371	0.137371
AUT	D	7	NOx	0	0	0	0
AUT	D	7	PM10	0.0113681	0.00928445	0.0113681	0.0113681
AUT	D	7	PM2.5	0.00358911	0.00293126	0.00358911	0.00358911
AUT	D	7	SO2	0.00155847	0.00155847	0.00155847	0.00155847
AUT	D	8	CH4	0.621399	0.621399	0.621399	0.621399
AUT	D	8	CO2	8.62224	8.62224	8.62224	8.62224
AUT	D	8	CO	0	0	0	0
AUT	D	8	NH3	3.40694e-05	3.40694e-05	3.40694e-05	3.40694e-05
AUT	D	8	NMVOC	0.137371	0.130251	0.137371	0.137371
AUT	D	8	NOx	0	0	0	0
AUT	D	8	PM10	0.0113681	0.0100332	0.0113681	0.0113681
AUT	D	8	PM2.5	0.00358911	0.00316765	0.00358911	0.00358911
AUT	D	8	SO2	0.00155847	0.00155847	0.00155847	0.00155847
AUT	D	9	CH4	0.601354	0.601354	0.601354	0.601354
AUT	D	9	CO2	8.34411	8.34411	8.34411	8.34411
AUT	D	9	CO	0	0	0	0
AUT	D	9	NH3	3.29704e-05	3.29704e-05	3.29704e-05	3.29704e-05
AUT	D	9	NMVOC	0.13294	0.122999	0.13294	0.13294
AUT	D	9	NOx	0	0	0	0
AUT	D	9	PM10	0.0110014	0.0102008	0.0110014	0.0110014
AUT	D	9	PM2.5	0.00347334	0.00322058	0.00347334	0.00347334
AUT	D	9	SO2	0.0015082	0.0015082	0.0015082	0.0015082
AUT	D	10	CH4	0.932099	0.932099	0.932099	0.932099
AUT	D	10	CO2	12.9334	12.9334	12.9334	12.9334
AUT	D	10	CO	0	0	0	0
AUT	D	10	NH3	5.11041e-05	5.11041e-05	5.11041e-05	5.11041e-05
AUT	D	10	NMVOC	0.206057	0.188271	0.206057	0.206057
AUT	D	10	NOx	0	0	0	0
AUT	D	10	PM10	0.0170522	0.0174702	0.0170522	0.0170522
AUT	D	10	PM2.5	0.00538367	0.00551563	0.00538367	0.00538367
AUT	D	10	SO2	0.0023377	0.0023377	0.0023377	0.0023377
AUT	D	11	CH4	0.902031	0.902031	0.902031	0.902031
AUT	D	11	CO2	12.5162	12.5162	12.5162	12.5162
AUT	D	11	CO	0	0	0	0
AUT	D	11	NH3	4.94556e-05	4.94556e-05	4.94556e-05	4.94556e-05
AUT	D	11	NMVOC	0.19941	0.167585	0.19941	0.19941
AUT	D	11	NOx	0	0	0	0
AUT	D	11	PM10	0.0165021	0.0173232	0.0165021	0.0165021
AUT	D	11	PM2.5	0.00521	0.00546925	0.00521	0.00521
AUT	D	11	SO2	0.0022623	0.0022623	0.0022623	0.0022623
AUT	D	12	CH4	0.932099	0.932099	0.932099	0.932099
AUT	D	12	CO2	12.9334	12.9334	12.9334	12.9334
AUT	D	12	CO	0	0	0	0
AUT	D	12	NH3	5.11041e-05	5.11041e-05	5.11041e-05	5.11041e-05
AUT	D	12	NMVOC	0.206057	0.175036	0.206057	0.206057
AUT	D	12	NOx	0	0	0	0
AUT	D	12	PM10	0.0170522	0.0177435	0.0170522	0.0170522
AUT	D	12	PM2.5	0.00538367	0.00560193	0.00538367	0.00538367
AUT	D	12	SO2	0.0023377	0.0023377	0.0023377	0.0023377
AUT	E	1	CH4	0	0	0	0
AUT	E	1	CO2	11.595	11.595	11.595	11.595
AUT	E	1	CO	0.0595969	0.0595969	0.0595969	0.0595969
AUT	E	1	NH3	0.00460576	0.00460576	0.00460576	0.00460576
AUT	E	1	NMVOC	2.47204	2.47204	2.47204	2.47204
AUT	E	1	NOx	0.0019492	0.0019492	0.0019492	0.0019492
AUT	E	1	PM10	0.0375848	0.0375848	0.0375848	0.0375848
AUT	E	1	PM2.5	0.033414	0.033414	0.033414	0.033414
AUT	E	1	SO2	0.000262521	0.000262521	0.000262521	0.000262521
AUT	E	2	CH4	0	0	0	0
AUT	E	2	CO2	10.5676	10.5676	10.5676	10.5676
AUT	E	2	CO	0.0543161	0.0543161	0.0543161	0.0543161
AUT	E	2	NH3	0.00419766	0.00419766	0.00419766	0.00419766
AUT	E	2	NMVOC	2.253	2.253	2.253	2.253
AUT	E	2	NOx	0.00177649	0.00177649	0.00177649	0.00177649
AUT	E	2	PM10	0.0342545	0.0342545	0.0342545	0.0342545
AUT	E	2	PM2.5	0.0304533	0.0304533	0.0304533	0.0304533
AUT	E	2	SO2	0.00023926	0.00023926	0.00023926	0.00023926
AUT	E	3	CH4	0	0	0	0
AUT	E	3	CO2	12.1736	12.1736	12.1736	12.1736
AUT	E	3	CO	0.0625707	0.0625707	0.0625707	0.0625707
AUT	E	3	NH3	0.00483559	0.00483559	0.00483559	0.00483559
AUT	E	3	NMVOC	2.59539	2.56392	2.59539	2.59539
AUT	E	3	NOx	0.00204646	0.00204646	0.00204646	0.00204646
AUT	E	3	PM10	0.0394603	0.0394603	0.0394603	0.0394603
AUT	E	3	PM2.5	0.0350814	0.0350814	0.0350814	0.0350814
AUT	E	3	SO2	0.000275621	0.000275621	0.000275621	0.000275621
AUT	E	4	CH4	0	0	0	0
AUT	E	4	CO2	11.7418	11.7418	11.7418	11.7418
AUT	E	4	CO	0.0603512	0.0603512	0.0603512	0.0603512
AUT	E	4	NH3	0.00466406	0.00466406	0.00466406	0.00466406
AUT	E	4	NMVOC	2.50333	2.37414	2.50333	2.50333
AUT	E	4	NOx	0.00197387	0.00197387	0.00197387	0.00197387
AUT	E	4	PM10	0.0380605	0.0380605	0.0380605	0.0380605
AUT	E	4	PM2.5	0.033837	0.033837	0.033837	0.033837
AUT	E	4	SO2	0.000265844	0.000265844	0.000265844	0.000265844
AUT	E	5	CH4	0	0	0	0
AUT	E	5	CO2	11.7812	11.7812	11.7812	11.7812
AUT	E	5	CO	0.0605537	0.0605537	0.0605537	0.0605537
AUT	E	5	NH3	0.00467971	0.00467971	0.00467971	0.00467971
AUT	E	5	NMVOC	2.51173	2.41645	2.51173	2.51173
AUT	E	5	NOx	0.0019805	0.0019805	0.0019805	0.0019805
AUT	E	5	PM10	0.0381882	0.0381882	0.0381882	0.0381882
AUT	E	5	PM2.5	0.0339505	0.0339505	0.0339505	0.0339505
AUT	E	5	SO2	0.000266736	0.000266736	0.000266736	0.000266736
AUT	E	6	CH4	0	0	0	0
AUT	E	6	CO2	12.094	12.094	12.094	12.094
AUT	E	6	CO	0.0621618	0.0621618	0.0621618	0.0621618
AUT	E	6	NH3	0.00480399	0.00480399	0.00480399	0.00480399
AUT	E	6	NMVOC	2.57843	2.53295	2.57843	2.57843
AUT	E	6	NOx	0.00203309	0.00203309	0.00203309	0.00203309
AUT	E	6	PM10	0.0392023	0.0392023	0.0392023	0.0392023
AUT	E	6	PM2.5	0.0348521	0.0348521	0.0348521	0.0348521
AUT	E	6	SO2	0.000273819	0.000273819	0.000273819	0.000273819
AUT	E	7	CH4	0	0	0	0
AUT	E	7	CO2	12.5714	12.5714	12.5714	12.5714
AUT	E	7	CO	0.0646155	0.0646155	0.0646155	0.0646155
AUT	E	7	NH3	0.00499362	0.00499362	0.00499362	0.00499362
AUT	E	7	NMVOC	2.68021	2.65373	2.68021	2.68021
AUT	E	7	NOx	0.00211334	0.00211334	0.00211334	0.00211334
AUT	E	7	PM10	0.0407498	0.0407498	0.0407498	0.0407498
AUT	E	7	PM2.5	0.0362278	0.0362278	0.0362278	0.0362278
AUT	E	7	SO2	0.000284628	0.000284628	0.000284628	0.000284628
AUT	E	8	CH4	0	0	0	0
AUT	E	8	CO2	11.7812	11.7812	11.7812	11.7812
AUT	E	8	CO	0.0605537	0.0605537	0.0605537	0.0605537
AUT	E	8	NH3	0.00467971	0.00467971	0.00467971	0.00467971
AUT	E	8	NMVOC	2.51173	2.47982	2.51173	2.51173
AUT	E	8	NOx	0.0019805	0.0019805	0.0019805	0.0019805
AUT	E	8	PM10	0.0381882	0.0381882	0.0381882	0.0381882
AUT	E	8	PM2.5	0.0339505	0.0339505	0.0339505	0.0339505
AUT	E	8	SO2	0.000266736	0.000266736	0.000266736	0.000266736
AUT	E	9	CH4	0	0	0	0
AUT	E	9	CO2	12.2114	12.2114	12.2114	12.2114
AUT	E	9	CO	0.0627653	0.0627653	0.0627653	0.0627653
AUT	E	9	NH3	0.00485063	0.00485063	0.00485063	0.00485063
AUT	E	9	NMVOC	2.60346	2.55295	2.60346	2.60346
AUT	E	9	NOx	0.00205283	0.00205283	0.00205283	0.00205283
AUT	E	9	PM10	0.0395829	0.0395829	0.0395829	0.0395829
AUT	E	9	PM2.5	0.0351904	0.0351904	0.0351904	0.0351904
AUT	E	9	SO2	0.000276478	0.000276478	0.000276478	0.000276478
AUT	E	10	CH4	0	0	0	0
AUT	E	10	CO2	12.2929	12.2929	12.2929	12.2929
AUT	E	10	CO	0.0631842	0.0631842	0.0631842	0.0631842
AUT	E	10	NH3	0.004883	0.004883	0.004883	0.004883
AUT	E	10	NMVOC	2.62084	2.60249	2.62084	2.62084
AUT	E	10	NOx	0.00206653	0.00206653	0.00206653	0.00206653
AUT	E	10	PM10	0.0398471	0.0398471	0.0398471	0.0398471
AUT	E	10	PM2.5	0.0354253	0.0354253	0.0354253	0.0354253
AUT	E	10	SO2	0.000278323	0.000278323	0.000278323	0.000278323
AUT	E	11	CH4	0	0	0	0
AUT	E	11	CO2	11.5861	11.5861	11.5861	11.5861
AUT	E	11	CO	0.0595512	0.0595512	0.0595512	0.0595512
AUT	E	11	NH3	0.00460223	0.00460223	0.00460223	0.00460223
AUT	E	11	NMVOC	2.47014	2.43211	2.47014	2.47014
AUT	E	11	NOx	0.00194771	0.00194771	0.00194771	0.00194771
AUT	E	11	PM10	0.037556	0.037556	0.037556	0.037556
AUT	E	11	PM2.5	0.0333884	0.0333884	0.0333884	0.0333884
AUT	E	11	SO2	0.00026232	0.00026232	0.00026232	0.00026232
AUT	E	12	CH4	0	0	0	0
AUT	E	12	CO2	11.1068	11.1068	11.1068	11.1068
AUT	E	12	CO	0.0570875	0.0570875	0.0570875	0.0570875
AUT	E	12	NH3	0.00441184	0.00441184	0.00441184	0.00441184
AUT	E	12	NMVOC	2.36795	2.32591	2.36795	2.36795
AUT	E	12	NOx	0.00186713	0.00186713	0.00186713	0.00186713
AUT	E	12	PM10	0.0360023	0.0360023	0.0360023	0.0360023
AUT	E	12	PM2.5	0.0320071	0.0320071	0.0320071	0.0320071
AUT	E	12	SO2	0.000251467	0.000251467	0.000251467	0.000251467
AUT	F	1	CH4	0.0613619	0.0613619	0.0613619	0.0613619
AUT	F	1	CO2	1885.76	1885.76	1885.76	1885.76	1.98593	2.05391
AUT	F	1	CO	3.91307	3.91307	3.91307	3.91307
AUT	F	1	NH3	0.0681466	0.0681466	0.0681466	0.0681466
AUT	F	1	NMVOC	0.237303	0.237303	0.237303	0.237303
AUT	F	1	NOx	5.31421	5.31421	5.31421	5.31421
AUT	F	1	PM10	0.222105	0.222105	0.222105	0.222105
AUT	F	1	PM2.5	0.142924	0.142924	0.142924	0.142924
AUT	F	1	SO2	0.0108045	0.0108045	0.0108045	0.0108045
AUT	F	2	CH4	0.05901	0.05901	0.05901	0.060162
AUT	F	2	CO2	1813.48	1813.48	1813.48	1848.89	1.81527	1.9725
AUT	F	2	CO	3.76309	3.76309	3.76309	3.83655
AUT	F	2	NH3	0.0655346	0.0655346	0.0655346	0.066814
AUT	F	2	NMVOC	0.228207	0.228207	0.228207	0.232662
AUT	F	2	NOx	5.11052	5.11052	5.11052	5.21029
AUT	F	2	PM10	0.213592	0.213592	0.213592	0.217761
AUT	F	2	PM2.5	0.137446	0.137446	0.137446	0.14013
AUT	F	2	SO2	0.0103904	0.0103904	0.0103904	0.0105933
AUT	F	3	CH4	0.0673531	0.0395193	0.0488547	0.0421973
AUT	F	3	CO2	2069.88	1442.88	1501.39	1296.8	2.08109	1.81522
AUT	F	3	CO	4.29513	2.68996	3.11548	2.69094
AUT	F	3	NH3	0.0748002	0.0477893	0.0542564	0.046863
AUT	F	3	NMVOC	0.260472	0.158232	0.188934	0.163188
AUT	F	3	NOx	5.83306	3.63192	4.23102	3.65447
AUT	F	3	PM10	0.24379	0.167793	0.176833	0.152737
AUT	F	3	PM2.5	0.156879	0.106325	0.113792	0.0982861
AUT	F	3	SO2	0.0118595	0.00840115	0.00860228	0.00743006
AUT	F	4	CH4	0.0692072	0.0275101	0.031514	0.0272954
AUT	F	4	CO2	2126.86	1086.2	968.483	838.837	1.9973	1.64855
AUT	F	4	CO	4.41336	1.93333	2.00966	1.74064
AUT	F	4	NH3	0.0768593	0.0346636	0.0349985	0.0303134
AUT	F	4	NMVOC	0.267642	0.112082	0.121873	0.105558
AUT	F	4	NOx	5.99364	2.60322	2.72925	2.3639
AUT	F	4	PM10	0.250501	0.125666	0.114068	0.098798
AUT	F	4	PM2.5	0.161198	0.0791272	0.0734026	0.0635766
AUT	F	4	SO2	0.0121859	0.00636478	0.00554896	0.00480615
AUT	F	5	CH4	0.0718601	0.0475091	0.0467128	0.0428699
AUT	F	5	CO2	2208.39	1568.87	1435.57	1317.47	2.06732	1.90032
AUT	F	5	CO	4.58254	3.11059	2.97889	2.73383
AUT	F	5	NH3	0.0798055	0.0546207	0.0518778	0.0476099
AUT	F	5	NMVOC	0.277902	0.186304	0.180651	0.165789
AUT	F	5	NOx	6.22339	4.21427	4.04553	3.71272
AUT	F	5	PM10	0.260104	0.183757	0.169081	0.155171
AUT	F	5	PM2.5	0.167377	0.117461	0.108804	0.0998527
AUT	F	5	SO2	0.0126531	0.00905278	0.00822515	0.00754849
AUT	F	6	CH4	0.0709869	0.0564932	0.058168	0.0523431
AUT	F	6	CO2	2181.55	1849.35	1787.6	1608.59	1.9824	2.05749
AUT	F	6	CO	4.52686	3.68677	3.70939	3.33793
AUT	F	6	NH3	0.0788358	0.0646731	0.0645995	0.0581305
AUT	F	6	NMVOC	0.274525	0.221151	0.224951	0.202424
AUT	F	6	NOx	6.14777	4.99635	5.0376	4.53313
AUT	F	6	PM10	0.256943	0.216751	0.210544	0.18946
AUT	F	6	PM2.5	0.165343	0.138662	0.135485	0.121918
AUT	F	6	SO2	0.0124993	0.0106624	0.0102422	0.00921651
AUT	F	7	CH4	0.0704268	0.0607893	0.068324	0.0585724
AUT	F	7	CO2	2164.34	1915.19	2099.72	1800.03	2.06848	2.1784
AUT	F	7	CO	4.49114	3.91152	4.35704	3.73518
AUT	F	7	NH3	0.0782137	0.0683138	0.0758784	0.0650486
AUT	F	7	NMVOC	0.272359	0.2362	0.264226	0.226515
AUT	F	7	NOx	6.09926	5.30773	5.91715	5.07262
AUT	F	7	PM10	0.254916	0.225129	0.247304	0.212008
AUT	F	7	PM2.5	0.164038	0.144531	0.15914	0.136427
AUT	F	7	SO2	0.0124007	0.0110008	0.0120304	0.0103134
AUT	F	8	CH4	0.0695345	0.0597027	0.0691357	0.0578754
AUT	F	8	CO2	2136.92	1897.65	2124.66	1778.62	2.07102	2.15502
AUT	F	8	CO	4.43423	3.85401	4.4088	3.69074
AUT	F	8	NH3	0.0772227	0.0673778	0.0767798	0.0642746
AUT	F	8	NMVOC	0.268908	0.232373	0.267365	0.223819
AUT	F	8	NOx	6.02198	5.22816	5.98744	5.01226
AUT	F	8	PM10	0.251686	0.222913	0.250242	0.209485
AUT	F	8	PM2.5	0.16196	0.142991	0.161031	0.134804
AUT	F	8	SO2	0.0122436	0.0109096	0.0121733	0.0101906
AUT	F	9	CH4	0.0711285	0.0615606	0.0659595	0.060189
AUT	F	9	CO2	2185.91	1997.34	2027.05	1849.71	1.97883	2.14091
AUT	F	9	CO	4.53589	4.00415	4.20626	3.83827
AUT	F	9	NH3	0.0789931	0.0701685	0.0732525	0.0668439
AUT	F	9	NMVOC	0.275072	0.240565	0.255082	0.232766
AUT	F	9	NOx	6.16004	5.4281	5.71237	5.21262
AUT	F	9	PM10	0.257456	0.234253	0.238746	0.217859
AUT	F	9	PM2.5	0.165673	0.14998	0.153633	0.140192
AUT	F	9	SO2	0.0125242	0.0115058	0.0116141	0.010598
AUT	F	10	CH4	0.0725848	0.0571013	0.0618775	0.0558757
AUT	F	10	CO2	2230.66	1871.33	1901.61	1717.16	2.10848	2.1616
AUT	F	10	CO	4.62876	3.72799	3.94595	3.56321
AUT	F	10	NH3	0.0806103	0.0654046	0.0687192	0.0620537
AUT	F	10	NMVOC	0.280704	0.223581	0.239296	0.216086
AUT	F	10	NOx	6.28615	5.05203	5.35886	4.83907
AUT	F	10	PM10	0.262727	0.219308	0.223971	0.202247
AUT	F	10	PM2.5	0.169065	0.140284	0.144125	0.130146
AUT	F	10	SO2	0.0127807	0.0107903	0.0108953	0.00983853
AUT	F	11	CH4	0.0670314	0.0440362	0.0420749	0.0376622
AUT	F	11	CO2	2059.99	1603.76	1293.04	1157.43	2.09034	1.9621
AUT	F	11	CO	4.27461	2.99441	2.68313	2.40173
AUT	F	11	NH3	0.0744429	0.0531825	0.046727	0.0418264
AUT	F	11	NMVOC	0.259228	0.176222	0.162715	0.145649
AUT	F	11	NOx	5.8052	4.04334	3.64387	3.26171
AUT	F	11	PM10	0.242626	0.186534	0.152294	0.136321
AUT	F	11	PM2.5	0.15613	0.118226	0.098001	0.0877229
AUT	F	11	SO2	0.0118028	0.00933588	0.0074085	0.00663152
AUT	F	12	CH4	0.0646828	0.0432464	0.0388308	0.0354033
AUT	F	12	CO2	1987.82	1564.24	1193.34	1088.01	2.07665	2.01276
AUT	F	12	CO	4.12484	2.93271	2.47625	2.25768
AUT	F	12	NH3	0.0718346	0.0520449	0.0431242	0.0393178
AUT	F	12	NMVOC	0.250145	0.172807	0.150169	0.136914
AUT	F	12	NOx	5.60181	3.96096	3.36291	3.06608
AUT	F	12	PM10	0.234125	0.182022	0.140551	0.128145
AUT	F	12	PM2.5	0.150659	0.115433	0.0904447	0.0824615
AUT	F	12	SO2	0.0113893	0.00910047	0.00683728	0.00623377
AUT	H	1	CH4	0.000114029	0.000114029	0.000114029	0.000114029
AUT	H	1	CO2	28.5491	28.5491	28.5491	28.5491	0.274002	0.310372
AUT	H	1	CO	0.335719	0.335719	0.335719	0.335719
AUT	H	1	NH3	7.05115e-05	7.05115e-05	7.05115e-05	7.05115e-05
AUT	H	1	NMVOC	0.0174996	0.0174996	0.0174996	0.0174996
AUT	H	1	NOx	0.137139	0.137139	0.137139	0.137139
AUT	H	1	PM10	0.0103206	0.0103206	0.0103206	0.0103206
AUT	H	1	PM2.5	0.0103206	0.0103206	0.0103206	0.0103206
AUT	H	1	SO2	0.00818159	0.00818159	0.00818159	0.00818159
AUT	H	2	CH4	0.000106672	0.000106672	0.000104281	0.000106672
AUT	H	2	CO2	26.7072	26.7072	26.1086	26.7072	0.265307	0.293569
AUT	H	2	CO	0.31406	0.31406	0.307021	0.31406
AUT	H	2	NH3	6.59624e-05	6.59624e-05	6.44841e-05	6.59624e-05
AUT	H	2	NMVOC	0.0163706	0.0163706	0.0160037	0.0163706
AUT	H	2	NOx	0.128291	0.128291	0.125416	0.128291
AUT	H	2	PM10	0.00965472	0.00965472	0.00943834	0.00965472
AUT	H	2	PM2.5	0.00965472	0.00965472	0.00943834	0.00965472
AUT	H	2	SO2	0.00765374	0.00765374	0.00748221	0.00765374
AUT	H	3	CH4	0.000114029	5.88467e-05	8.19152e-05	5.75661e-05
AUT	H	3	CO2	28.5491	14.7333	20.5089	14.4127	0.319764	0.175113
AUT	H	3	CO	0.335719	0.173254	0.241172	0.169484
AUT	H	3	NH3	7.05115e-05	3.63889e-05	5.06536e-05	3.5597e-05
AUT	H	3	NMVOC	0.0174996	0.00903103	0.0125713	0.0088345
AUT	H	3	NOx	0.137139	0.0707732	0.0985169	0.069233
AUT	H	3	PM10	0.0103206	0.00532613	0.00741402	0.00521022
AUT	H	3	PM2.5	0.0103206	0.00532613	0.00741402	0.00521022
AUT	H	3	SO2	0.00818159	0.00422227	0.00587744	0.00413038
AUT	H	4	CH4	0.00011035	8.37124e-06	2.07827e-05	7.90844e-06
AUT	H	4	CO2	27.6281	2.09589	5.2033	1.98002	0.329659	0.0230737
AUT	H	4	CO	0.324889	0.0246463	0.0611875	0.0232837
AUT	H	4	NH3	6.8237e-05	5.1765e-06	1.28513e-05	4.89032e-06
AUT	H	4	NMVOC	0.0169351	0.00128471	0.00318945	0.00121368
AUT	H	4	NOx	0.132715	0.0100678	0.0249947	0.00951124
AUT	H	4	PM10	0.00998764	0.000757668	0.00188101	0.000715781
AUT	H	4	PM2.5	0.00998764	0.000757668	0.00188101	0.000715781
AUT	H	4	SO2	0.00791767	0.000600639	0.00149116	0.000567433
AUT	H	5	CH4	0.000114029	1.00123e-05	2.28501e-05	5.70143e-05
AUT	H	5	CO2	28.5491	2.50675	5.72092	14.2745	0.346977	0.0305447
AUT	H	5	CO	0.335719	0.0294778	0.0672744	0.16786
AUT	H	5	NH3	7.05115e-05	6.19126e-06	1.41297e-05	3.52558e-05
AUT	H	5	NMVOC	0.0174996	0.00153656	0.00350674	0.00874982
AUT	H	5	NOx	0.137139	0.0120415	0.0274811	0.0685694
AUT	H	5	PM10	0.0103206	0.000906197	0.00206813	0.00516028
AUT	H	5	PM2.5	0.0103206	0.000906197	0.00206813	0.00516028
AUT	H	5	SO2	0.00818159	0.000718384	0.0016395	0.00409079
AUT	H	6	CH4	0.00011035	1.80432e-05	2.28034e-05	5.51752e-05
AUT	H	6	CO2	27.6281	4.51743	5.70924	13.8141	0.367929	0.0436191
AUT	H	6	CO	0.324889	0.0531221	0.067137	0.162445
AUT	H	6	NH3	6.8237e-05	1.11573e-05	1.41009e-05	3.41185e-05
AUT	H	6	NMVOC	0.0169351	0.00276904	0.00349958	0.00846757
AUT	H	6	NOx	0.132715	0.0217	0.027425	0.0663575
AUT	H	6	PM10	0.00998764	0.00163306	0.0020639	0.00499382
AUT	H	6	PM2.5	0.00998764	0.00163306	0.0020639	0.00499382
AUT	H	6	SO2	0.00791767	0.0012946	0.00163615	0.00395883
AUT	H	7	CH4	0.000114029	4.2049e-05	7.31432e-05	5.70143e-05
AUT	H	7	CO2	28.5491	10.5277	18.3127	14.2745	0.376	0.113642
AUT	H	7	CO	0.335719	0.123799	0.215346	0.16786
AUT	H	7	NH3	7.05115e-05	2.60017e-05	4.52293e-05	3.52558e-05
AUT	H	7	NMVOC	0.0174996	0.00645313	0.0112251	0.00874982
AUT	H	7	NOx	0.137139	0.050571	0.0879671	0.0685694
AUT	H	7	PM10	0.0103206	0.00380579	0.00662008	0.00516028
AUT	H	7	PM2.5	0.0103206	0.00380579	0.00662008	0.00516028
AUT	H	7	SO2	0.00818159	0.00301702	0.00524804	0.00409079
AUT	H	8	CH4	0.000114029	5.35986e-05	8.63299e-05	5.70143e-05
AUT	H	8	CO2	28.5491	13.4193	21.6142	14.2745	0.37148	0.146662
AUT	H	8	CO	0.335719	0.157803	0.254169	0.16786
AUT	H	8	NH3	7.05115e-05	3.31436e-05	5.33835e-05	3.52558e-05
AUT	H	8	NMVOC	0.0174996	0.00822562	0.0132488	0.00874982
AUT	H	8	NOx	0.137139	0.0644614	0.103826	0.0685694
AUT	H	8	PM10	0.0103206	0.00485113	0.00781359	0.00516028
AUT	H	8	PM2.5	0.0103206	0.00485113	0.00781359	0.00516028
AUT	H	8	SO2	0.00818159	0.00384571	0.00619419	0.00409079
AUT	H	9	CH4	0.00011035	4.82758e-05	8.07781e-05	5.51752e-05
AUT	H	9	CO2	27.6281	12.0867	20.2242	13.8141	0.355876	0.13146
AUT	H	9	CO	0.324889	0.142132	0.237824	0.162445
AUT	H	9	NH3	6.8237e-05	2.98521e-05	4.99505e-05	3.41185e-05
AUT	H	9	NMVOC	0.0169351	0.00740874	0.0123968	0.00846757
AUT	H	9	NOx	0.132715	0.0580598	0.0971494	0.0663575
AUT	H	9	PM10	0.00998764	0.00436937	0.0073111	0.00499382
AUT	H	9	PM2.5	0.00998764	0.00436937	0.0073111	0.00499382
AUT	H	9	SO2	0.00791767	0.0034638	0.00579585	0.00395883
AUT	H	10	CH4	0.000114029	4.12673e-05	8.6226e-05	5.70143e-05
AUT	H	10	CO2	28.5491	10.332	21.5882	14.2745	0.343483	0.103476
AUT	H	10	CO	0.335719	0.121498	0.253863	0.16786
AUT	H	10	NH3	7.05115e-05	2.55183e-05	5.33193e-05	3.52558e-05
AUT	H	10	NMVOC	0.0174996	0.00633318	0.0132328	0.00874982
AUT	H	10	NOx	0.137139	0.049631	0.103701	0.0685694
AUT	H	10	PM10	0.0103206	0.00373504	0.00780418	0.00516028
AUT	H	10	PM2.5	0.0103206	0.00373504	0.00780418	0.00516028
AUT	H	10	SO2	0.00818159	0.00296094	0.00618674	0.00409079
AUT	H	11	CH4	0.00011035	2.81387e-05	7.6502e-05	5.51752e-05
AUT	H	11	CO2	27.6281	7.04502	19.1536	13.8141	0.294096	0.067276
AUT	H	11	CO	0.324889	0.0828451	0.225234	0.162445
AUT	H	11	NH3	6.8237e-05	1.74001e-05	4.73063e-05	3.41185e-05
AUT	H	11	NMVOC	0.0169351	0.00431837	0.0117405	0.00846757
AUT	H	11	NOx	0.132715	0.0338416	0.0920066	0.0663575
AUT	H	11	PM10	0.00998764	0.00254679	0.00692408	0.00499382
AUT	H	11	PM2.5	0.00998764	0.00254679	0.00692408	0.00499382
AUT	H	11	SO2	0.00791767	0.00201896	0.00548904	0.00395883
AUT	H	12	CH4	0.000114029	2.85606e-05	7.19179e-05	5.70143e-05
AUT	H	12	CO2	28.5491	7.15064	18.0059	14.2745	0.316118	0.069932
AUT	H	12	CO	0.335719	0.084087	0.211738	0.16786
AUT	H	12	NH3	7.05115e-05	1.76609e-05	4.44716e-05	3.52558e-05
AUT	H	12	NMVOC	0.0174996	0.00438311	0.011037	0.00874982
AUT	H	12	NOx	0.137139	0.0343489	0.0864934	0.0685694
AUT	H	12	PM10	0.0103206	0.00258497	0.00650918	0.00516028
AUT	H	12	PM2.5	0.0103206	0.00258497	0.00650918	0.00516028
AUT	H	12	SO2	0.00818159	0.00204923	0.00516013	0.00409079
AUT	I	1	CH4	0.013044	0.013044	0.013044	0.013044
AUT	I	1	CO2	250.984	250.984	250.984	250.984
AUT	I	1	CO	2.63618	2.63618	2.63618	2.63618
AUT	I	1	NH3	0.00133689	0.00133689	0.00133689	0.00133689
AUT	I	1	NMVOC	0.23842	0.23842	0.23842	0.23842
AUT	I	1	NOx	1.19742	1.19742	1.19742	1.19742
AUT	I	1	PM10	0.105928	0.105928	0.105928	0.105928
AUT	I	1	PM2.5	0.0751186	0.0751186	0.0751186	0.0751186
AUT	I	1	SO2	0.006153	0.006153	0.006153	0.006153
AUT	I	2	CH4	0.0122024	0.0122024	0.0122024	0.0122024
AUT	I	2	CO2	234.792	234.792	234.792	234.792
AUT	I	2	CO	2.46611	2.46611	2.46611	2.46611
AUT	I	2	NH3	0.00125064	0.00125064	0.00125064	0.00125064
AUT	I	2	NMVOC	0.223038	0.223038	0.223038	0.223038
AUT	I	2	NOx	1.12017	1.12017	1.12017	1.12017
AUT	I	2	PM10	0.0990936	0.0990936	0.0990936	0.0990936
AUT	I	2	PM2.5	0.0702722	0.0702722	0.0702722	0.0702722
AUT	I	2	SO2	0.00575603	0.00575603	0.00575603	0.00575603
AUT	I	3	CH4	0.013044	0.0130163	0.013044	0.013044
AUT	I	3	CO2	250.984	244.668	250.984	250.984
AUT	I	3	CO	2.63618	2.61599	2.63618	2.63618
AUT	I	3	NH3	0.00133689	0.0013261	0.00133689	0.00133689
AUT	I	3	NMVOC	0.23842	0.237416	0.23842	0.23842
AUT	I	3	NOx	1.19742	1.16717	1.19742	1.19742
AUT	I	3	PM10	0.105928	0.105266	0.105928	0.105928
AUT	I	3	PM2.5	0.0751186	0.0744569	0.0751186	0.0751186
AUT	I	3	SO2	0.006153	0.00611227	0.006153	0.006153
AUT	I	4	CH4	0.0126232	0.0125138	0.0126232	0.0126232
AUT	I	4	CO2	242.888	217.887	242.888	242.888
AUT	I	4	CO	2.55115	2.47121	2.55115	2.55115
AUT	I	4	NH3	0.00129376	0.00125105	0.00129376	0.00129376
AUT	I	4	NMVOC	0.230729	0.226754	0.230729	0.230729
AUT	I	4	NOx	1.15879	1.03906	1.15879	1.15879
AUT	I	4	PM10	0.102511	0.0998917	0.102511	0.102511
AUT	I	4	PM2.5	0.0726954	0.0700765	0.0726954	0.0726954
AUT	I	4	SO2	0.00595452	0.00579329	0.00595452	0.00595452
AUT	I	5	CH4	0.013044	0.0129686	0.013044	0.013044
AUT	I	5	CO2	250.984	233.765	250.984	250.984
AUT	I	5	CO	2.63618	2.58113	2.63618	2.63618
AUT	I	5	NH3	0.00133689	0.00130747	0.00133689	0.00133689
AUT	I	5	NMVOC	0.23842	0.235682	0.23842	0.23842
AUT	I	5	NOx	1.19742	1.11496	1.19742	1.19742
AUT	I	5	PM10	0.105928	0.104124	0.105928	0.105928
AUT	I	5	PM2.5	0.0751186	0.0733149	0.0751186	0.0751186
AUT	I	5	SO2	0.006153	0.00604196	0.006153	0.006153
AUT	I	6	CH4	0.0126232	0.0125742	0.0126232	0.0126232
AUT	I	6	CO2	242.888	231.706	242.888	242.888
AUT	I	6	CO	2.55115	2.51539	2.55115	2.55115
AUT	I	6	NH3	0.00129376	0.00127466	0.00129376	0.00129376
AUT	I	6	NMVOC	0.230729	0.228951	0.230729	0.230729
AUT	I	6	NOx	1.15879	1.10524	1.15879	1.15879
AUT	I	6	PM10	0.102511	0.101339	0.102511	0.102511
AUT	I	6	PM2.5	0.0726954	0.0715241	0.0726954	0.0726954
AUT	I	6	SO2	0.00595452	0.00588241	0.00595452	0.00595452
AUT	I	7	CH4	0.013044	0.0130114	0.013044	0.013044
AUT	I	7	CO2	250.984	243.543	250.984	250.984
AUT	I	7	CO	2.63618	2.61239	2.63618	2.63618
AUT	I	7	NH3	0.00133689	0.00132417	0.00133689	0.00133689
AUT	I	7	NMVOC	0.23842	0.237237	0.23842	0.23842
AUT	I	7	NOx	1.19742	1.16178	1.19742	1.19742
AUT	I	7	PM10	0.105928	0.105148	0.105928	0.105928
AUT	I	7	PM2.5	0.0751186	0.0743391	0.0751186	0.0751186
AUT	I	7	SO2	0.006153	0.00610501	0.006153	0.006153
AUT	I	8	CH4	0.013044	0.0130147	0.013044	0.013044
AUT	I	8	CO2	250.984	244.296	250.984	250.984
AUT	I	8	CO	2.63618	2.6148	2.63618	2.63618
AUT	I	8	NH3	0.00133689	0.00132546	0.00133689	0.00133689
AUT	I	8	NMVOC	0.23842	0.237356	0.23842	0.23842
AUT	I	8	NOx	1.19742	1.16539	1.19742	1.19742
AUT	I	8	PM10	0.105928	0.105227	0.105928	0.105928
AUT	I	8	PM2.5	0.0751186	0.074418	0.0751186	0.0751186
AUT	I	8	SO2	0.006153	0.00610987	0.006153	0.006153
AUT	I	9	CH4	0.0126232	0.0126041	0.0126232	0.0126232
AUT	I	9	CO2	242.888	238.526	242.888	242.888
AUT	I	9	CO	2.55115	2.5372	2.55115	2.55115
AUT	I	9	NH3	0.00129376	0.00128631	0.00129376	0.00129376
AUT	I	9	NMVOC	0.230729	0.230035	0.230729	0.230729
AUT	I	9	NOx	1.15879	1.1379	1.15879	1.15879
AUT	I	9	PM10	0.102511	0.102054	0.102511	0.102511
AUT	I	9	PM2.5	0.0726954	0.0722385	0.0726954	0.0726954
AUT	I	9	SO2	0.00595452	0.00592639	0.00595452	0.00595452
AUT	I	10	CH4	0.013044	0.0130252	0.013044	0.013044
AUT	I	10	CO2	250.984	246.694	250.984	250.984
AUT	I	10	CO	2.63618	2.62247	2.63618	2.63618
AUT	I	10	NH3	0.00133689	0.00132956	0.00133689	0.00133689
AUT	I	10	NMVOC	0.23842	0.237738	0.23842	0.23842
AUT	I	10	NOx	1.19742	1.17687	1.19742	1.19742
AUT	I	10	PM10	0.105928	0.105478	0.105928	0.105928
AUT	I	10	PM2.5	0.0751186	0.0746692	0.0751186	0.0751186
AUT	I	10	SO2	0.006153	0.00612533	0.006153	0.006153
AUT	I	11	CH4	0.0126232	0.0126123	0.0126232	0.0126232
AUT	I	11	CO2	242.888	240.411	242.888	242.888
AUT	I	11	CO	2.55115	2.54323	2.55115	2.55115
AUT	I	11	NH3	0.00129376	0.00128953	0.00129376	0.00129376
AUT	I	11	NMVOC	0.230729	0.230335	0.230729	0.230729
AUT	I	11	NOx	1.15879	1.14693	1.15879	1.15879
AUT	I	11	PM10	0.102511	0.102251	0.102511	0.102511
AUT	I	11	PM2.5	0.0726954	0.072436	0.0726954	0.0726954
AUT	I	11	SO2	0.00595452	0.00593854	0.00595452	0.00595452
AUT	I	12	CH4	0.013044	0.0130096	0.013044	0.013044
AUT	I	12	CO2	250.984	243.133	250.984	250.984
AUT	I	12	CO	2.63618	2.61108	2.63618	2.63618
AUT	I	12	NH3	0.00133689	0.00132348	0.00133689	0.00133689
AUT	I	12	NMVOC	0.23842	0.237172	0.23842	0.23842
AUT	I	12	NOx	1.19742	1.15982	1.19742	1.19742
AUT	I	12	PM10	0.105928	0.105105	0.105928	0.105928
AUT	I	12	PM2.5	0.0751186	0.0742962	0.0751186	0.0751186
AUT	I	12	SO2	0.006153	0.00610237	0.006153	0.006153
AUT	J	1	CH4	3.90476	3.90476	3.90476	3.90476
AUT	J	1	CO2	0.173803	0.173803	0.173803	0.173803
AUT	J	1	CO	0.250744	0.250744	0.250744	0.250744
AUT	J	1	NH3	0.13561	0.13561	0.13561	0.13561
AUT	J	1	NMVOC	0.00477024	0.00477024	0.00477024	0.00477024
AUT	J	1	NOx	0.00160036	0.00160036	0.00160036	0.00160036
AUT	J	1	PM10	0.036868	0.036868	0.036868	0.036868
AUT	J	1	PM2.5	0.0233457	0.0233457	0.0233457	0.0233457
AUT	J	1	SO2	0.00116022	0.00116022	0.00116022	0.00116022
AUT	J	2	CH4	3.65284	3.65284	3.65284	3.65284
AUT	J	2	CO2	0.16259	0.16259	0.16259	0.16259
AUT	J	2	CO	0.234567	0.234567	0.234567	0.234567
AUT	J	2	NH3	0.126861	0.126861	0.126861	0.126861
AUT	J	2	NMVOC	0.00446248	0.00446248	0.00446248	0.00446248
AUT	J	2	NOx	0.00149711	0.00149711	0.00149711	0.00149711
AUT	J	2	PM10	0.0344894	0.0344894	0.0344894	0.0344894
AUT	J	2	PM2.5	0.0218395	0.0218395	0.0218395	0.0218395
AUT	J	2	SO2	0.00108537	0.00108537	0.00108537	0.00108537
AUT	J	3	CH4	3.90476	3.90476	3.90476	3.90476
AUT	J	3	CO2	0.173803	0.173803	0.173803	0.173803
AUT	J	3	CO	0.250744	0.250744	0.250744	0.250744
AUT	J	3	NH3	0.13561	0.13561	0.13561	0.13561
AUT	J	3	NMVOC	0.00477024	0.00477024	0.00477024	0.00477024
AUT	J	3	NOx	0.00160036	0.00160036	0.00160036	0.00160036
AUT	J	3	PM10	0.036868	0.036868	0.036868	0.036868
AUT	J	3	PM2.5	0.0233457	0.0233457	0.0233457	0.0233457
AUT	J	3	SO2	0.00116022	0.00116022	0.00116022	0.00116022
AUT	J	4	CH4	3.7788	3.7788	3.7788	3.7788
AUT	J	4	CO2	0.168197	0.168197	0.168197	0.168197
AUT	J	4	CO	0.242656	0.242656	0.242656	0.242656
AUT	J	4	NH3	0.131236	0.131236	0.131236	0.131236
AUT	J	4	NMVOC	0.00461636	0.00461636	0.00461636	0.00461636
AUT	J	4	NOx	0.00154873	0.00154873	0.00154873	0.00154873
AUT	J	4	PM10	0.0356787	0.0356787	0.0356787	0.0356787
AUT	J	4	PM2.5	0.0225926	0.0225926	0.0225926	0.0225926
AUT	J	4	SO2	0.0011228	0.0011228	0.0011228	0.0011228
AUT	J	5	CH4	3.90476	3.90476	3.90476	3.90476
AUT	J	5	CO2	0.173803	0.173803	0.173803	0.173803
AUT	J	5	CO	0.250744	0.250744	0.250744	0.250744
AUT	J	5	NH3	0.13561	0.13561	0.13561	0.13561
AUT	J	5	NMVOC	0.00477024	0.00477024	0.00477024	0.00477024
AUT	J	5	NOx	0.00160036	0.00160036	0.00160036	0.00160036
AUT	J	5	PM10	0.036868	0.036868	0.036868	0.036868
AUT	J	5	PM2.5	0.0233457	0.0233457	0.0233457	0.0233457
AUT	J	5	SO2	0.00116022	0.00116022	0.00116022	0.00116022
AUT	J	6	CH4	3.7788	3.7788	3.7788	3.7788
AUT	J	6	CO2	0.168197	0.168197	0.168197	0.168197
AUT	J	6	CO	0.242656	0.242656	0.242656	0.242656
AUT	J	6	NH3	0.131236	0.131236	0.131236	0.131236
AUT	J	6	NMVOC	0.00461636	0.00461636	0.00461636	0.00461636
AUT	J	6	NOx	0.00154873	0.00154873	0.00154873	0.00154873
AUT	J	6	PM10	0.0356787	0.0356787	0.0356787	0.0356787
AUT	J	6	PM2.5	0.0225926	0.0225926	0.0225926	0.0225926
AUT	J	6	SO2	0.0011228	0.0011228	0.0011228	0.0011228
AUT	J	7	CH4	3.90476	3.90476	3.90476	3.90476
AUT	J	7	CO2	0.173803	0.173803	0.173803	0.173803
AUT	J	7	CO	0.250744	0.250744	0.250744	0.250744
AUT	J	7	NH3	0.13561	0.13561	0.13561	0.13561
AUT	J	7	NMVOC	0.00477024	0.00477024	0.00477024	0.00477024
AUT	J	7	NOx	0.00160036	0.00160036	0.00160036	0.00160036
AUT	J	7	PM10	0.036868	0.036868	0.036868	0.036868
AUT	J	7	PM2.5	0.0233457	0.0233457	0.0233457	0.0233457
AUT	J	7	SO2	0.00116022	0.00116022	0.00116022	0.00116022
AUT	J	8	CH4	3.90476	3.90476	3.90476	3.90476
AUT	J	8	CO2	0.173803	0.173803	0.173803	0.173803
AUT	J	8	CO	0.250744	0.250744	0.250744	0.250744
AUT	J	8	NH3	0.13561	0.13561	0.13561	0.13561
AUT	J	8	NMVOC	0.00477024	0.00477024	0.00477024	0.00477024
AUT	J	8	NOx	0.00160036	0.00160036	0.00160036	0.00160036
AUT	J	8	PM10	0.036868	0.036868	0.036868	0.036868
AUT	J	8	PM2.5	0.0233457	0.0233457	0.0233457	0.0233457
AUT	J	8	SO2	0.00116022	0.00116022	0.00116022	0.00116022
AUT	J	9	CH4	3.7788	3.7788	3.7788	3.7788
AUT	J	9	CO2	0.168197	0.168197	0.168197	0.168197
AUT	J	9	CO	0.242656	0.242656	0.242656	0.242656
AUT	J	9	NH3	0.131236	0.131236	0.131236	0.131236
AUT	J	9	NMVOC	0.00461636	0.00461636	0.00461636	0.00461636
AUT	J	9	NOx	0.00154873	0.00154873	0.00154873	0.00154873
AUT	J	9	PM10	0.0356787	0.0356787	0.0356787	0.0356787
AUT	J	9	PM2.5	0.0225926	0.0225926	0.0225926	0.0225926
AUT	J	9	SO2	0.0011228	0.0011228	0.0011228	0.0011228
AUT	J	10	CH4	3.90476	3.90476	3.90476	3.90476
AUT	J	10	CO2	0.173803	0.173803	0.173803	0.173803
AUT	J	10	CO	0.250744	0.250744	0.250744	0.250744
AUT	J	10	NH3	0.13561	0.13561	0.13561	0.13561
AUT	J	10	NMVOC	0.00477024	0.00477024	0.00477024	0.00477024
AUT	J	10	NOx	0.00160036	0.00160036	0.00160036	0.00160036
AUT	J	10	PM10	0.036868	0.036868	0.036868	0.036868
AUT	J	10	PM2.5	0.0233457	0.0233457	0.0233457	0.0233457
AUT	J	10	SO2	0.00116022	0.00116022	0.00116022	0.00116022
AUT	J	11	CH4	3.7788	3.7788	3.7788	3.7788
AUT	J	11	CO2	0.168197	0.168197	0.168197	0.168197
AUT	J	11	CO	0.242656	0.242656	0.242656	0.242656
AUT	J	11	NH3	0.131236	0.131236	0.131236	0.131236
AUT	J	11	NMVOC	0.00461636	0.00461636	0.00461636	0.00461636
AUT	J	11	NOx	0.00154873	0.00154873	0.00154873	0.00154873
AUT	J	11	PM10	0.0356787	0.0356787	0.0356787	0.0356787
AUT	J	11	PM2.5	0.0225926	0.0225926	0.0225926	0.0225926
AUT	J	11	SO2	0.0011228	0.0011228	0.0011228	0.0011228
AUT	J	12	CH4	3.90476	3.90476	3.90476	3.90476
AUT	J	12	CO2	0.173803	0.173803	0.173803	0.173803
AUT	J	12	CO	0.250744	0.250744	0.250744	0.250744
AUT	J	12	NH3	0.13561	0.13561	0.13561	0.13561
AUT	J	12	NMVOC	0.00477024	0.00477024	0.00477024	0.00477024
AUT	J	12	NOx	0.00160036	0.00160036	0.00160036	0.00160036
AUT	J	12	PM10	0.036868	0.036868	0.036868	0.036868
AUT	J	12	PM2.5	0.0233457	0.0233457	0.0233457	0.0233457
AUT	J	12	SO2	0.00116022	0.00116022	0.00116022	0.00116022
AUT	K	1	CH4	11.0523	11.0523	11.0523	11.0523
AUT	K	1	CO2	0	0	0	0
AUT	K	1	CO	0	0	0	0
AUT	K	1	NH3	1.7258	1.7258	1.7258	1.7258
AUT	K	1	NMVOC	1.59659	1.59659	1.59659	1.59659
AUT	K	1	NOx	0	0	0	0
AUT	K	1	PM10	0.0297284	0.0297284	0.0297284	0.0297284
AUT	K	1	PM2.5	0.00660632	0.00660632	0.00660632	0.00660632
AUT	K	1	SO2	0	0	0	0
AUT	K	2	CH4	11.0778	11.0778	11.0778	11.0778
AUT	K	2	CO2	0	0	0	0
AUT	K	2	CO	0	0	0	0
AUT	K	2	NH3	1.72977	1.72977	1.72977	1.72977
AUT	K	2	NMVOC	1.60027	1.60027	1.60027	1.60027
AUT	K	2	NOx	0	0	0	0
AUT	K	2	PM10	0.0297969	0.0297969	0.0297969	0.0297969
AUT	K	2	PM2.5	0.00662154	0.00662154	0.00662154	0.00662154
AUT	K	2	SO2	0	0	0	0
AUT	K	3	CH4	13.4206	13.4206	13.4206	13.4206
AUT	K	3	CO2	0	0	0	0
AUT	K	3	CO	0	0	0	0
AUT	K	3	NH3	2.09561	2.09561	2.09561	2.09561
AUT	K	3	NMVOC	1.93872	1.93872	1.93872	1.93872
AUT	K	3	NOx	0	0	0	0
AUT	K	3	PM10	0.0360988	0.0360988	0.0360988	0.0360988
AUT	K	3	PM2.5	0.00802196	0.00802196	0.00802196	0.00802196
AUT	K	3	SO2	0	0	0	0
AUT	K	4	CH4	13.7517	13.7517	13.7517	13.7517
AUT	K	4	CO2	0	0	0	0
AUT	K	4	CO	0	0	0	0
AUT	K	4	NH3	2.1473	2.1473	2.1473	2.1473
AUT	K	4	NMVOC	1.98654	1.98654	1.98654	1.98654
AUT	K	4	NOx	0	0	0	0
AUT	K	4	PM10	0.0369893	0.0369893	0.0369893	0.0369893
AUT	K	4	PM2.5	0.00821985	0.00821985	0.00821985	0.00821985
AUT	K	4	SO2	0	0	0	0
AUT	K	5	CH4	15.789	15.789	15.789	15.789
AUT	K	5	CO2	0	0	0	0
AUT	K	5	CO	0	0	0	0
AUT	K	5	NH3	2.46542	2.46542	2.46542	2.46542
AUT	K	5	NMVOC	2.28085	2.28085	2.28085	2.28085
AUT	K	5	NOx	0	0	0	0
AUT	K	5	PM10	0.0424692	0.0424692	0.0424692	0.0424692
AUT	K	5	PM2.5	0.0094376	0.0094376	0.0094376	0.0094376
AUT	K	5	SO2	0	0	0	0
AUT	K	6	CH4	16.8076	16.8076	16.8076	16.8076
AUT	K	6	CO2	0	0	0	0
AUT	K	6	CO	0	0	0	0
AUT	K	6	NH3	2.62448	2.62448	2.62448	2.62448
AUT	K	6	NMVOC	2.428	2.428	2.428	2.428
AUT	K	6	NOx	0	0	0	0
AUT	K	6	PM10	0.0452092	0.0452092	0.0452092	0.0452092
AUT	K	6	PM2.5	0.0100465	0.0100465	0.0100465	0.0100465
AUT	K	6	SO2	0	0	0	0
AUT	K	7	CH4	18.9468	18.9468	18.9468	18.9468
AUT	K	7	CO2	0	0	0	0
AUT	K	7	CO	0	0	0	0
AUT	K	7	NH3	2.95851	2.95851	2.95851	2.95851
AUT	K	7	NMVOC	2.73701	2.73701	2.73701	2.73701
AUT	K	7	NOx	0	0	0	0
AUT	K	7	PM10	0.0509631	0.0509631	0.0509631	0.0509631
AUT	K	7	PM2.5	0.0113251	0.0113251	0.0113251	0.0113251
AUT	K	7	SO2	0	0	0	0
AUT	K	8	CH4	19.7362	19.7362	19.7362	19.7362
AUT	K	8	CO2	0	0	0	0
AUT	K	8	CO	0	0	0	0
AUT	K	8	NH3	3.08178	3.08178	3.08178	3.08178
AUT	K	8	NMVOC	2.85106	2.85106	2.85106	2.85106
AUT	K	8	NOx	0	0	0	0
AUT	K	8	PM10	0.0530865	0.0530865	0.0530865	0.0530865
AUT	K	8	PM2.5	0.011797	0.011797	0.011797	0.011797
AUT	K	8	SO2	0	0	0	0
AUT	K	9	CH4	19.8636	19.8636	19.8636	19.8636
AUT	K	9	CO2	0	0	0	0
AUT	K	9	CO	0	0	0	0
AUT	K	9	NH3	3.10166	3.10166	3.10166	3.10166
AUT	K	9	NMVOC	2.86945	2.86945	2.86945	2.86945
AUT	K	9	NOx	0	0	0	0
AUT	K	9	PM10	0.053429	0.053429	0.053429	0.053429
AUT	K	9	PM2.5	0.0118731	0.0118731	0.0118731	0.0118731
AUT	K	9	SO2	0	0	0	0
AUT	K	10	CH4	17.3679	17.3679	17.3679	17.3679
AUT	K	10	CO2	0	0	0	0
AUT	K	10	CO	0	0	0	0
AUT	K	10	NH3	2.71196	2.71196	2.71196	2.71196
AUT	K	10	NMVOC	2.50893	2.50893	2.50893	2.50893
AUT	K	10	NOx	0	0	0	0
AUT	K	10	PM10	0.0467161	0.0467161	0.0467161	0.0467161
AUT	K	10	PM2.5	0.0103814	0.0103814	0.0103814	0.0103814
AUT	K	10	SO2	0	0	0	0
AUT	K	11	CH4	15.2797	15.2797	15.2797	15.2797
AUT	K	11	CO2	0	0	0	0
AUT	K	11	CO	0	0	0	0
AUT	K	11	NH3	2.38589	2.38589	2.38589	2.38589
AUT	K	11	NMVOC	2.20727	2.20727	2.20727	2.20727
AUT	K	11	NOx	0	0	0	0
AUT	K	11	PM10	0.0410992	0.0410992	0.0410992	0.0410992
AUT	K	11	PM2.5	0.00913316	0.00913316	0.00913316	0.00913316
AUT	K	11	SO2	0	0	0	0
AUT	K	12	CH4	13.4206	13.4206	13.4206	13.4206
AUT	K	12	CO2	0	0	0	0
AUT	K	12	CO	0	0	0	0
AUT	K	12	NH3	2.09561	2.09561	2.09561	2.09561
AUT	K	12	NMVOC	1.93872	1.93872	1.93872	1.93872
AUT	K	12	NOx	0	0	0	0
AUT	K	12	PM10	0.0360988	0.0360988	0.0360988	0.0360988
AUT	K	12	PM2.5	0.00802196	0.00802196	0.00802196	0.00802196
AUT	K	12	SO2	0	0	0	0
AUT	L	1	CH4	1.02181e-05	1.02181e-05	1.02181e-05	1.02181e-05
AUT	L	1	CO2	1.22068	1.22068	1.22068	1.22068
AUT	L	1	CO	9.11765e-05	9.11765e-05	9.11765e-05	9.11765e-05
AUT	L	1	NH3	0	0	0	0
AUT	L	1	NMVOC	0.0998947	0.0998947	0.0998947	0.0998947
AUT	L	1	NOx	3.14402e-06	3.14402e-06	3.14402e-06	3.14402e-06
AUT	L	1	PM10	0.0337725	0.0337725	0.0337725	0.0337725
AUT	L	1	PM2.5	0.00138522	0.00138522	0.00138522	0.00138522
AUT	L	1	SO2	3.87901e-07	3.87901e-07	3.87901e-07	3.87901e-07
AUT	L	2	CH4	1.91178e-05	1.91178e-05	1.91178e-05	1.91178e-05
AUT	L	2	CO2	2.28385	2.28385	2.28385	2.28385
AUT	L	2	CO	0.000170588	0.000170588	0.000170588	0.000170588
AUT	L	2	NH3	5.07231	5.07231	5.07231	5.07231
AUT	L	2	NMVOC	0.1869	0.1869	0.1869	0.1869
AUT	L	2	NOx	5.88235e-06	5.88235e-06	5.88235e-06	5.88235e-06
AUT	L	2	PM10	0.0631873	0.0631873	0.0631873	0.0631873
AUT	L	2	PM2.5	0.0025917	0.0025917	0.0025917	0.0025917
AUT	L	2	SO2	7.2575e-07	7.2575e-07	7.2575e-07	7.2575e-07
AUT	L	3	CH4	0.000112399	0.000112399	0.000112399	0.000112399
AUT	L	3	CO2	13.4275	13.4275	13.4275	13.4275
AUT	L	3	CO	0.00100294	0.00100294	0.00100294	0.00100294
AUT	L	3	NH3	12.8775	12.8775	12.8775	12.8775
AUT	L	3	NMVOC	1.09884	1.09884	1.09884	1.09884
AUT	L	3	NOx	3.45842e-05	3.45842e-05	3.45842e-05	3.45842e-05
AUT	L	3	PM10	0.371498	0.371498	0.371498	0.371498
AUT	L	3	PM2.5	0.0152374	0.0152374	0.0152374	0.0152374
AUT	L	3	SO2	4.26691e-06	4.26691e-06	4.26691e-06	4.26691e-06
AUT	L	4	CH4	0.00012855	0.00012855	0.00012855	0.00012855
AUT	L	4	CO2	15.3569	15.3569	15.3569	15.3569
AUT	L	4	CO	0.00114706	0.00114706	0.00114706	0.00114706
AUT	L	4	NH3	7.60846	7.60846	7.60846	7.60846
AUT	L	4	NMVOC	1.25674	1.25674	1.25674	1.25674
AUT	L	4	NOx	3.95538e-05	3.95538e-05	3.95538e-05	3.95538e-05
AUT	L	4	PM10	0.42488	0.42488	0.42488	0.42488
AUT	L	4	PM2.5	0.017427	0.017427	0.017427	0.017427
AUT	L	4	SO2	4.88005e-06	4.88005e-06	4.88005e-06	4.88005e-06
AUT	L	5	CH4	3.06543e-05	3.06543e-05	3.06543e-05	3.06543e-05
AUT	L	5	CO2	3.66204	3.66204	3.66204	3.66204
AUT	L	5	CO	0.000273529	0.000273529	0.000273529	0.000273529
AUT	L	5	NH3	1.35553	1.35553	1.35553	1.35553
AUT	L	5	NMVOC	0.299684	0.299684	0.299684	0.299684
AUT	L	5	NOx	9.43205e-06	9.43205e-06	9.43205e-06	9.43205e-06
AUT	L	5	PM10	0.101318	0.101318	0.101318	0.101318
AUT	L	5	PM2.5	0.00415566	0.00415566	0.00415566	0.00415566
AUT	L	5	SO2	1.1637e-06	1.1637e-06	1.1637e-06	1.1637e-06
AUT	L	6	CH4	5.9331e-05	5.9331e-05	5.9331e-05	5.9331e-05
AUT	L	6	CO2	7.08781	7.08781	7.08781	7.08781
AUT	L	6	CO	0.000529412	0.000529412	0.000529412	0.000529412
AUT	L	6	NH3	1.04944	1.04944	1.04944	1.04944
AUT	L	6	NMVOC	0.580034	0.580034	0.580034	0.580034
AUT	L	6	NOx	1.82556e-05	1.82556e-05	1.82556e-05	1.82556e-05
AUT	L	6	PM10	0.196098	0.196098	0.196098	0.196098
AUT	L	6	PM2.5	0.00804321	0.00804321	0.00804321	0.00804321
AUT	L	6	SO2	2.25233e-06	2.25233e-06	2.25233e-06	2.25233e-06
AUT	L	7	CH4	0.000143054	0.000143054	0.000143054	0.000143054
AUT	L	7	CO2	17.0895	17.0895	17.0895	17.0895
AUT	L	7	CO	0.00127647	0.00127647	0.00127647	0.00127647
AUT	L	7	NH3	0.542212	0.542212	0.542212	0.542212
AUT	L	7	NMVOC	1.39853	1.39853	1.39853	1.39853
AUT	L	7	NOx	4.40162e-05	4.40162e-05	4.40162e-05	4.40162e-05
AUT	L	7	PM10	0.472815	0.472815	0.472815	0.472815
AUT	L	7	PM2.5	0.0193931	0.0193931	0.0193931	0.0193931
AUT	L	7	SO2	5.43061e-06	5.43061e-06	5.43061e-06	5.43061e-06
AUT	L	8	CH4	0.000204362	0.000204362	0.000204362	0.000204362
AUT	L	8	CO2	24.4136	24.4136	24.4136	24.4136
AUT	L	8	CO	0.00182353	0.00182353	0.00182353	0.00182353
AUT	L	8	NH3	1.35553	1.35553	1.35553	1.35553
AUT	L	8	NMVOC	1.99789	1.99789	1.99789	1.99789
AUT	L	8	NOx	6.28803e-05	6.28803e-05	6.28803e-05	6.28803e-05
AUT	L	8	PM10	0.67545	0.67545	0.67545	0.67545
AUT	L	8	PM2.5	0.0277044	0.0277044	0.0277044	0.0277044
AUT	L	8	SO2	7.75802e-06	7.75802e-06	7.75802e-06	7.75802e-06
AUT	L	9	CH4	0.00012855	0.00012855	0.00012855	0.00012855
AUT	L	9	CO2	15.3569	15.3569	15.3569	15.3569
AUT	L	9	CO	0.00114706	0.00114706	0.00114706	0.00114706
AUT	L	9	NH3	1.96771	1.96771	1.96771	1.96771
AUT	L	9	NMVOC	1.25674	1.25674	1.25674	1.25674
AUT	L	9	NOx	3.95538e-05	3.95538e-05	3.95538e-05	3.95538e-05
AUT	L	9	PM10	0.42488	0.42488	0.42488	0.42488
AUT	L	9	PM2.5	0.017427	0.017427	0.017427	0.017427
AUT	L	9	SO2	4.88005e-06	4.88005e-06	4.88005e-06	4.88005e-06
AUT	L	10	CH4	0.000122617	0.000122617	0.000122617	0.000122617
AUT	L	10	CO2	14.6481	14.6481	14.6481	14.6481
AUT	L	10	CO	0.00109412	0.00109412	0.00109412	0.00109412
AUT	L	10	NH3	0	0	0	0
AUT	L	10	NMVOC	1.19874	1.19874	1.19874	1.19874
AUT	L	10	NOx	3.77282e-05	3.77282e-05	3.77282e-05	3.77282e-05
AUT	L	10	PM10	0.40527	0.40527	0.40527	0.40527
AUT	L	10	PM2.5	0.0166226	0.0166226	0.0166226	0.0166226
AUT	L	10	SO2	4.65481e-06	4.65481e-06	4.65481e-06	4.65481e-06
AUT	L	11	CH4	3.9554e-05	3.9554e-05	3.9554e-05	3.9554e-05
AUT	L	11	CO2	4.72521	4.72521	4.72521	4.72521
AUT	L	11	CO	0.000352941	0.000352941	0.000352941	0.000352941
AUT	L	11	NH3	0	0	0	0
AUT	L	11	NMVOC	0.386689	0.386689	0.386689	0.386689
AUT	L	11	NOx	1.21704e-05	1.21704e-05	1.21704e-05	1.21704e-05
AUT	L	11	PM10	0.130732	0.130732	0.130732	0.130732
AUT	L	11	PM2.5	0.00536214	0.00536214	0.00536214	0.00536214
AUT	L	11	SO2	1.50155e-06	1.50155e-06	1.50155e-06	1.50155e-06
AUT	L	12	CH4	1.02181e-05	1.02181e-05	1.02181e-05	1.02181e-05
AUT	L	12	CO2	1.22068	1.22068	1.22068	1.22068
AUT	L	12	CO	9.11765e-05	9.11765e-05	9.11765e-05	9.11765e-05
AUT	L	12	NH3	0	0	0	0
AUT	L	12	NMVOC	0.0998947	0.0998947	0.0998947	0.0998947
AUT	L	12	NOx	3.14402e-06	3.14402e-06	3.14402e-06	3.14402e-06
AUT	L	12	PM10	0.0337725	0.0337725	0.0337725	0.0337725
AUT	L	12	PM2.5	0.00138522	0.00138522	0.00138522	0.00138522
AUT	L	12	SO2	3.87901e-07	3.87901e-07	3.87901e-07	3.87901e-07
BEL	A	1	CH4	0.0937848	0.0937848	0.0937848	0.0937848
BEL	A	1	CO2	1984.38	1984.38	1984.38	1984.38	2.08492	1.79656
BEL	A	1	CO	0.23503	0.23503	0.23503	0.23503
BEL	A	1	NH3	0.0229973	0.0229973	0.0229973	0.0229973
BEL	A	1	NMVOC	0.0405796	0.0405796	0.0405796	0.0405796
BEL	A	1	NOx	0.78585	0.78585	0.78585	0.78585
BEL	A	1	PM10	0.0310535	0.0310535	0.0310535	0.0310535
BEL	A	1	PM2.5	0.0264202	0.0264202	0.0264202	0.0264202
BEL	A	1	SO2	0.00908062	0.00908062	0.00908062	0.00908062
BEL	A	2	CH4	0.0831608	0.0831608	0.0831608	0.0825779
BEL	A	2	CO2	1759.59	1759.59	1759.59	1747.25	1.50626	1.38642
BEL	A	2	CO	0.208406	0.208406	0.208406	0.206945
BEL	A	2	NH3	0.0203921	0.0203921	0.0203921	0.0202492
BEL	A	2	NMVOC	0.0359827	0.0359827	0.0359827	0.0357305
BEL	A	2	NOx	0.696828	0.696828	0.696828	0.691944
BEL	A	2	PM10	0.0275357	0.0275357	0.0275357	0.0273427
BEL	A	2	PM2.5	0.0234273	0.0234273	0.0234273	0.0232631
BEL	A	2	SO2	0.00805196	0.00805196	0.00805196	0.00799552
BEL	A	3	CH4	0.081509	0.0760263	0.0760326	0.0731502
BEL	A	3	CO2	1724.64	1608.63	1608.76	1547.77	1.19837	1.40287
BEL	A	3	CO	0.204266	0.190526	0.190542	0.183319
BEL	A	3	NH3	0.0199871	0.0186426	0.0186442	0.0179374
BEL	A	3	NMVOC	0.035268	0.0328956	0.0328984	0.0316512
BEL	A	3	NOx	0.682987	0.637046	0.637099	0.612946
BEL	A	3	PM10	0.0269888	0.0251734	0.0251755	0.0242211
BEL	A	3	PM2.5	0.022962	0.0214174	0.0214192	0.0206072
BEL	A	3	SO2	0.00789203	0.00736116	0.00736177	0.00708269
BEL	A	4	CH4	0.0754971	0.065985	0.0636244	0.0605595
BEL	A	4	CO2	1597.43	1396.17	1346.22	1281.37	1.24868	0.917138
BEL	A	4	CO	0.1892	0.165362	0.159446	0.151766
BEL	A	4	NH3	0.0185129	0.0161804	0.0156015	0.01485
BEL	A	4	NMVOC	0.0326667	0.0285509	0.0275295	0.0262034
BEL	A	4	NOx	0.632612	0.552907	0.533127	0.507445
BEL	A	4	PM10	0.0249982	0.0218486	0.021067	0.0200521
BEL	A	4	PM2.5	0.0212683	0.0185887	0.0179237	0.0170603
BEL	A	4	SO2	0.00730993	0.00638893	0.00616037	0.00586361
BEL	A	5	CH4	0.0693911	0.0641513	0.0625069	0.0599315
BEL	A	5	CO2	1468.24	1357.37	1322.57	1268.08	1.13328	1.19524
BEL	A	5	CO	0.173898	0.160767	0.156646	0.150192
BEL	A	5	NH3	0.0170156	0.0157307	0.0153275	0.014696
BEL	A	5	NMVOC	0.0300247	0.0277575	0.027046	0.0259316
BEL	A	5	NOx	0.581448	0.537542	0.523763	0.502183
BEL	A	5	PM10	0.0229764	0.0212414	0.0206969	0.0198442
BEL	A	5	PM2.5	0.0195482	0.0180721	0.0176089	0.0168834
BEL	A	5	SO2	0.00671873	0.00621139	0.00605216	0.00580281
BEL	A	6	CH4	0.0641725	0.0610419	0.0594347	0.0597347
BEL	A	6	CO2	1357.82	1291.58	1257.57	1263.92	1.36079	1.64717
BEL	A	6	CO	0.16082	0.152975	0.148947	0.149699
BEL	A	6	NH3	0.0157359	0.0149683	0.0145742	0.0146477
BEL	A	6	NMVOC	0.0277667	0.0264121	0.0257167	0.0258465
BEL	A	6	NOx	0.53772	0.511488	0.49802	0.500534
BEL	A	6	PM10	0.0212484	0.0202119	0.0196797	0.019779
BEL	A	6	PM2.5	0.0180781	0.0171962	0.0167434	0.0168279
BEL	A	6	SO2	0.00621344	0.00591032	0.0057547	0.00578375
BEL	A	7	CH4	0.0625232	0.0601851	0.0584575	0.0573115
BEL	A	7	CO2	1322.92	1273.45	1236.89	1212.64	1.52104	2.11236
BEL	A	7	CO	0.156687	0.150827	0.146498	0.143626
BEL	A	7	NH3	0.0153315	0.0147582	0.0143345	0.0140535
BEL	A	7	NMVOC	0.027053	0.0260414	0.0252939	0.024798
BEL	A	7	NOx	0.5239	0.504308	0.489832	0.480229
BEL	A	7	PM10	0.0207023	0.0199282	0.0193561	0.0189767
BEL	A	7	PM2.5	0.0176135	0.0169548	0.0164681	0.0161453
BEL	A	7	SO2	0.00605375	0.00582736	0.00566009	0.00554912
BEL	A	8	CH4	0.0674636	0.0666445	0.0660942	0.0615921
BEL	A	8	CO2	1427.45	1410.12	1398.48	1303.22	1.39739	1.82399
BEL	A	8	CO	0.169068	0.167015	0.165636	0.154353
BEL	A	8	NH3	0.016543	0.0163421	0.0162072	0.0151032
BEL	A	8	NMVOC	0.0291907	0.0288363	0.0285982	0.0266502
BEL	A	8	NOx	0.565297	0.558433	0.553823	0.516098
BEL	A	8	PM10	0.0223382	0.022067	0.0218848	0.020394
BEL	A	8	PM2.5	0.0190052	0.0187745	0.0186195	0.0173512
BEL	A	8	SO2	0.00653209	0.00645279	0.00639951	0.00596359
BEL	A	9	CH4	0.0717222	0.0699873	0.0680627	0.0675016
BEL	A	9	CO2	1517.56	1480.85	1440.13	1428.26	1.4919	1.55664
BEL	A	9	CO	0.17974	0.175392	0.170569	0.169163
BEL	A	9	NH3	0.0175872	0.0171618	0.0166899	0.0165523
BEL	A	9	NMVOC	0.0310333	0.0302827	0.0294499	0.0292071
BEL	A	9	NOx	0.600981	0.586444	0.570317	0.565615
BEL	A	9	PM10	0.0237483	0.0231738	0.0225366	0.0223508
BEL	A	9	PM2.5	0.0202049	0.0197162	0.019174	0.0190159
BEL	A	9	SO2	0.00694443	0.00677645	0.00659011	0.00653578
BEL	A	10	CH4	0.0776276	0.0756542	0.0738759	0.0725993
BEL	A	10	CO2	1642.51	1600.75	1563.13	1536.12	1.96305	1.36401
BEL	A	10	CO	0.194539	0.189594	0.185137	0.181938
BEL	A	10	NH3	0.0190353	0.0185514	0.0181153	0.0178023
BEL	A	10	NMVOC	0.0335885	0.0327347	0.0319652	0.0314128
BEL	A	10	NOx	0.650464	0.633928	0.619027	0.60833
BEL	A	10	PM10	0.0257036	0.0250502	0.0244614	0.0240387
BEL	A	10	PM2.5	0.0218685	0.0213126	0.0208116	0.020452
BEL	A	10	SO2	0.00751622	0.00732514	0.00715296	0.00702935
BEL	A	11	CH4	0.0805935	0.0782965	0.0757337	0.0701765
BEL	A	11	CO2	1705.26	1656.66	1602.44	1484.85	1.96004	1.54847
BEL	A	11	CO	0.201972	0.196216	0.189793	0.175866
BEL	A	11	NH3	0.0197626	0.0191993	0.0185709	0.0172082
BEL	A	11	NMVOC	0.0348718	0.033878	0.032769	0.0303645
BEL	A	11	NOx	0.675316	0.656069	0.634594	0.588029
BEL	A	11	PM10	0.0266857	0.0259251	0.0250765	0.0232364
BEL	A	11	PM2.5	0.0227041	0.022057	0.021335	0.0197695
BEL	A	11	SO2	0.00780338	0.00758098	0.00733283	0.00679476
BEL	A	12	CH4	0.0898771	0.0885014	0.0873179	0.0799137
BEL	A	12	CO2	1901.7	1872.59	1847.55	1690.88	1.38113	1.73198
BEL	A	12	CO	0.225237	0.22179	0.218824	0.200268
BEL	A	12	NH3	0.022039	0.0217017	0.0214115	0.0195959
BEL	A	12	NMVOC	0.0388887	0.0382935	0.0377814	0.0345777
BEL	A	12	NOx	0.753106	0.741579	0.731662	0.669619
BEL	A	12	PM10	0.0297596	0.0293041	0.0289122	0.0264606
BEL	A	12	PM2.5	0.0253194	0.0249318	0.0245984	0.0225125
BEL	A	12	SO2	0.00870226	0.00856906	0.00845447	0.00773756
BEL	B	1	CH4	0.250474	0.250474	0.250474	0.250474
BEL	B	1	CO2	3381.72	3381.72	3381.72	3381.72	2.15929	2.16726
BEL	B	1	CO	13.5316	13.5316	13.5316	13.5316
BEL	B	1	NH3	0.179027	0.179027	0.179027	0.179027
BEL	B	1	NMVOC	1.26868	1.26868	1.26868	1.26868
BEL	B	1	NOx	3.45096	3.45096	3.45096	3.45096
BEL	B	1	PM10	0.725603	0.725603	0.725603	0.725603
BEL	B	1	PM2.5	0.323985	0.323985	0.323985	0.323985
BEL	B	1	SO2	2.20093	2.20093	2.20093	2.20093
BEL	B	2	CH4	0.225663	0.225663	0.225663	0.218767
BEL	B	2	CO2	3046.74	3046.74	3046.74	2953.64	2.11742	2.14732
BEL	B	2	CO	12.1912	12.1912	12.1912	11.8187
BEL	B	2	NH3	0.161293	0.161293	0.161293	0.156364
BEL	B	2	NMVOC	1.14301	1.14301	1.14301	1.10808
BEL	B	2	NOx	3.10912	3.10912	3.10912	3.01411
BEL	B	2	PM10	0.653727	0.653727	0.653727	0.63375
BEL	B	2	PM2.5	0.291892	0.291892	0.291892	0.282973
BEL	B	2	SO2	1.98291	1.98291	1.98291	1.92232
BEL	B	3	CH4	0.236946	0.228293	0.175707	0.166487
BEL	B	3	CO2	3199.07	3084.1	2372.27	2247.78	2.30284	2.26496
BEL	B	3	CO	12.8007	12.0312	9.49239	8.99426
BEL	B	3	NH3	0.169358	0.163887	0.125587	0.118997
BEL	B	3	NMVOC	1.20016	1.1749	0.889979	0.843276
BEL	B	3	NOx	3.26458	3.12467	2.42085	2.29381
BEL	B	3	PM10	0.686413	0.647725	0.509009	0.482298
BEL	B	3	PM2.5	0.306487	0.290234	0.227275	0.215348
BEL	B	3	SO2	2.08205	1.99655	1.54395	1.46293
BEL	B	4	CH4	0.219832	0.174975	0.0895978	0.0914489
BEL	B	4	CO2	2968.01	2403.16	1209.68	1234.68	2.2829	1.79243
BEL	B	4	CO	11.8762	8.29851	4.84042	4.94042
BEL	B	4	NH3	0.157125	0.127819	0.0640402	0.0653633
BEL	B	4	NMVOC	1.11347	0.959824	0.453824	0.4632
BEL	B	4	NOx	3.02878	2.35387	1.23445	1.25996
BEL	B	4	PM10	0.636835	0.454409	0.259557	0.26492
BEL	B	4	PM2.5	0.28435	0.206873	0.115894	0.118288
BEL	B	4	SO2	1.93167	1.55361	0.787299	0.803565
BEL	B	5	CH4	0.212441	0.192397	0.121672	0.124956
BEL	B	5	CO2	2868.22	2609.66	1642.73	1687.07	2.28888	2.00178
BEL	B	5	CO	11.4769	9.93165	6.5732	6.75063
BEL	B	5	NH3	0.151843	0.138616	0.0869654	0.0893128
BEL	B	5	NMVOC	1.07604	1.00364	0.616284	0.632919
BEL	B	5	NOx	2.92695	2.62519	1.67636	1.72161
BEL	B	5	PM10	0.615424	0.536392	0.352474	0.361988
BEL	B	5	PM2.5	0.27479	0.241085	0.157381	0.161629
BEL	B	5	SO2	1.86673	1.69042	1.06914	1.098
BEL	B	6	CH4	0.197849	0.177117	0.14978	0.150521
BEL	B	6	CO2	2671.21	2415.13	2022.23	2032.22	2.35468	2.18122
BEL	B	6	CO	10.6886	9.27356	8.09172	8.13172
BEL	B	6	NH3	0.141413	0.12731	0.107056	0.107585
BEL	B	6	NMVOC	1.00213	0.916958	0.758656	0.762407
BEL	B	6	NOx	2.7259	2.43456	2.06363	2.07384
BEL	B	6	PM10	0.573151	0.499508	0.433901	0.436047
BEL	B	6	PM2.5	0.255915	0.224079	0.193739	0.194697
BEL	B	6	SO2	1.7385	1.58125	1.31613	1.32263
BEL	B	7	CH4	0.211765	0.203414	0.149252	0.146163
BEL	B	7	CO2	2859.09	2759.68	2015.09	1973.38	2.0915	2.01972
BEL	B	7	CO	11.4403	10.9512	8.06317	7.89628
BEL	B	7	NH3	0.151359	0.145491	0.106678	0.10447
BEL	B	7	NMVOC	1.07261	1.03367	0.755979	0.740333
BEL	B	7	NOx	2.91763	2.8086	2.05635	2.01379
BEL	B	7	PM10	0.613464	0.587387	0.432371	0.423422
BEL	B	7	PM2.5	0.273915	0.262429	0.193056	0.18906
BEL	B	7	SO2	1.86078	1.80655	1.31148	1.28434
BEL	B	8	CH4	0.212441	0.201836	0.144469	0.145436
BEL	B	8	CO2	2868.22	2732.76	1950.51	1963.57	2.06159	1.96589
BEL	B	8	CO	11.4769	10.6068	7.80476	7.85699
BEL	B	8	NH3	0.151843	0.14497	0.103259	0.10395
BEL	B	8	NMVOC	1.07604	1.04105	0.731752	0.736649
BEL	B	8	NOx	2.92695	2.76436	1.99045	2.00377
BEL	B	8	PM10	0.615424	0.571226	0.418514	0.421315
BEL	B	8	PM2.5	0.27479	0.256073	0.186869	0.188119
BEL	B	8	SO2	1.86673	1.77337	1.26945	1.27795
BEL	B	9	CH4	0.213237	0.2211	0.171014	0.171685
BEL	B	9	CO2	2878.97	2977.48	2308.9	2317.97	2.31082	2.32078
BEL	B	9	CO	11.5199	12.054	9.23882	9.2751
BEL	B	9	NH3	0.152411	0.157768	0.122232	0.122712
BEL	B	9	NMVOC	1.08007	1.11264	0.866205	0.869606
BEL	B	9	NOx	2.93792	3.04915	2.35618	2.36543
BEL	B	9	PM10	0.61773	0.645529	0.495412	0.497358
BEL	B	9	PM2.5	0.275819	0.287847	0.221204	0.222073
BEL	B	9	SO2	1.87372	1.9354	1.5027	1.5086
BEL	B	10	CH4	0.225663	0.226889	0.186367	0.183476
BEL	B	10	CO2	3046.74	3045.87	2516.2	2477.16	2.36664	2.45437
BEL	B	10	CO	12.1912	12.0404	10.0683	9.91208
BEL	B	10	NH3	0.161293	0.162667	0.133206	0.13114
BEL	B	10	NMVOC	1.14301	1.1611	0.943973	0.929328
BEL	B	10	NOx	3.10912	3.0988	2.56772	2.52788
BEL	B	10	PM10	0.653727	0.647738	0.53989	0.531514
BEL	B	10	PM2.5	0.291892	0.289911	0.241064	0.237324
BEL	B	10	SO2	1.98291	1.95777	1.63762	1.61221
BEL	B	11	CH4	0.223236	0.222479	0.142806	0.143118
BEL	B	11	CO2	3013.97	2997.25	1928.07	1932.28	2.18919	2.29287
BEL	B	11	CO	12.0601	12.0195	7.71495	7.73179
BEL	B	11	NH3	0.159558	0.159011	0.102071	0.102294
BEL	B	11	NMVOC	1.13072	1.12636	0.723332	0.72491
BEL	B	11	NOx	3.07568	3.061	1.96755	1.97184
BEL	B	11	PM10	0.646695	0.644603	0.413698	0.414601
BEL	B	11	PM2.5	0.288753	0.287803	0.184718	0.185121
BEL	B	11	SO2	1.96158	1.94486	1.25484	1.25758
BEL	B	12	CH4	0.239089	0.246834	0.162383	0.157589
BEL	B	12	CO2	3228.01	3316.56	2192.38	2127.65	2.2191	2.18521
BEL	B	12	CO	12.9165	13.2768	8.77256	8.51356
BEL	B	12	NH3	0.170889	0.176549	0.116064	0.112637
BEL	B	12	NMVOC	1.21101	1.25255	0.82249	0.798206
BEL	B	12	NOx	3.2941	3.38605	2.23727	2.17121
BEL	B	12	PM10	0.692621	0.712648	0.47041	0.456522
BEL	B	12	PM2.5	0.309259	0.318362	0.21004	0.203839
BEL	B	12	SO2	2.10088	2.14171	1.42687	1.38474
BEL	C	1	CH4	2.34505	2.34505	2.34505	2.34505
BEL	C	1	CO2	3480.26	3480.26	3480.26	3480.26	3.43536	2.95901
BEL	C	1	CO	11.1832	11.1832	11.1832	11.1832
BEL	C	1	NH3	0.183763	0.183763	0.183763	0.183763
BEL	C	1	NMVOC	1.8624	1.8624	1.8624	1.8624
BEL	C	1	NOx	2.07165	2.07165	2.07165	2.07165
BEL	C	1	PM10	1.70077	1.70077	1.70077	1.70077
BEL	C	1	PM2.5	1.6601	1.6601	1.6601	1.6601
BEL	C	1	SO2	0.706235	0.706235	0.706235	0.706235
BEL	C	2	CH4	1.90755	1.90755	1.90755	1.915
BEL	C	2	CO2	2830.97	2830.97	2830.97	2844.31	2.66974	2.62002
BEL	C	2	CO	9.09682	9.09682	9.09682	9.14933
BEL	C	2	NH3	0.14948	0.14948	0.14948	0.150368
BEL	C	2	NMVOC	1.51494	1.51494	1.51494	1.52226
BEL	C	2	NOx	1.68515	1.68515	1.68515	1.69193
BEL	C	2	PM10	1.38347	1.38347	1.38347	1.39179
BEL	C	2	PM2.5	1.35038	1.35038	1.35038	1.35851
BEL	C	2	SO2	0.574478	0.574478	0.574478	0.577623
BEL	C	3	CH4	1.7772	1.78648	1.85089	1.86545
BEL	C	3	CO2	2637.52	2575.5	2635.65	2637.34	2.54165	2.76786
BEL	C	3	CO	8.47521	8.67025	9.21533	9.35814
BEL	C	3	NH3	0.139265	0.142676	0.151971	0.154421
BEL	C	3	NMVOC	1.41142	1.42761	1.49579	1.51227
BEL	C	3	NOx	1.57	1.52578	1.54739	1.5443
BEL	C	3	PM10	1.28893	1.3268	1.41805	1.44283
BEL	C	3	PM2.5	1.25811	1.29512	1.38428	1.40849
BEL	C	3	SO2	0.535222	0.538248	0.564818	0.570688
BEL	C	4	CH4	1.33175	1.34583	1.46092	1.46035
BEL	C	4	CO2	1976.44	1879.89	1984.12	1985.64	2.10881	1.8855
BEL	C	4	CO	6.35093	6.65087	7.63019	7.62198
BEL	C	4	NH3	0.104359	0.109606	0.126309	0.126167
BEL	C	4	NMVOC	1.05766	1.08243	1.20455	1.20377
BEL	C	4	NOx	1.17649	1.10776	1.1442	1.14538
BEL	C	4	PM10	0.965868	1.02416	1.18835	1.18683
BEL	C	4	PM2.5	0.942767	0.999751	1.16018	1.15868
BEL	C	4	SO2	0.401071	0.405633	0.453073	0.452861
BEL	C	5	CH4	0.9483	0.956674	1.01921	1.01572
BEL	C	5	CO2	1407.36	1365.31	1426.41	1421.61	1.94106	1.62511
BEL	C	5	CO	4.5223	4.67535	5.20009	5.17312
BEL	C	5	NH3	0.0743108	0.0769808	0.0859255	0.0854674
BEL	C	5	NMVOC	0.753124	0.766474	0.832428	0.828874
BEL	C	5	NOx	0.837739	0.80716	0.829948	0.827744
BEL	C	5	PM10	0.687764	0.717061	0.804709	0.800307
BEL	C	5	PM2.5	0.671315	0.699952	0.785589	0.781289
BEL	C	5	SO2	0.28559	0.288478	0.314305	0.312848
BEL	C	6	CH4	0.532701	0.536193	0.557859	0.556295
BEL	C	6	CO2	790.574	781.057	812.474	808.89	1.08411	1.14369
BEL	C	6	CO	2.54037	2.59098	2.7559	2.74616
BEL	C	6	NH3	0.0417436	0.042622	0.0454208	0.0452572
BEL	C	6	NMVOC	0.423062	0.427908	0.449838	0.448372
BEL	C	6	NOx	0.470594	0.46321	0.477967	0.476021
BEL	C	6	PM10	0.386347	0.395761	0.422547	0.421072
BEL	C	6	PM2.5	0.377107	0.386308	0.412477	0.411036
BEL	C	6	SO2	0.160428	0.161724	0.170788	0.170119
BEL	C	7	CH4	0.275888	0.276402	0.286442	0.285538
BEL	C	7	CO2	409.442	401.606	424.646	420.221	0.986121	1.04722
BEL	C	7	CO	1.31567	1.33372	1.39617	1.39442
BEL	C	7	NH3	0.0216192	0.0219371	0.0229855	0.0229599
BEL	C	7	NMVOC	0.219106	0.220398	0.229797	0.229162
BEL	C	7	NOx	0.243723	0.238327	0.250845	0.248144
BEL	C	7	PM10	0.200091	0.203726	0.213173	0.213144
BEL	C	7	PM2.5	0.195305	0.198859	0.208087	0.208059
BEL	C	7	SO2	0.0830865	0.083204	0.087501	0.0870873
BEL	C	8	CH4	0.541886	0.543309	0.564904	0.562651
BEL	C	8	CO2	804.205	789.785	833.936	824.397	0.955749	0.956969
BEL	C	8	CO	2.58417	2.62217	2.76538	2.75858
BEL	C	8	NH3	0.0424633	0.0431303	0.0455435	0.0454364
BEL	C	8	NMVOC	0.430357	0.433279	0.453982	0.452266
BEL	C	8	NOx	0.478708	0.46864	0.491945	0.486211
BEL	C	8	PM10	0.393008	0.40053	0.422739	0.422146
BEL	C	8	PM2.5	0.383609	0.390962	0.412656	0.412079
BEL	C	8	SO2	0.163194	0.163602	0.172783	0.171769
BEL	C	9	CH4	0.932227	0.93188	0.951162	0.948103
BEL	C	9	CO2	1383.51	1362.43	1403.83	1388.44	1.35456	1.25172
BEL	C	9	CO	4.44565	4.47692	4.60153	4.5963
BEL	C	9	NH3	0.0730513	0.0736095	0.0757063	0.0756322
BEL	C	9	NMVOC	0.740359	0.741858	0.760166	0.758055
BEL	C	9	NOx	0.82354	0.809526	0.83166	0.822244
BEL	C	9	PM10	0.676107	0.682871	0.702009	0.702057
BEL	C	9	PM2.5	0.659937	0.666551	0.685245	0.685294
BEL	C	9	SO2	0.280749	0.28037	0.28859	0.287186
BEL	C	10	CH4	1.43543	1.44258	1.48243	1.48227
BEL	C	10	CO2	2130.3	2101.66	2146.21	2130.97	1.88273	1.9781
BEL	C	10	CO	6.84536	6.96409	7.28917	7.31276
BEL	C	10	NH3	0.112484	0.114551	0.120085	0.120506
BEL	C	10	NMVOC	1.14	1.15074	1.19226	1.19346
BEL	C	10	NOx	1.26808	1.24683	1.26511	1.25495
BEL	C	10	PM10	1.04106	1.06354	1.11742	1.12248
BEL	C	10	PM2.5	1.01616	1.03814	1.09078	1.09573
BEL	C	10	SO2	0.432295	0.434844	0.451363	0.451129
BEL	C	11	CH4	1.84715	1.85902	1.95475	1.95114
BEL	C	11	CO2	2741.32	2654.61	2729.36	2711.11	2.77005	2.36799
BEL	C	11	CO	8.80876	9.0704	9.90473	9.89871
BEL	C	11	NH3	0.144746	0.149326	0.16357	0.163486
BEL	C	11	NMVOC	1.46697	1.48833	1.591	1.58852
BEL	C	11	NOx	1.63179	1.57029	1.5926	1.58142
BEL	C	11	PM10	1.33966	1.39067	1.53142	1.53151
BEL	C	11	PM2.5	1.30762	1.35748	1.49501	1.4951
BEL	C	11	SO2	0.556286	0.560072	0.599399	0.597741
BEL	C	12	CH4	2.27608	2.29966	2.41114	2.4133
BEL	C	12	CO2	3377.9	3320.96	3431.36	3419.2	2.94616	2.9883
BEL	C	12	CO	10.8543	11.184	12.117	12.1586
BEL	C	12	NH3	0.178358	0.184075	0.199978	0.200705
BEL	C	12	NMVOC	1.80762	1.83969	1.95713	1.96069
BEL	C	12	NOx	2.01071	1.96576	2.00737	1.9986
BEL	C	12	PM10	1.65075	1.71176	1.8675	1.87551
BEL	C	12	PM2.5	1.61127	1.6709	1.82306	1.83089
BEL	C	12	SO2	0.685464	0.694294	0.740354	0.741082
BEL	D	1	CH4	2.07777	2.07777	2.07777	2.07777
BEL	D	1	CO2	12.3233	12.3233	12.3233	12.3233
BEL	D	1	CO	0.0234462	0.0234462	0.0234462	0.0234462
BEL	D	1	NH3	0	0	0	0
BEL	D	1	NMVOC	0.517105	0.517105	0.517105	0.517105
BEL	D	1	NOx	0.00662675	0.00662675	0.00662675	0.00662675
BEL	D	1	PM10	0.0126049	0.0126049	0.0126049	0.0126049
BEL	D	1	PM2.5	0.0110537	0.0110537	0.0110537	0.0110537
BEL	D	1	SO2	0.183506	0.183506	0.183506	0.183506
BEL	D	2	CH4	1.94372	1.94372	1.94372	1.94372
BEL	D	2	CO2	11.5283	11.5283	11.5283	11.5283
BEL	D	2	CO	0.0219335	0.0219335	0.0219335	0.0219335
BEL	D	2	NH3	0	0	0	0
BEL	D	2	NMVOC	0.483744	0.483744	0.483744	0.483744
BEL	D	2	NOx	0.00619922	0.00619922	0.00619922	0.00619922
BEL	D	2	PM10	0.0117917	0.0117917	0.0117917	0.0117917
BEL	D	2	PM2.5	0.0103405	0.0103405	0.0103405	0.0103405
BEL	D	2	SO2	0.171667	0.171667	0.171667	0.171667
BEL	D	3	CH4	2.07777	2.06938	2.07777	2.07777
BEL	D	3	CO2	12.3233	12.2091	12.3233	12.3233
BEL	D	3	CO	0.0234462	0.023228	0.0234462	0.0234462
BEL	D	3	NH3	0	0	0	0
BEL	D	3	NMVOC	0.517105	0.480651	0.517105	0.517105
BEL	D	3	NOx	0.00662675	0.0065651	0.00662675	0.00662675
BEL	D	3	PM10	0.0126049	0.0124877	0.0126049	0.0126049
BEL	D	3	PM2.5	0.0110537	0.0109508	0.0110537	0.0110537
BEL	D	3	SO2	0.183506	0.181799	0.183506	0.183506
BEL	D	4	CH4	1.3405	1.31143	1.3405	1.3405
BEL	D	4	CO2	7.95054	7.95054	7.95054	7.95054
BEL	D	4	CO	0.0151266	0.0151266	0.0151266	0.0151266
BEL	D	4	NH3	0	0	0	0
BEL	D	4	NMVOC	0.333616	0.292456	0.333616	0.333616
BEL	D	4	NOx	0.00427532	0.00427532	0.00427532	0.00427532
BEL	D	4	PM10	0.00813223	0.00813223	0.00813223	0.00813223
BEL	D	4	PM2.5	0.00713141	0.00713141	0.00713141	0.00713141
BEL	D	4	SO2	0.118391	0.118391	0.118391	0.118391
BEL	D	5	CH4	1.38518	1.34992	1.38518	1.38518
BEL	D	5	CO2	8.21556	8.03706	8.21556	8.21556
BEL	D	5	CO	0.0156308	0.0152898	0.0156308	0.0156308
BEL	D	5	NH3	0	0	0	0
BEL	D	5	NMVOC	0.344737	0.314356	0.344737	0.344737
BEL	D	5	NOx	0.00441784	0.00432147	0.00441784	0.00441784
BEL	D	5	PM10	0.0084033	0.00822	0.0084033	0.0084033
BEL	D	5	PM2.5	0.00736913	0.00720838	0.00736913	0.00736913
BEL	D	5	SO2	0.122337	0.119669	0.122337	0.122337
BEL	D	6	CH4	1.3405	1.31717	1.3405	1.3405
BEL	D	6	CO2	7.95054	7.90064	7.95054	7.95054
BEL	D	6	CO	0.0151266	0.0150312	0.0151266	0.0151266
BEL	D	6	NH3	0	0	0	0
BEL	D	6	NMVOC	0.333616	0.322438	0.333616	0.333616
BEL	D	6	NOx	0.00427532	0.00424838	0.00427532	0.00427532
BEL	D	6	PM10	0.00813223	0.00808098	0.00813223	0.00813223
BEL	D	6	PM2.5	0.00713141	0.00708647	0.00713141	0.00713141
BEL	D	6	SO2	0.118391	0.117645	0.118391	0.118391
BEL	D	7	CH4	1.38518	1.36659	1.38518	1.38518
BEL	D	7	CO2	8.21556	8.22745	8.21556	8.21556
BEL	D	7	CO	0.0156308	0.0156535	0.0156308	0.0156308
BEL	D	7	NH3	0	0	0	0
BEL	D	7	NMVOC	0.344737	0.340599	0.344737	0.344737
BEL	D	7	NOx	0.00441784	0.00442426	0.00441784	0.00441784
BEL	D	7	PM10	0.0084033	0.00841552	0.0084033	0.0084033
BEL	D	7	PM2.5	0.00736913	0.00737984	0.00736913	0.00736913
BEL	D	7	SO2	0.122337	0.122515	0.122337	0.122337
BEL	D	8	CH4	1.38518	1.37327	1.38518	1.38518
BEL	D	8	CO2	8.21556	8.18779	8.21556	8.21556
BEL	D	8	CO	0.0156308	0.0155777	0.0156308	0.0156308
BEL	D	8	NH3	0	0	0	0
BEL	D	8	NMVOC	0.344737	0.335297	0.344737	0.344737
BEL	D	8	NOx	0.00441784	0.00440285	0.00441784	0.00441784
BEL	D	8	PM10	0.0084033	0.00837479	0.0084033	0.0084033
BEL	D	8	PM2.5	0.00736913	0.00734412	0.00736913	0.00736913
BEL	D	8	SO2	0.122337	0.121922	0.122337	0.122337
BEL	D	9	CH4	1.3405	1.33336	1.3405	1.3405
BEL	D	9	CO2	7.95054	8.00044	7.95054	7.95054
BEL	D	9	CO	0.0151266	0.0152219	0.0151266	0.0151266
BEL	D	9	NH3	0	0	0	0
BEL	D	9	NMVOC	0.333616	0.32779	0.333616	0.333616
BEL	D	9	NOx	0.00427532	0.00430227	0.00427532	0.00427532
BEL	D	9	PM10	0.00813223	0.00818347	0.00813223	0.00813223
BEL	D	9	PM2.5	0.00713141	0.00717635	0.00713141	0.00713141
BEL	D	9	SO2	0.118391	0.119137	0.118391	0.118391
BEL	D	10	CH4	2.07777	2.08147	2.07777	2.07777
BEL	D	10	CO2	12.3233	12.0318	12.3233	12.3233
BEL	D	10	CO	0.0234462	0.0228893	0.0234462	0.0234462
BEL	D	10	NH3	0	0	0	0
BEL	D	10	NMVOC	0.517105	0.491591	0.517105	0.517105
BEL	D	10	NOx	0.00662675	0.00646936	0.00662675	0.00662675
BEL	D	10	PM10	0.0126049	0.0123056	0.0126049	0.0126049
BEL	D	10	PM2.5	0.0110537	0.0107911	0.0110537	0.0110537
BEL	D	10	SO2	0.183506	0.179147	0.183506	0.183506
BEL	D	11	CH4	2.01074	2.01805	2.01074	2.01074
BEL	D	11	CO2	11.9258	11.6782	11.9258	11.9258
BEL	D	11	CO	0.0226898	0.0222169	0.0226898	0.0226898
BEL	D	11	NH3	0	0	0	0
BEL	D	11	NMVOC	0.500424	0.466707	0.500424	0.500424
BEL	D	11	NOx	0.00641299	0.00627932	0.00641299	0.00641299
BEL	D	11	PM10	0.0121983	0.0119441	0.0121983	0.0121983
BEL	D	11	PM2.5	0.0106971	0.0104742	0.0106971	0.0106971
BEL	D	11	SO2	0.177586	0.173885	0.177586	0.177586
BEL	D	12	CH4	2.07777	2.08393	2.07777	2.07777
BEL	D	12	CO2	12.3233	12.2817	12.3233	12.3233
BEL	D	12	CO	0.0234462	0.0233666	0.0234462	0.0234462
BEL	D	12	NH3	0	0	0	0
BEL	D	12	NMVOC	0.517105	0.491855	0.517105	0.517105
BEL	D	12	NOx	0.00662675	0.00660427	0.00662675	0.00662675
BEL	D	12	PM10	0.0126049	0.0125622	0.0126049	0.0126049
BEL	D	12	PM2.5	0.0110537	0.0110162	0.0110537	0.0110537
BEL	D	12	SO2	0.183506	0.182883	0.183506	0.183506
BEL	E	1	CH4	0	0	0	0
BEL	E	1	CO2	10.1891	10.1891	10.1891	10.1891
BEL	E	1	CO	0.0857546	0.0857546	0.0857546	0.0857546
BEL	E	1	NH3	0.0151991	0.0151991	0.0151991	0.0151991
BEL	E	1	NMVOC	2.90259	2.90259	2.90259	2.90259
BEL	E	1	NOx	0.00713028	0.00713028	0.00713028	0.00713028
BEL	E	1	PM10	0.0424544	0.0424544	0.0424544	0.0424544
BEL	E	1	PM2.5	0.0403316	0.0403316	0.0403316	0.0403316
BEL	E	1	SO2	0.000963636	0.000963636	0.000963636	0.000963636
BEL	E	2	CH4	0	0	0	0
BEL	E	2	CO2	9.28622	9.28622	9.28622	9.28622
BEL	E	2	CO	0.0781561	0.0781561	0.0781561	0.0781561
BEL	E	2	NH3	0.0138523	0.0138523	0.0138523	0.0138523
BEL	E	2	NMVOC	2.64539	2.64539	2.64539	2.64539
BEL	E	2	NOx	0.00649848	0.00649848	0.00649848	0.00649848
BEL	E	2	PM10	0.0386926	0.0386926	0.0386926	0.0386926
BEL	E	2	PM2.5	0.0367579	0.0367579	0.0367579	0.0367579
BEL	E	2	SO2	0.000878251	0.000878251	0.000878251	0.000878251
BEL	E	3	CH4	0	0	0	0
BEL	E	3	CO2	10.6975	10.6975	10.6975	10.6975
BEL	E	3	CO	0.0900338	0.0900166	0.0900338	0.0900338
BEL	E	3	NH3	0.0159575	0.0159575	0.0159575	0.0159575
BEL	E	3	NMVOC	3.04742	3.03645	3.04742	3.04742
BEL	E	3	NOx	0.00748608	0.00745914	0.00748608	0.00748608
BEL	E	3	PM10	0.0445729	0.0445729	0.0445729	0.0445729
BEL	E	3	PM2.5	0.0423442	0.0423442	0.0423442	0.0423442
BEL	E	3	SO2	0.00101172	0.00101017	0.00101172	0.00101172
BEL	E	4	CH4	0	0	0	0
BEL	E	4	CO2	10.318	10.318	10.318	10.318
BEL	E	4	CO	0.0868401	0.0867085	0.0868401	0.0868401
BEL	E	4	NH3	0.0153915	0.0153915	0.0153915	0.0153915
BEL	E	4	NMVOC	2.93933	2.86645	2.93933	2.93933
BEL	E	4	NOx	0.00722053	0.00701376	0.00722053	0.00722053
BEL	E	4	PM10	0.0429918	0.0429918	0.0429918	0.0429918
BEL	E	4	PM2.5	0.0408421	0.0408421	0.0408421	0.0408421
BEL	E	4	SO2	0.000975834	0.000963894	0.000975834	0.000975834
BEL	E	5	CH4	0	0	0	0
BEL	E	5	CO2	10.3526	10.3526	10.3526	10.3526
BEL	E	5	CO	0.0871315	0.0870283	0.0871315	0.0871315
BEL	E	5	NH3	0.0154431	0.0154431	0.0154431	0.0154431
BEL	E	5	NMVOC	2.94919	2.89459	2.94919	2.94919
BEL	E	5	NOx	0.00724476	0.00708261	0.00724476	0.00724476
BEL	E	5	PM10	0.0431361	0.0431361	0.0431361	0.0431361
BEL	E	5	PM2.5	0.0409792	0.0409792	0.0409792	0.0409792
BEL	E	5	SO2	0.000979108	0.000969745	0.000979108	0.000979108
BEL	E	6	CH4	0	0	0	0
BEL	E	6	CO2	10.6276	10.6276	10.6276	10.6276
BEL	E	6	CO	0.0894453	0.0893795	0.0894453	0.0894453
BEL	E	6	NH3	0.0158532	0.0158532	0.0158532	0.0158532
BEL	E	6	NMVOC	3.02751	2.99498	3.02751	3.02751
BEL	E	6	NOx	0.00743715	0.00733376	0.00743715	0.00743715
BEL	E	6	PM10	0.0442816	0.0442816	0.0442816	0.0442816
BEL	E	6	PM2.5	0.0420674	0.0420674	0.0420674	0.0420674
BEL	E	6	SO2	0.00100511	0.000999139	0.00100511	0.00100511
BEL	E	7	CH4	0	0	0	0
BEL	E	7	CO2	11.0471	11.0471	11.0471	11.0471
BEL	E	7	CO	0.092976	0.0929473	0.092976	0.092976
BEL	E	7	NH3	0.016479	0.016479	0.016479	0.016479
BEL	E	7	NMVOC	3.14701	3.13041	3.14701	3.14701
BEL	E	7	NOx	0.00773072	0.00768558	0.00773072	0.00773072
BEL	E	7	PM10	0.0460295	0.0460295	0.0460295	0.0460295
BEL	E	7	PM2.5	0.043728	0.043728	0.043728	0.043728
BEL	E	7	SO2	0.00104478	0.00104218	0.00104478	0.00104478
BEL	E	8	CH4	0	0	0	0
BEL	E	8	CO2	10.3526	10.3526	10.3526	10.3526
BEL	E	8	CO	0.0871315	0.0870699	0.0871315	0.0871315
BEL	E	8	NH3	0.0154431	0.0154431	0.0154431	0.0154431
BEL	E	8	NMVOC	2.94919	2.91687	2.94919	2.94919
BEL	E	8	NOx	0.00724476	0.00714808	0.00724476	0.00724476
BEL	E	8	PM10	0.0431361	0.0431361	0.0431361	0.0431361
BEL	E	8	PM2.5	0.0409792	0.0409792	0.0409792	0.0409792
BEL	E	8	SO2	0.000979108	0.000973525	0.000979108	0.000979108
BEL	E	9	CH4	0	0	0	0
BEL	E	9	CO2	10.7307	10.7307	10.7307	10.7307
BEL	E	9	CO	0.0903137	0.0902665	0.0903137	0.0903137
BEL	E	9	NH3	0.0160071	0.0160071	0.0160071	0.0160071
BEL	E	9	NMVOC	3.0569	3.04405	3.0569	3.0569
BEL	E	9	NOx	0.00750935	0.00743524	0.00750935	0.00750935
BEL	E	9	PM10	0.0447115	0.0447115	0.0447115	0.0447115
BEL	E	9	PM2.5	0.0424758	0.0424758	0.0424758	0.0424758
BEL	E	9	SO2	0.00101487	0.00101059	0.00101487	0.00101487
BEL	E	10	CH4	0	0	0	0
BEL	E	10	CO2	10.8024	10.8024	10.8024	10.8024
BEL	E	10	CO	0.0909164	0.0908703	0.0909164	0.0909164
BEL	E	10	NH3	0.016114	0.016114	0.016114	0.016114
BEL	E	10	NMVOC	3.0773	3.05697	3.0773	3.0773
BEL	E	10	NOx	0.00755947	0.00748696	0.00755947	0.00755947
BEL	E	10	PM10	0.0450099	0.0450099	0.0450099	0.0450099
BEL	E	10	PM2.5	0.0427593	0.0427593	0.0427593	0.0427593
BEL	E	10	SO2	0.00102164	0.00101745	0.00102164	0.00102164
BEL	E	11	CH4	0	0	0	0
BEL	E	11	CO2	10.1812	10.1812	10.1812	10.1812
BEL	E	11	CO	0.0856889	0.0856145	0.0856889	0.0856889
BEL	E	11	NH3	0.0151874	0.0151874	0.0151874	0.0151874
BEL	E	11	NMVOC	2.90036	2.88299	2.90036	2.90036
BEL	E	11	NOx	0.00712481	0.00700794	0.00712481	0.00712481
BEL	E	11	PM10	0.0424219	0.0424219	0.0424219	0.0424219
BEL	E	11	PM2.5	0.0403007	0.0403007	0.0403007	0.0403007
BEL	E	11	SO2	0.000962898	0.000956149	0.000962898	0.000962898
BEL	E	12	CH4	0	0	0	0
BEL	E	12	CO2	9.76004	9.76004	9.76004	9.76004
BEL	E	12	CO	0.0821439	0.082098	0.0821439	0.0821439
BEL	E	12	NH3	0.0145591	0.0145591	0.0145591	0.0145591
BEL	E	12	NMVOC	2.78037	2.76427	2.78037	2.78037
BEL	E	12	NOx	0.00683005	0.00675789	0.00683005	0.00683005
BEL	E	12	PM10	0.0406669	0.0406669	0.0406669	0.0406669
BEL	E	12	PM2.5	0.0386334	0.0386334	0.0386334	0.0386334
BEL	E	12	SO2	0.000923062	0.000918895	0.000923062	0.000923062
BEL	F	1	CH4	0.0401949	0.0401949	0.0401949	0.0401949
BEL	F	1	CO2	2108.18	2108.18	2108.18	2108.18	1.95354	2.11716
BEL	F	1	CO	2.92266	2.92266	2.92266	2.92266
BEL	F	1	NH3	0.0695442	0.0695442	0.0695442	0.0695442
BEL	F	1	NMVOC	0.402325	0.402325	0.402325	0.402325
BEL	F	1	NOx	4.63474	4.63474	4.63474	4.63474
BEL	F	1	PM10	0.275056	0.275056	0.275056	0.275056
BEL	F	1	PM2.5	0.170391	0.170391	0.170391	0.170391
BEL	F	1	SO2	0.00849796	0.00849796	0.00849796	0.00849796
BEL	F	2	CH4	0.0386543	0.0386543	0.0386543	0.0385097
BEL	F	2	CO2	2027.37	2027.37	2027.37	2019.79	1.83365	2.04798
BEL	F	2	CO	2.81064	2.81064	2.81064	2.80013
BEL	F	2	NH3	0.0668787	0.0668787	0.0668787	0.0666285
BEL	F	2	NMVOC	0.386904	0.386904	0.386904	0.385457
BEL	F	2	NOx	4.45709	4.45709	4.45709	4.44042
BEL	F	2	PM10	0.264514	0.264514	0.264514	0.263525
BEL	F	2	PM2.5	0.16386	0.16386	0.16386	0.163248
BEL	F	2	SO2	0.00817224	0.00817224	0.00817224	0.00814168
BEL	F	3	CH4	0.0441193	0.0276334	0.0312664	0.0288519
BEL	F	3	CO2	2314.01	1598.71	1639.89	1513.25	2.03462	1.72077
BEL	F	3	CO	3.20802	2.07853	2.27345	2.09788
BEL	F	3	NH3	0.0763342	0.0492886	0.0540963	0.0499188
BEL	F	3	NMVOC	0.441606	0.276348	0.312956	0.288789
BEL	F	3	NOx	5.08725	3.31616	3.60522	3.32681
BEL	F	3	PM10	0.301912	0.207203	0.213958	0.197435
BEL	F	3	PM2.5	0.187028	0.127709	0.132542	0.122307
BEL	F	3	SO2	0.00932766	0.00652167	0.0066103	0.00609983
BEL	F	4	CH4	0.0453339	0.0139901	0.0158814	0.0155001
BEL	F	4	CO2	2377.71	1005.05	832.959	812.963	2.04804	1.3943
BEL	F	4	CO	3.29633	1.14302	1.15477	1.12705
BEL	F	4	NH3	0.0784355	0.0268899	0.0274775	0.0268179
BEL	F	4	NMVOC	0.453763	0.13959	0.158962	0.155146
BEL	F	4	NOx	5.2273	1.84899	1.83122	1.78726
BEL	F	4	PM10	0.310223	0.128619	0.108677	0.106068
BEL	F	4	PM2.5	0.192176	0.0784994	0.0673231	0.0657069
BEL	F	4	SO2	0.00958444	0.00419182	0.00335762	0.00327701
BEL	F	5	CH4	0.0470717	0.0260261	0.0251426	0.0248533
BEL	F	5	CO2	2468.86	1552.13	1318.7	1303.53	2.10949	1.80745
BEL	F	5	CO	3.42269	1.97915	1.82818	1.80714
BEL	F	5	NH3	0.0814422	0.0468811	0.0435012	0.0430005
BEL	F	5	NMVOC	0.471157	0.260199	0.251662	0.248765
BEL	F	5	NOx	5.42767	3.16363	2.89911	2.86575
BEL	F	5	PM10	0.322115	0.200777	0.172053	0.170073
BEL	F	5	PM2.5	0.199543	0.123565	0.106583	0.105356
BEL	F	5	SO2	0.00995184	0.00635348	0.00531563	0.00525445
BEL	F	6	CH4	0.0464997	0.0381512	0.0345018	0.0331763
BEL	F	6	CO2	2438.86	2081.69	1809.58	1740.06	2.0083	2.15155
BEL	F	6	CO	3.3811	2.81147	2.5087	2.41233
BEL	F	6	NH3	0.0804526	0.0668069	0.0596941	0.0574009
BEL	F	6	NMVOC	0.465432	0.381737	0.345341	0.332074
BEL	F	6	NOx	5.36172	4.46924	3.97828	3.82545
BEL	F	6	PM10	0.318201	0.270854	0.236098	0.227028
BEL	F	6	PM2.5	0.197118	0.167437	0.146257	0.140639
BEL	F	6	SO2	0.00983091	0.00843299	0.00729432	0.00701411
BEL	F	7	CH4	0.0461328	0.0422191	0.0369014	0.0340803
BEL	F	7	CO2	2419.61	2261.51	1935.44	1787.47	2.10655	2.13165
BEL	F	7	CO	3.35442	3.09171	2.68318	2.47806
BEL	F	7	NH3	0.0798178	0.0735131	0.0638458	0.0589649
BEL	F	7	NMVOC	0.461759	0.422509	0.369359	0.341122
BEL	F	7	NOx	5.31941	4.90914	4.25497	3.92969
BEL	F	7	PM10	0.31569	0.294626	0.252519	0.233214
BEL	F	7	PM2.5	0.195563	0.182309	0.15643	0.144471
BEL	F	7	SO2	0.00975334	0.00914047	0.00780165	0.00720522
BEL	F	8	CH4	0.0455483	0.0388139	0.0337653	0.0313327
BEL	F	8	CO2	2388.95	2107.9	1770.95	1643.37	2.10919	2.18446
BEL	F	8	CO	3.31192	2.8557	2.45515	2.27827
BEL	F	8	NH3	0.0788065	0.0678688	0.0584198	0.0542111
BEL	F	8	NMVOC	0.455909	0.388384	0.337969	0.31362
BEL	F	8	NOx	5.25202	4.53822	3.89336	3.61287
BEL	F	8	PM10	0.31169	0.274353	0.231058	0.214412
BEL	F	8	PM2.5	0.193085	0.169642	0.143135	0.132823
BEL	F	8	SO2	0.00962976	0.00853422	0.00713861	0.00662433
BEL	F	9	CH4	0.0465924	0.0414099	0.0416371	0.039062
BEL	F	9	CO2	2443.72	2234.01	2183.82	2048.76	2.00561	2.30764
BEL	F	9	CO	3.38784	3.0398	3.02753	2.84029
BEL	F	9	NH3	0.0806131	0.072261	0.0720395	0.0675841
BEL	F	9	NMVOC	0.46636	0.414385	0.416761	0.390986
BEL	F	9	NOx	5.37242	4.82883	4.80104	4.50411
BEL	F	9	PM10	0.318835	0.2909	0.284926	0.267304
BEL	F	9	PM2.5	0.197511	0.179936	0.176505	0.165589
BEL	F	9	SO2	0.00985052	0.00903737	0.00880288	0.00825845
BEL	F	10	CH4	0.0475464	0.037241	0.0389023	0.0363454
BEL	F	10	CO2	2493.75	2095.75	2040.38	1906.27	2.18022	2.30411
BEL	F	10	CO	3.4572	2.77394	2.82868	2.64275
BEL	F	10	NH3	0.0822635	0.0658436	0.0673078	0.0628839
BEL	F	10	NMVOC	0.475908	0.372526	0.389387	0.363794
BEL	F	10	NOx	5.48241	4.41801	4.48569	4.19086
BEL	F	10	PM10	0.325363	0.272116	0.266211	0.248714
BEL	F	10	PM2.5	0.201555	0.167951	0.164912	0.154073
BEL	F	10	SO2	0.0100522	0.00852167	0.00822468	0.0076841
BEL	F	11	CH4	0.0439086	0.0294192	0.0265067	0.0249114
BEL	F	11	CO2	2302.96	1743.89	1390.25	1306.57	2.19087	1.9665
BEL	F	11	CO	3.19269	2.23227	1.92736	1.81136
BEL	F	11	NH3	0.0759696	0.0528883	0.0458613	0.043101
BEL	F	11	NMVOC	0.439497	0.29414	0.265315	0.249347
BEL	F	11	NOx	5.06295	3.56686	3.0564	2.87244
BEL	F	11	PM10	0.30047	0.225668	0.181387	0.17047
BEL	F	11	PM2.5	0.186134	0.138924	0.112365	0.105602
BEL	F	11	SO2	0.00928311	0.00713357	0.00560402	0.00526673
BEL	F	12	CH4	0.0423702	0.0313706	0.0272262	0.0254613
BEL	F	12	CO2	2222.27	1841.24	1427.98	1335.42	2.12394	2.14462
BEL	F	12	CO	3.08083	2.37184	1.97968	1.85135
BEL	F	12	NH3	0.0733078	0.0562151	0.0471061	0.0440525
BEL	F	12	NMVOC	0.424098	0.31368	0.272517	0.254851
BEL	F	12	NOx	4.88556	3.78753	3.13936	2.93585
BEL	F	12	PM10	0.289942	0.238416	0.186311	0.174233
BEL	F	12	PM2.5	0.179613	0.146843	0.115415	0.107934
BEL	F	12	SO2	0.00895786	0.00752342	0.00575614	0.005383
BEL	H	1	CH4	0.000126453	0.000126453	0.000126453	0.000126453
BEL	H	1	CO2	36.8627	36.8627	36.8627	36.8627	0.379015	0.388221
BEL	H	1	CO	0.185226	0.185226	0.185226	0.185226
BEL	H	1	NH3	0	0	0	0
BEL	H	1	NMVOC	0.0140779	0.0140779	0.0140779	0.0140779
BEL	H	1	NOx	0.169852	0.169852	0.169852	0.169852
BEL	H	1	PM10	0.00143892	0.00143892	0.00143892	0.00143892
BEL	H	1	PM2.5	0.00111341	0.00111341	0.00111341	0.00111341
BEL	H	1	SO2	0.00974468	0.00974468	0.00974468	0.00974468
BEL	H	2	CH4	0.000118294	0.000118294	0.000114937	0.000118294
BEL	H	2	CO2	34.4845	34.4845	33.5057	34.4845	0.334859	0.368362
BEL	H	2	CO	0.173276	0.173276	0.168358	0.173276
BEL	H	2	NH3	0	0	0	0
BEL	H	2	NMVOC	0.0131697	0.0131697	0.0127959	0.0131697
BEL	H	2	NOx	0.158894	0.158894	0.154384	0.158894
BEL	H	2	PM10	0.00134609	0.00134609	0.00130788	0.00134609
BEL	H	2	PM2.5	0.00104158	0.00104158	0.00101201	0.00104158
BEL	H	2	SO2	0.00911599	0.00911599	0.00885724	0.00911599
BEL	H	3	CH4	0.000126453	8.32885e-05	8.64224e-05	5.18048e-05
BEL	H	3	CO2	36.8627	24.2798	25.1934	15.1018	0.404836	0.298275
BEL	H	3	CO	0.185226	0.122	0.12659	0.075883
BEL	H	3	NH3	0	0	0	0
BEL	H	3	NMVOC	0.0140779	0.00927249	0.00962138	0.00576741
BEL	H	3	NOx	0.169852	0.111874	0.116083	0.0695845
BEL	H	3	PM10	0.00143892	0.000947751	0.000983411	0.000589493
BEL	H	3	PM2.5	0.00111341	0.000733353	0.000760946	0.000456139
BEL	H	3	SO2	0.00974468	0.00641838	0.00665987	0.00399217
BEL	H	4	CH4	0.000122373	2.56172e-05	2.4597e-05	1.22373e-05
BEL	H	4	CO2	35.6736	7.46779	7.17038	3.56736	0.437784	0.131935
BEL	H	4	CO	0.179251	0.0375238	0.0360294	0.0179251
BEL	H	4	NH3	0	0	0	0
BEL	H	4	NMVOC	0.0136238	0.00285196	0.00273838	0.00136238
BEL	H	4	NOx	0.164373	0.0344092	0.0330389	0.0164373
BEL	H	4	PM10	0.0013925	0.000291502	0.000279893	0.00013925
BEL	H	4	PM2.5	0.00107749	0.000225559	0.000216576	0.000107749
BEL	H	4	SO2	0.00943033	0.00197411	0.00189549	0.000943033
BEL	H	5	CH4	0.000126453	3.088e-05	2.73114e-05	6.73054e-06
BEL	H	5	CO2	36.8627	9.00197	7.96166	1.96205	0.453799	0.16326
BEL	H	5	CO	0.185226	0.0452327	0.0400054	0.00985881
BEL	H	5	NH3	0	0	0	0
BEL	H	5	NMVOC	0.0140779	0.00343786	0.00304057	0.000749309
BEL	H	5	NOx	0.169852	0.0414783	0.0366848	0.00904051
BEL	H	5	PM10	0.00143892	0.000351388	0.00031078	7.65877e-05
BEL	H	5	PM2.5	0.00111341	0.000271897	0.000240476	5.92622e-05
BEL	H	5	SO2	0.00974468	0.00237967	0.00210467	0.000518668
BEL	H	6	CH4	0.000122373	3.58392e-05	2.67796e-05	6.11867e-06
BEL	H	6	CO2	35.6736	10.4476	7.80662	1.78368	0.459885	0.15994
BEL	H	6	CO	0.179251	0.0524969	0.0392264	0.00896256
BEL	H	6	NH3	0	0	0	0
BEL	H	6	NMVOC	0.0136238	0.00398997	0.00298136	0.00068119
BEL	H	6	NOx	0.164373	0.0481395	0.0359705	0.00821865
BEL	H	6	PM10	0.0013925	0.000407819	0.000304728	6.96252e-05
BEL	H	6	PM2.5	0.00107749	0.000315563	0.000235793	5.38747e-05
BEL	H	6	SO2	0.00943033	0.00276184	0.00206368	0.000471517
BEL	H	7	CH4	0.000126453	5.77583e-05	8.85855e-05	1.73362e-05
BEL	H	7	CO2	36.8627	16.8374	25.8239	5.05376	0.508181	0.2499
BEL	H	7	CO	0.185226	0.0846036	0.129759	0.0253939
BEL	H	7	NH3	0	0	0	0
BEL	H	7	NMVOC	0.0140779	0.00643021	0.0098622	0.00193004
BEL	H	7	NOx	0.169852	0.0775813	0.118989	0.0232862
BEL	H	7	PM10	0.00143892	0.000657239	0.00100803	0.000197271
BEL	H	7	PM2.5	0.00111341	0.00050856	0.000779992	0.000152645
BEL	H	7	SO2	0.00974468	0.00445096	0.00682657	0.00133596
BEL	H	8	CH4	0.000126453	6.12638e-05	9.74896e-05	6.32263e-05
BEL	H	8	CO2	36.8627	17.8593	28.4196	18.4314	0.496994	0.275042
BEL	H	8	CO	0.185226	0.0897385	0.142802	0.0926131
BEL	H	8	NH3	0	0	0	0
BEL	H	8	NMVOC	0.0140779	0.00682049	0.0108535	0.00703897
BEL	H	8	NOx	0.169852	0.08229	0.130949	0.084926
BEL	H	8	PM10	0.00143892	0.000697129	0.00110935	0.00071946
BEL	H	8	PM2.5	0.00111341	0.000539426	0.000858392	0.000556705
BEL	H	8	SO2	0.00974468	0.00472111	0.00751273	0.00487234
BEL	H	9	CH4	0.000122373	5.25853e-05	9.75506e-05	6.11867e-05
BEL	H	9	CO2	35.6736	15.3294	28.4374	17.8368	0.469577	0.234661
BEL	H	9	CO	0.179251	0.0770263	0.142891	0.0896256
BEL	H	9	NH3	0	0	0	0
BEL	H	9	NMVOC	0.0136238	0.0058543	0.0108603	0.0068119
BEL	H	9	NOx	0.164373	0.0706329	0.131031	0.0821865
BEL	H	9	PM10	0.0013925	0.000598375	0.00111004	0.000696252
BEL	H	9	PM2.5	0.00107749	0.000463012	0.000858929	0.000538747
BEL	H	9	SO2	0.00943033	0.00405232	0.00751744	0.00471517
BEL	H	10	CH4	0.000126453	5.53561e-05	9.89428e-05	6.32263e-05
BEL	H	10	CO2	36.8627	16.1371	28.8432	18.4314	0.45596	0.230294
BEL	H	10	CO	0.185226	0.081085	0.14493	0.0926131
BEL	H	10	NH3	0	0	0	0
BEL	H	10	NMVOC	0.0140779	0.00616279	0.0110153	0.00703897
BEL	H	10	NOx	0.169852	0.0743548	0.132901	0.084926
BEL	H	10	PM10	0.00143892	0.000629905	0.00112588	0.00071946
BEL	H	10	PM2.5	0.00111341	0.000487409	0.000871188	0.000556705
BEL	H	10	SO2	0.00974468	0.00426585	0.00762472	0.00487234
BEL	H	11	CH4	0.000122373	5.01901e-05	8.70419e-05	6.11867e-05
BEL	H	11	CO2	35.6736	14.6311	25.374	17.8368	0.407495	0.225505
BEL	H	11	CO	0.179251	0.0735178	0.127498	0.0896256
BEL	H	11	NH3	0	0	0	0
BEL	H	11	NMVOC	0.0136238	0.00558765	0.00969036	0.0068119
BEL	H	11	NOx	0.164373	0.0674157	0.116915	0.0821865
BEL	H	11	PM10	0.0013925	0.00057112	0.000990462	0.000696252
BEL	H	11	PM2.5	0.00107749	0.000441922	0.000766401	0.000538747
BEL	H	11	SO2	0.00943033	0.00386775	0.00670762	0.00471517
BEL	H	12	CH4	0.000126453	6.07671e-05	7.75376e-05	6.32263e-05
BEL	H	12	CO2	36.8627	17.7145	22.6033	18.4314	0.410356	0.249721
BEL	H	12	CO	0.185226	0.0890108	0.113576	0.0926131
BEL	H	12	NH3	0	0	0	0
BEL	H	12	NMVOC	0.0140779	0.00676518	0.00863224	0.00703897
BEL	H	12	NOx	0.169852	0.0816228	0.104149	0.084926
BEL	H	12	PM10	0.00143892	0.000691476	0.000882311	0.00071946
BEL	H	12	PM2.5	0.00111341	0.000535052	0.000682716	0.000556705
BEL	H	12	SO2	0.00974468	0.00468283	0.0059752	0.00487234
BEL	I	1	CH4	0.0172282	0.0172282	0.0172282	0.0172282
BEL	I	1	CO2	144.439	144.439	144.439	144.439
BEL	I	1	CO	2.77353	2.77353	2.77353	2.77353
BEL	I	1	NH3	0.000321142	0.000321142	0.000321142	0.000321142
BEL	I	1	NMVOC	0.267169	0.267169	0.267169	0.267169
BEL	I	1	NOx	0.731323	0.731323	0.731323	0.731323
BEL	I	1	PM10	0.0769506	0.0769506	0.0769506	0.0769506
BEL	I	1	PM2.5	0.0547876	0.0547876	0.0547876	0.0547876
BEL	I	1	SO2	0.0188576	0.0188576	0.0188576	0.0188576
BEL	I	2	CH4	0.0161167	0.0161167	0.0161167	0.0161167
BEL	I	2	CO2	135.121	135.121	135.121	135.121
BEL	I	2	CO	2.59459	2.59459	2.59459	2.59459
BEL	I	2	NH3	0.000300423	0.000300423	0.000300423	0.000300423
BEL	I	2	NMVOC	0.249933	0.249933	0.249933	0.249933
BEL	I	2	NOx	0.684141	0.684141	0.684141	0.684141
BEL	I	2	PM10	0.071986	0.071986	0.071986	0.071986
BEL	I	2	PM2.5	0.0512529	0.0512529	0.0512529	0.0512529
BEL	I	2	SO2	0.017641	0.017641	0.017641	0.017641
BEL	I	3	CH4	0.0172282	0.0169211	0.0172282	0.0172282
BEL	I	3	CO2	144.439	142.103	144.439	144.439
BEL	I	3	CO	2.77353	2.75262	2.77353	2.77353
BEL	I	3	NH3	0.000321142	0.000315381	0.000321142	0.000321142
BEL	I	3	NMVOC	0.267169	0.263086	0.267169	0.267169
BEL	I	3	NOx	0.731323	0.72302	0.731323	0.731323
BEL	I	3	PM10	0.0769506	0.075763	0.0769506	0.0769506
BEL	I	3	PM2.5	0.0547876	0.0541238	0.0547876	0.0547876
BEL	I	3	SO2	0.0188576	0.0187084	0.0188576	0.0188576
BEL	I	4	CH4	0.0166725	0.0157278	0.0166725	0.0166725
BEL	I	4	CO2	139.78	132.595	139.78	139.78
BEL	I	4	CO	2.68406	2.61975	2.68406	2.68406
BEL	I	4	NH3	0.000310782	0.000293063	0.000310782	0.000310782
BEL	I	4	NMVOC	0.258551	0.245993	0.258551	0.258551
BEL	I	4	NOx	0.707732	0.682193	0.707732	0.707732
BEL	I	4	PM10	0.0744683	0.0708154	0.0744683	0.0744683
BEL	I	4	PM2.5	0.0530202	0.0509787	0.0530202	0.0530202
BEL	I	4	SO2	0.0182493	0.0177903	0.0182493	0.0182493
BEL	I	5	CH4	0.0172282	0.0168357	0.0172282	0.0172282
BEL	I	5	CO2	144.439	141.454	144.439	144.439
BEL	I	5	CO	2.77353	2.74681	2.77353	2.77353
BEL	I	5	NH3	0.000321142	0.00031378	0.000321142	0.000321142
BEL	I	5	NMVOC	0.267169	0.261952	0.267169	0.267169
BEL	I	5	NOx	0.731323	0.720712	0.731323	0.731323
BEL	I	5	PM10	0.0769506	0.0754329	0.0769506	0.0769506
BEL	I	5	PM2.5	0.0547876	0.0539394	0.0547876	0.0547876
BEL	I	5	SO2	0.0188576	0.0186669	0.0188576	0.0188576
BEL	I	6	CH4	0.0166725	0.0163064	0.0166725	0.0166725
BEL	I	6	CO2	139.78	136.996	139.78	139.78
BEL	I	6	CO	2.68406	2.65914	2.68406	2.68406
BEL	I	6	NH3	0.000310782	0.000303916	0.000310782	0.000310782
BEL	I	6	NMVOC	0.258551	0.253685	0.258551	0.258551
BEL	I	6	NOx	0.707732	0.697836	0.707732	0.707732
BEL	I	6	PM10	0.0744683	0.0730528	0.0744683	0.0744683
BEL	I	6	PM2.5	0.0530202	0.0522291	0.0530202	0.0530202
BEL	I	6	SO2	0.0182493	0.0180714	0.0182493	0.0182493
BEL	I	7	CH4	0.0172282	0.0170349	0.0172282	0.0172282
[truncated: 32,453 more rows]
