# Supplementary material for: Towards near-real-time air pollutant and greenhouse gas emissions: lessons learned from multiple estimates during the COVID-19 pandemic
Source: Copernicus journal article supplement (doi:10.5194/acp-23-8081-2023), 2023-07-19
Supplement: Supplementary file 2 [file acp-23-8081-2023-supplement.zip › supplementary_intercomparison_2020_eu_emissions_v2.docx]

**Supplementary material**

| 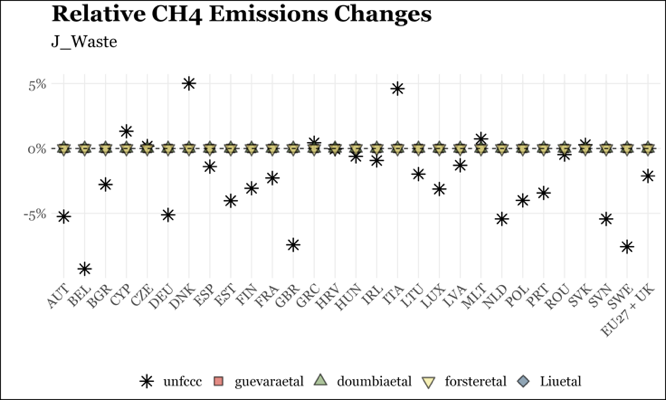 | 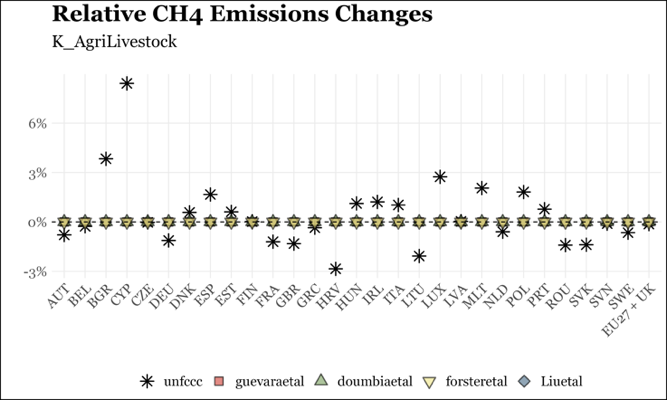 |
| --- | --- |
| 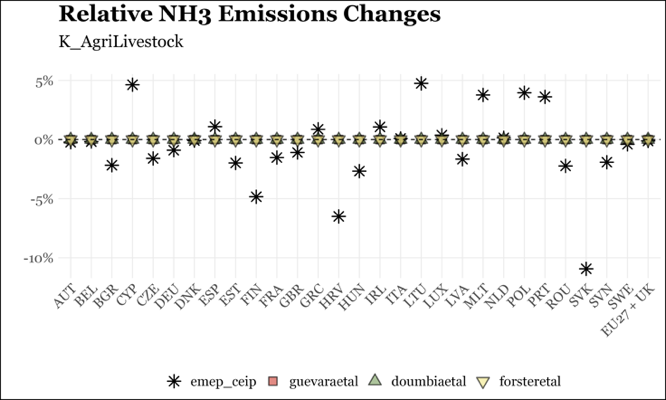 | 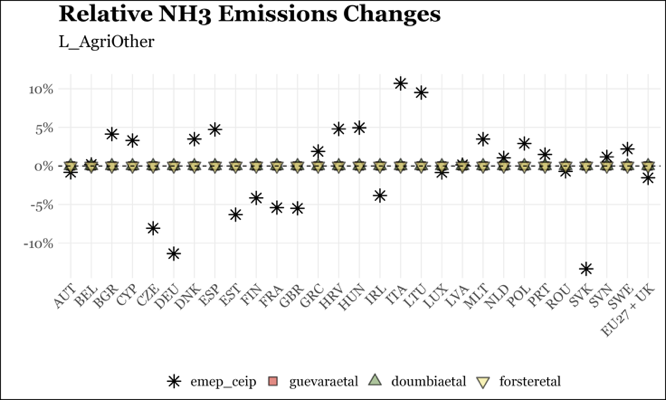 |

Figure S1: Relative emission changes [%] reported by official (emep_ceip, unfccc) and non-official datasets (guevaraetal, forsteretal, doumbiaetal) per country and at the EU27+UK level for the waste management (GNFR_J, CH$) , livestock (GNFR_K, CH4 and NH3) (and other agricultural emissions (GNFR_L, NH3) (d)


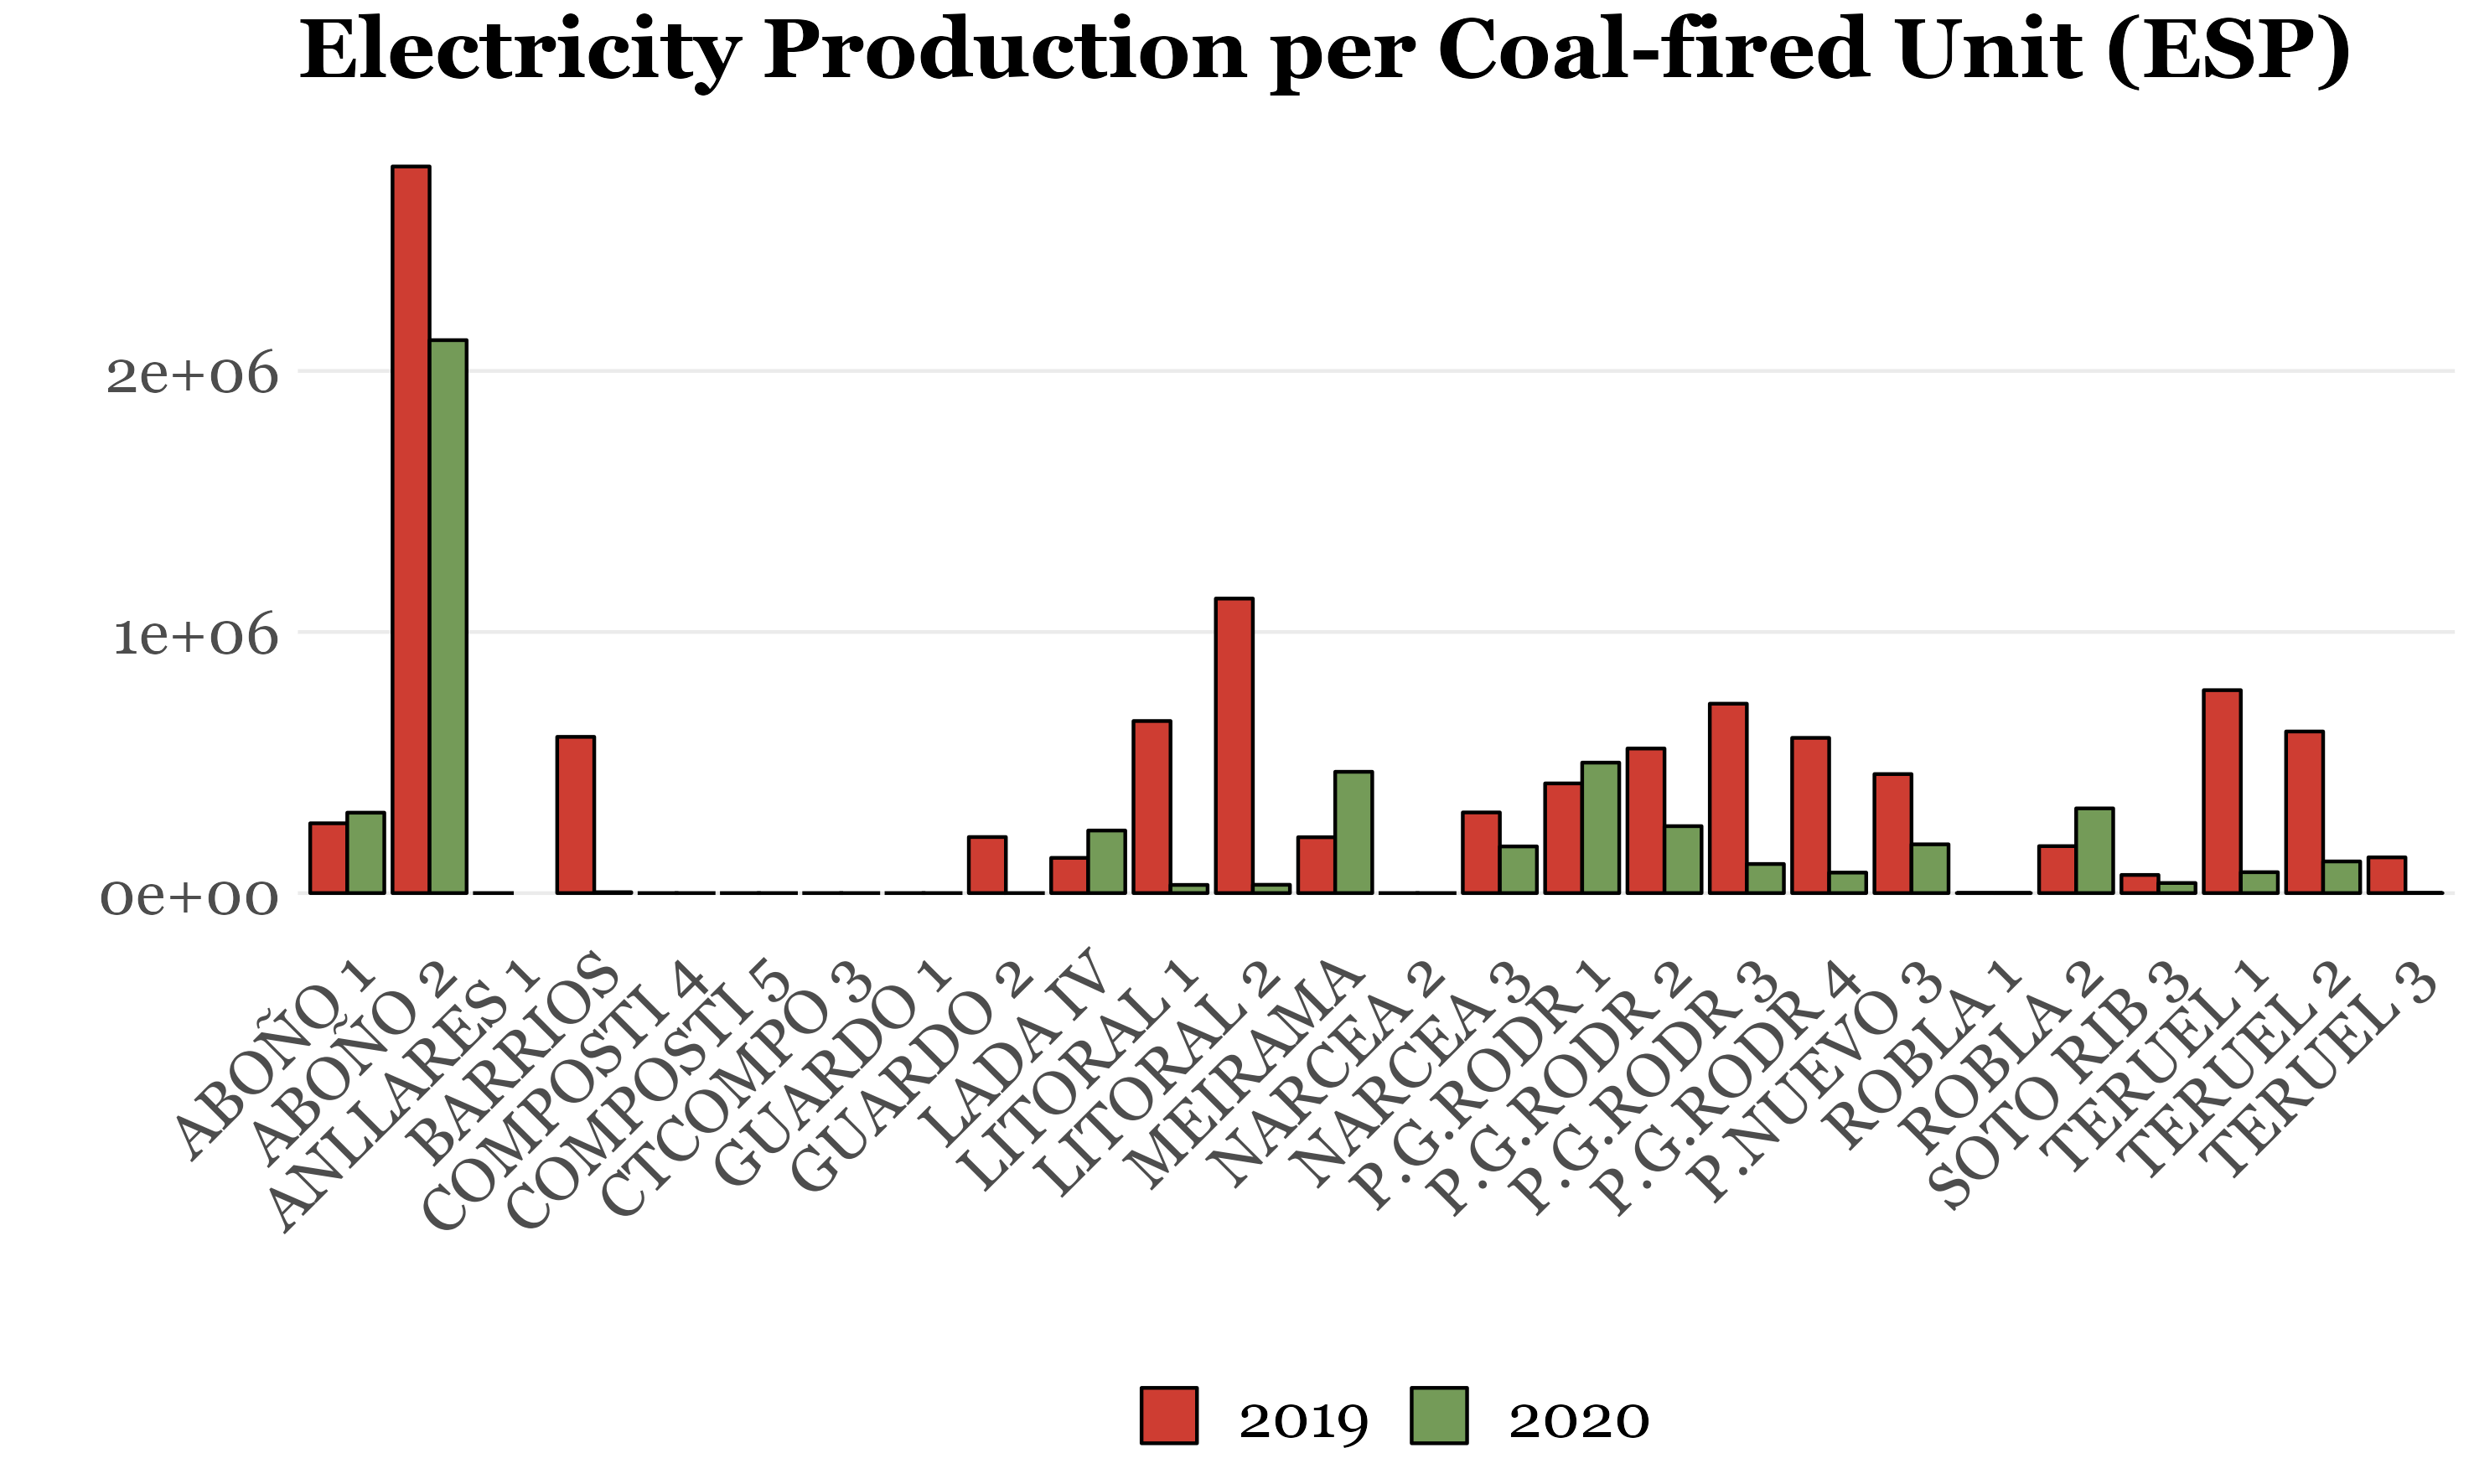


Figure S2: Annual electricity production reported per individual coal-fired power plant in Spain during 2019 and 2020 (ENTSO-E, 2022)

**References**

ENTSO-E: Transparency Platform, https://transparency.entsoe.eu/, last access: May 2023, 2022.
